# Supplementary material for: Equity considerations in clinical practice guidelines for traumatic brain injury and homelessness: a systematic review
Source: PubMed Central journal article supplement — eClinicalMedicine. 2023 Aug 24;63:102152. doi: 10.1016/j.eclinm.2023.102152 (PMC10474365; doi:10.1016/j.eclinm.2023.102152), 2023-08-24

## Appendix

|                                                                                   |    |
|-----------------------------------------------------------------------------------|----|
| Supplementary File 1. Search Strategy .....                                       | 2  |
| Peer-reviewed Search Strategy .....                                               | 2  |
| Grey Literature Search Strategy .....                                             | 10 |
| Keywords for Targeted Websites and Google Search Engine .....                     | 10 |
| Complete List of Websites Searched for Grey Literature .....                      | 10 |
| Supplementary File 2. Excluded Studies at Full-text Screening .....               | 14 |
| Supplementary File 3. Data Extraction and Synthesis .....                         | 46 |
| Table 1a. Data Extraction for Clinical Practice Guidelines for TBI .....          | 46 |
| Definitions .....                                                                 | 46 |
| Table 2a. Data Extraction for Clinical Practice Guidelines for Homelessness ..... | 57 |
| Definitions .....                                                                 | 57 |
| Supplementary File 4. Quality Appraisal .....                                     | 59 |
| Supplementary File 5. Chart Summarizing Quality Appraisal Findings .....          | 91 |

## Supplementary File 1. Search Strategy

### Peer-reviewed Search Strategy

Database: Ovid MEDLINE(R) ALL <1946 to November 15, 2021>

Platform: Ovid

Date searched: 2021-11-16

- 1 exp Homeless persons/
- 2 homeless\*.tw,kf.
- 3 Roofless\*.tw,kf.
- 4 (Marginal\* adj3 hous\*).tw,kf.
- 5 (precarious\* adj3 hous\*).tw,kf.
- 6 (unstabl\* adj3 hous\*).tw,kf.
- 7 (instab\* adj3 hous\*).tw,kf.
- 8 (interim\* adj3 hous\*).tw,kf.
- 9 (temporary adj3 (liv\* or hous\*)).tw,kf.
- 10 ((liv\* or sleep\* or stay or emergenc\*) adj3 shelter??).tw,kf.
- 11 houseless\*.tw,kf.
- 12 unsheltered.tw,kf.
- 13 rough sleeper?.tw,kf.
- 14 roughsleeping.tw,kf.
- 15 provisionallyaccommodat\*.tw,kf.
- 16 or/1-15
- 17 exp Brain Injuries/
- 18 exp Brain Injuries, Traumatic/
- 19 exp Brain Concussion/
- 20 Craniocerebral Trauma/
- 21 tbi\*2.tw,kf.
- 22 mtbi\*2.tw,kf.
- 23 concuss\*.tw,kf.
- 24 postconcuss\*.tw,kf.
- 25 ((head\* or brain\* or cerebr\* or crani\* or skull\* or intracran\*) adj2 (injur\* or trauma\* or damag\* or wound\* or swell\* or oedema\* or edema\* or fracture\* or contusion\* or pressur\*).tw,kf,jw.
- 26 ((brain\* or cerebr\* or intracerebr\* or crani\* or intracran\* or head\* or subdural\* or epidural\* or extradural\*) adj (haematoma\* or hematoma\* or hemorrhag\* or haemorrhag\* or bleed\*)).tw,kf.
- 27 or/17-26
- 28 guideline.pt. or exp guideline/ or exp practice guideline/ or exp Consensus/ or exp Consensus Development Conference, NIH/ or exp Consensus Development Conference/ or (consensuses or consensus or position statement or position statements or practice parameter or practice parameters or "appropriate use criteria" or appropriateness criteria or guidance statement or guidance statements or guideline or guidelines or bulletin).ti,bt.
- 29 (16 or 27) and 28
- 30 29 not (exp animals/ not exp humans/)

Database: Embase Classic+Embase <1947 to 2021 November 15>

Platform: Ovid

Date searched: 2021-11-16

- 1 exp Homeless person/
- 2 homeless\*.tw,kw.
- 3 Roofless\*.tw,kw.
- 4 (Marginal\* adj3 hous\*).tw,kw.
- 5 (precarious\* adj3 hous\*).tw,kw.
- 6 (unstabl\* adj3 hous\*).tw,kw.
- 7 (instab\* adj3 hous\*).tw,kw.
- 8 (interim\* adj3 hous\*).tw,kw.
- 9 (temporary adj3 (liv\* or hous\*)).tw,kw.

10 ((liv\* or sleep\* or stay or emergenc\*) adj3 shelter??).tw,kw.  
 11 houseless\*.tw,kw.  
 12 unsheltered.tw,kw.  
 13 roughsleeper?.tw,kw.  
 14 roughsleeping.tw,kw.  
 15 provisionallyaccommodat\*.tw,kw.  
 16 or/1-15  
 17 exp Brain Injury/  
 18 exp traumatic brain injury/  
 19 Brain concussion/ or postconcussion syndrome/  
 20 head injury/  
 21 tbi\*2.tw,kw.  
 22 mtbi\*2.tw,kw.  
 23 concuss\*.tw,kw.  
 24 postconcuss\*.tw,kw.  
 25 ((head\* or brain\* or cerebr\* or crani\* or skull\* or intracran\*) adj2 (injur\* or trauma\* or damag\* or wound\* or swell\* or oedema\* or edema\* or fracture\* or contusion\* or pressur\*).tw,kw,jx.  
 26 ((brain\* or cerebr\* or intracerebr\* or crani\* or intracran\* or head\* or subdural\* or epidural\* or extradural\*) adj (haematoma\* or hematoma\* or hemorrhag\* or haemorrhag\* or bleed\*).tw,kw.  
 27 or/17-26  
 28 \*practice guideline/  
 29 consensus/  
 30 consensus development/  
 31 (consensuses or consensus or position statement or position statements or practice parameter or practice parameters or "appropriate use criteria" or appropriateness criteria or guidance statement or guidance statements or guideline or guidelines or bulletin).ti,bt.  
 32 or/28-31  
 33 (16 or 27) and 32  
 34 33 not medline.cr.  
 35 limit 34 to conference abstracts  
 36 34 not 35  
 37 36 not (((rat or rats or mouse or mice or swine or porcine or murine or sheep or lambs or pigs or piglets or rabbit or rabbits or cat or cats or dog or dogs or cattle or bovine or monkey or monkeys or trout or marmoset\$1).ti. and animal experiment/) or (Animal experiment/ not (human experiment/ or human/)))

Database: APA PsycInfo <1806 to November Week 2 2021>

Platform: Ovid

Date searched: 2021-11-16

1 exp Homeless/ or shelters/  
 2 homeless\*.ti,ab.  
 3 Roofless\*.ti,ab.  
 4 (Marginal\* adj3 hous\*).ti,ab.  
 5 (precarious\* adj3 hous\*).ti,ab.  
 6 (unstabl\* adj3 hous\*).ti,ab.  
 7 (instab\* adj3 hous\*).ti,ab.  
 8 (interim\* adj3 hous\*).ti,ab.  
 9 (temporary adj3 (liv\* or hous\*)).ti,ab.  
 10 ((liv\* or sleep\* or stay or emergenc\*) adj3 shelter??).ti,ab.  
 11 houseless\*.ti,ab.  
 12 unsheltered.ti,ab.  
 13 rough sleeper?.ti,ab.  
 14 roughsleeping.ti,ab.  
 15 provisionallyaccommodat\*.ti,ab.  
 16 or/1-15

- 17 exp Brain Injuries/  
 18 exp traumatic brain injury/  
 19 Brain concussion/  
 20 head injuries/  
 21 tbi\*2.ti,ab.  
 22 mtbi\*2.ti,ab.  
 23 concuss\*.ti,ab.  
 24 postconcuss\*.ti,ab.  
 25 ((head\* or brain\* or cerebr\* or crani\* or skull\* or intracran\*) adj2 (injur\* or trauma\* or damag\* or wound\* or swell\* or oedema\* or edema\* or fracture\* or contusion\* or pressur\*)).ti,ab,jx. (51033)  
 26 ((brain\* or cerebr\* or intracerebr\* or crani\* or intracran\* or head\* or subdural\* or epidural\* or extradural\*) adj (haematoma\* or hematoma\* or hemorrhag\* or haemorrhag\* or bleed\*)).ti,ab.  
 27 or/17-26  
 28 treatment guidelines/  
 29 (consensus\* or consensus or position statement or position statements or practice parameter or practice parameters or "appropriate use criteria" or appropriateness criteria or guidance statement or guidance statements or guideline or guidelines or bulletin).ti,bt.  
 30 28 or 29  
 31 (16 or 27) and 30  
 32 limit 31 to animal  
 33 limit 32 to human  
 34 31 not (32 not 33)

Database: CINAHL Complete  
 Platform: EBSCOhost  
 Date searched: 2021-11-16

| #   | Query                                                                                                                    | Limiters/Expanders                                                     |
|-----|--------------------------------------------------------------------------------------------------------------------------|------------------------------------------------------------------------|
| S1  | (MH "Homelessness")                                                                                                      | Expanders - Apply equivalent subjects<br>Search modes - Boolean/Phrase |
| S2  | (MH "Homeless Persons")                                                                                                  | Expanders - Apply equivalent subjects<br>Search modes - Boolean/Phrase |
| S3  | TI homeless* OR AB homeless*                                                                                             | Expanders - Apply equivalent subjects<br>Search modes - Boolean/Phrase |
| S4  | TI Roofless* OR AB Roofless*                                                                                             | Expanders - Apply equivalent subjects<br>Search modes - Boolean/Phrase |
| S5  | TI (Marginal* n3 hous*) OR AB (Marginal* n3 hous*)                                                                       | Expanders - Apply equivalent subjects<br>Search modes - Boolean/Phrase |
| S6  | TI (precarious* n3 hous*) OR AB (precarious* n3 hous*)                                                                   | Expanders - Apply equivalent subjects<br>Search modes - Boolean/Phrase |
| S7  | TI (unstabl* n3 hous*) OR AB (unstabl* n3 hous*)                                                                         | Expanders - Apply equivalent subjects<br>Search modes - Boolean/Phrase |
| S8  | TI (instab* n3 hous*) OR AB (instab* n3 hous*)                                                                           | Expanders - Apply equivalent subjects<br>Search modes - Boolean/Phrase |
| S9  | TI (interim* n3 hous*) OR AB (interim* n3 hous*)                                                                         | Expanders - Apply equivalent subjects<br>Search modes - Boolean/Phrase |
| S10 | TI ((temporary n3 (liv* or hous*)) ) OR AB ( (temporary n3 (liv* or hous*)) )                                            | Expanders - Apply equivalent subjects<br>Search modes - Boolean/Phrase |
| S11 | TI ( ((liv* or sleep* or stay or emergenc*) n3 shelter*) ) OR AB ( ((liv* or sleep* or stay or emergenc*) n3 shelter*) ) | Expanders - Apply equivalent subjects<br>Search modes - Boolean/Phrase |
| S12 | TI houseless* OR AB houseless*                                                                                           | Expanders - Apply equivalent subjects<br>Search modes - Boolean/Phrase |
| S13 | TI unsheltered OR AB unsheltered                                                                                         | Expanders - Apply equivalent subjects                                  |

|     |                                                                                                                                                                                                                                                                                                                                                                                                                                                                                                                                                                                    |                                                                        |
|-----|------------------------------------------------------------------------------------------------------------------------------------------------------------------------------------------------------------------------------------------------------------------------------------------------------------------------------------------------------------------------------------------------------------------------------------------------------------------------------------------------------------------------------------------------------------------------------------|------------------------------------------------------------------------|
|     |                                                                                                                                                                                                                                                                                                                                                                                                                                                                                                                                                                                    | Search modes - Boolean/Phrase                                          |
| S14 | TI rough sleeper* OR AB rough sleeper*                                                                                                                                                                                                                                                                                                                                                                                                                                                                                                                                             | Expanders - Apply equivalent subjects<br>Search modes - Boolean/Phrase |
| S15 | TI rough sleeping OR AB rough sleeping                                                                                                                                                                                                                                                                                                                                                                                                                                                                                                                                             | Expanders - Apply equivalent subjects<br>Search modes - Boolean/Phrase |
| S16 | TI provisionally accommodat* OR AB provisionally accommodat*                                                                                                                                                                                                                                                                                                                                                                                                                                                                                                                       | Expanders - Apply equivalent subjects<br>Search modes - Boolean/Phrase |
| S17 | S1 OR S2 OR S3 OR S4 OR S5 OR S6 OR S7 OR S8 OR S9 OR S10 OR S11 OR S12 OR S13 OR S14 OR S15 OR S16                                                                                                                                                                                                                                                                                                                                                                                                                                                                                | Expanders - Apply equivalent subjects<br>Search modes - Boolean/Phrase |
| S18 | (MH "Brain Injuries+")                                                                                                                                                                                                                                                                                                                                                                                                                                                                                                                                                             | Expanders - Apply equivalent subjects<br>Search modes - Boolean/Phrase |
| S19 | (MH "Head Injuries")                                                                                                                                                                                                                                                                                                                                                                                                                                                                                                                                                               | Expanders - Apply equivalent subjects<br>Search modes - Boolean/Phrase |
| S20 | (MH "Brain Concussion+")                                                                                                                                                                                                                                                                                                                                                                                                                                                                                                                                                           | Expanders - Apply equivalent subjects<br>Search modes - Boolean/Phrase |
| S21 | TI ( TBI* OR mTBI* ) OR AB ( TBI* OR mTBI* )                                                                                                                                                                                                                                                                                                                                                                                                                                                                                                                                       | Expanders - Apply equivalent subjects<br>Search modes - Boolean/Phrase |
| S22 | TI ( concuss* or postconcuss* ) OR AB ( concuss* or postconcuss* )                                                                                                                                                                                                                                                                                                                                                                                                                                                                                                                 | Expanders - Apply equivalent subjects<br>Search modes - Boolean/Phrase |
| S23 | TI ( ((head* or brain* or cerebr* or crani* or skull* or intracran*) n2 (injur* or trauma* or damag* or wound* or swell* or oedema* or edema* or fracture* or contusion* or pressur*)) ) OR AB ( ((head* or brain* or cerebr* or crani* or skull* or intracran*) n2 (injur* or trauma* or damag* or wound* or swell* or oedema* or edema* or fracture* or contusion* or pressur*)) ) OR SO ( ((head* or brain* or cerebr* or crani* or skull* or intracran*) n2 (injur* or trauma* or damag* or wound* or swell* or oedema* or edema* or fracture* or contusion* or pressur*)) ) ) | Expanders - Apply equivalent subjects<br>Search modes - Boolean/Phrase |
| S24 | TI ( ((brain* or cerebr* or intracerebr* or crani* or intracran* or head* or subdural* or epidural* or extradural*) n1 (haematoma* or hematoma* or hemorrhag* or haemorrhag* or bleed*)) ) OR AB ( ((brain* or cerebr* or intracerebr* or crani* or intracran* or head* or subdural* or epidural* or extradural*) n1 (haematoma* or hematoma* or hemorrhag* or haemorrhag* or bleed*)) ) )                                                                                                                                                                                         | Expanders - Apply equivalent subjects<br>Search modes - Boolean/Phrase |
| S25 | S18 OR S19 OR S20 OR S21 OR S22 OR S23 OR S24                                                                                                                                                                                                                                                                                                                                                                                                                                                                                                                                      | Expanders - Apply equivalent subjects<br>Search modes - Boolean/Phrase |
| S26 | (MH "Practice Guidelines")                                                                                                                                                                                                                                                                                                                                                                                                                                                                                                                                                         | Expanders - Apply equivalent subjects<br>Search modes - Boolean/Phrase |
| S27 | (MH "Consensus")                                                                                                                                                                                                                                                                                                                                                                                                                                                                                                                                                                   | Expanders - Apply equivalent subjects<br>Search modes - Boolean/Phrase |
| S28 | TI (consensuses or consensus or position statement or position statements or practice parameter or practice parameters or "appropriate use criteria" or appropriateness criteria or guidance statement or guidance statements or guideline or guidelines or bulletin)                                                                                                                                                                                                                                                                                                              | Expanders - Apply equivalent subjects<br>Search modes - Boolean/Phrase |

|     |                                                                                               |                                                                        |
|-----|-----------------------------------------------------------------------------------------------|------------------------------------------------------------------------|
| S29 | S26 OR S27 OR S28                                                                             | Expanders - Apply equivalent subjects<br>Search modes - Boolean/Phrase |
| S30 | (s17 or s25) and s29                                                                          | Expanders - Apply equivalent subjects<br>Search modes - Boolean/Phrase |
| S31 | S30 NOT (((MH "Animals+") OR (MH "Animal Studies") OR (TI "animal model*")) NOT (MH "human")) | Expanders - Apply equivalent subjects<br>Search modes - Boolean/Phrase |

Database: Ovid MEDLINE(R) ALL <1946 to March 15, 2023>

Platform: Ovid

Date searched: 2023-03-16

- 1 exp PRISONS/
- 2 exp PRISONERS/
- 3 exp CRIMINALS/
- 4 Criminal Law/ or Jurisprudence/
- 5 Judicial Role/
- 6 (jurisprudenc\* or ligitat\*).tw,kf.
- 7 (legal adj (system? or servic\*).tw,kf.
- 8 (prisoner\* or prison? or imprison\*).tw,kf.
- 9 (inmate\* or convict\* or criminal\* or offender\*).tw,kf.
- 10 (correctional adj2 (setting? or service? or units or unit or facility or facilities or institution\* or centre\* or center\*).tw,kf.
- 11 (penal adj2 (setting? or service? or units or unit or facility or facilities or institution\* or centre\* or center\*).tw,kf.
- 12 (jail\* or penitentiary\* or gaol\*).tw,kf.
- 13 incarcerat\*.tw,kf.
- 14 (detain\* or detention?).tw,kf.
- 15 parole?.tw,kf.
- 16 probation\*.tw,kf.
- 17 felon\*.tw,kf.
- 18 Police/
- 19 (police or policing).tw,kf.
- 20 law enforce\*.tw,kf.
- 21 forensic\*.tw,kf.
- 22 forensic psychiatry/ or "commitment of mentally ill"/ or insanity defense/
- 23 (correctional or forensic).tw,kf.
- 24 judicial.tw,kf.
- 25 (court or courts).tw,kf.
- 26 (prosecution? or adjudication? or sentencing or sanctioning).tw,kf.
- 27 ((pre-trial or pretrial or preliminary) adj hearing?).tw,kf.
- 28 (crime or crimes).tw,kf.
- 29 (justice adj2 (system? or setting?)).tw,kf.
- 30 or/1-29
- 31 guideline.pt. or exp guideline/ or exp practice guideline/ or exp Consensus/ or exp Consensus Development Conference, NIH/ or exp Consensus Development Conference/ or (consensuses or consensus or position statement or position statements or practice parameter or practice parameters or "appropriate use criteria" or appropriateness criteria or guidance statement or guidance statements or guideline or guidelines or bulletin).ti,bt.
- 32 30 and 31
- 33 32 not (exp animals/ not exp humans/)
- 34 ("20220518" or "20220519" or 2022052\* or 2022053\* or 202206\* or 202207\* or 202208\* or 202209\* or 20221\* or 2023\*).dt,ez,da.
- 35 33 and 34

Database: Embase Classic+Embase <1947 to 2023 March 15>

Platform: Ovid

Date searched: 2023-03-16

- 1 exp PRISON/
- 2 PRISONER/

3 Offender/  
 4 Criminal Justice/ or Jurisprudence/  
 5 legal procedure/ or probation/  
 6 (jurisprudenc\* or ligitat\*).tw,kw.  
 7 (legal adj (system? or servic\*)).tw,kw.  
 8 (prisoner\* or prison? or imprison\*).tw,kw.  
 9 (inmate\* or convict\* or criminal\* or offender?).tw,kw.  
 10 (correctional adj2 (setting? or service? or units or unit or facility or facilities or institution\* or centre\* or center\*)).tw,kw.  
 11 (penal adj2 (setting? or service? or units or unit or facility or facilities or institution\* or centre\* or center\*)).tw,kw.  
 12 (jail\* or penitentiari\* or gaol\*).tw,kw.  
 13 incarcerat\*.tw,kw.  
 14 (detain\* or detention?).tw,kw.  
 15 parole?.tw,kw.  
 16 probation\*.tw,kw.  
 17 felon\*.tw,kw.  
 18 exp police/ or detention/  
 19 (police or policing).tw,kw.  
 20 law enforce\*.tw,kw.  
 21 forensic\*.tw,kw.  
 22 exp forensic medicine/  
 23 (correctional or forensic).jx.  
 24 judicial.tw,kf.  
 25 (court or courts).tw,kf.  
 26 (prosecution? or adjudication? or sentencing or sanctioning).tw,kf.  
 27 ((pre-trial or pretrial or preliminary) adj hearing?).tw,kf.  
 28 (crime or crimes).tw,kf.  
 29 (justice adj2 (system? or setting?)).tw,kf.  
 30 or/1-29  
 31 \*practice guideline/  
 32 consensus/  
 33 consensus development/  
 34 (consensuses or consensus or position statement or position statements or practice parameter or practice parameters or "appropriate use criteria" or appropriateness criteria or guidance statement or guidance statements or guideline or guidelines or bulletin).ti,bt.  
 35 or/31-34  
 36 30 and 35  
 37 36 not medline.cr.  
 38 limit 37 to conference abstracts  
 39 37 not 38  
 40 39 not (((rat or rats or mouse or mice or swine or porcine or murine or sheep or lambs or pigs or piglets or rabbit or rabbits or cat or cats or dog or dogs or cattle or bovine or monkey or monkeys or trout or marmoset\$1).ti. and animal experiment/) or (Animal experiment/ not (human experiment/ or human/)))  
 41 limit 40 to dc=20220518-20230316

Database: APA PsycInfo <1806 to March Week 1 2023>

Platform: Ovid

Date searched: 2023-03-16

1 exp Correctional Institutions/  
 2 exp Prisoners/  
 3 Criminal Offenders/  
 4 exp Criminal Justice/ or Criminal Law/  
 5 Legal Processes/ or probation/ or Parole/  
 6 (jurisprudenc\* or ligitat\*).ti,ab.  
 7 (legal adj (system? or servic\*)).ti,ab.  
 8 (prisoner\* or prison? or imprison\*).ti,ab.  
 9 (inmate\* or convict\* or criminal\* or offender?).ti,ab.  
 10 (correctional adj2 (setting? or service? or units or unit or facility or facilities or institution\* or centre\* or center\*)).tw,kw.

center\*)),ti,ab.  
11 (penal adj2 (setting? or service? or units or unit or facility or facilities or institution\* or centre\* or center\*)),ti,ab.  
12 (jail\* or penitentiary\* or gaol\*).ti,ab.  
13 incarcerat\*.ti,ab.  
14 (detain\* or detention?).ti,ab.  
15 parole?.ti,ab.  
16 probation\*.ti,ab.  
17 felon\*.ti,ab.  
18 Police Personnel/ or exp Law Enforcement/  
19 (police or policing).ti,ab.  
20 law enforce\*.ti,ab.  
21 forensic\*.ti,ab.  
22 Forensic Psychiatry/ or Forensic Psychology/  
23 (correctional or forensic).jx.  
24 judicial.ti,ab.  
25 (court or courts).ti,ab.  
26 (prosecution? or adjudication? or sentencing or sanctioning).ti,ab.  
27 ((pre-trial or pretrial or preliminary) adj hearing?).ti,ab.  
28 (crime or crimes).ti,ab.  
29 (justice adj2 (system? or setting?)).ti,ab.  
30 or/1-29  
31 treatment guidelines/  
32 (consensuses or consensus or position statement or position statements or practice parameter or practice parameters or "appropriate use criteria" or appropriateness criteria or guidance statement or guidance statements or guideline or guidelines or bulletin).ti,bt.  
33 31 or 32  
34 30 and 33  
35 limit 34 to animal  
36 limit 34 to human  
37 34 not (35 not 36)  
38 limit 37 to up=20220519-20230316

\*\*\*\*\*

Database: CINAHL Complete  
Platform: EBSCOhost  
Date searched: 2023-03-16

| #  | Query                                                                                                                                                                                                     | Limiters/Expanders                                                     |
|----|-----------------------------------------------------------------------------------------------------------------------------------------------------------------------------------------------------------|------------------------------------------------------------------------|
| S1 | (MH "Correctional Facilities")                                                                                                                                                                            | Expanders - Apply equivalent subjects<br>Search modes - Boolean/Phrase |
| S2 | (MH "Prisoners")                                                                                                                                                                                          | Expanders - Apply equivalent subjects<br>Search modes - Boolean/Phrase |
| S3 | (MH "Public Offenders+")                                                                                                                                                                                  | Expanders - Apply equivalent subjects<br>Search modes - Boolean/Phrase |
| S4 | (MH "Jurisprudence") OR (MH "Criminal Justice")                                                                                                                                                           | Expanders - Apply equivalent subjects<br>Search modes - Boolean/Phrase |
| S5 | TI ( (jurisprudenc* or ligitat* ) ) OR AB ( (jurisprudenc* or ligitat* ) )                                                                                                                                | Expanders - Apply equivalent subjects<br>Search modes - Boolean/Phrase |
| S6 | TI ( (legal n1 (system* or servic*)) ) OR AB ( (legal n1 (system* or servic*)) ) OR TI (((pre-trial or pretrial or preliminary) n1 hearing?) OR AB (((pre-trial or pretrial or preliminary) n1 hearing?)) | Expanders - Apply equivalent subjects<br>Search modes - Boolean/Phrase |
| S7 | TI ( (prison* or imprison* or judicial or court or courts ) ) OR AB ( (prison* or imprison* or judicial or court or courts ) )                                                                            | Expanders - Apply equivalent subjects<br>Search modes - Boolean/Phrase |
| S8 | TI ( (inmate* or convict* or criminal* or offender* or crime or crimes ) ) OR AB ( (inmate* or convict* or criminal* or offender* or crime or crimes ) )                                                  | Expanders - Apply equivalent subjects<br>Search modes - Boolean/Phrase |



|     |                                                                                                                                                                                                                                                                                                                  |                                                                        |
|-----|------------------------------------------------------------------------------------------------------------------------------------------------------------------------------------------------------------------------------------------------------------------------------------------------------------------|------------------------------------------------------------------------|
| S9  | TI ( (correctional n2 (setting or settings or service or services or units or unit or facility or facilities or institution* or centre* or center*)) ) OR AB ( (correctional n2 (setting or settings or service or services or units or unit or facility or facilities or institution* or centre* or center*)) ) | Expanders - Apply equivalent subjects<br>Search modes - Boolean/Phrase |
| S10 | TI ( (penal n2 (setting or settings or service or services or units or unit or facility or facilities or institution* or centre* or center*)) ) OR AB ( (penal n2 (setting or settings or service or services or units or unit or facility or facilities or institution* or centre* or center*)) )               | Expanders - Apply equivalent subjects<br>Search modes - Boolean/Phrase |
| S11 | TI ( (jail* or penitentiary* or gaol*) ) OR AB ( (jail* or penitentiary* or gaol*) ) OR TI (justice n2 (system# or setting#)) OR AB (justice n2 (system# or setting#))                                                                                                                                           | Expanders - Apply equivalent subjects<br>Search modes - Boolean/Phrase |
| S12 | TI incarcerat* OR AB incarcerat*                                                                                                                                                                                                                                                                                 | Expanders - Apply equivalent subjects<br>Search modes - Boolean/Phrase |
| S13 | TI ( detain* or detention* or prosecution# or adjudication# or sentencing or sanctioning ) OR AB ( detain* or detention* or prosecution# or adjudication# or sentencing or sanctioning )                                                                                                                         | Expanders - Apply equivalent subjects<br>Search modes - Boolean/Phrase |
| S14 | TI parole* OR AB parole*                                                                                                                                                                                                                                                                                         | Expanders - Apply equivalent subjects<br>Search modes - Boolean/Phrase |
| S15 | TI probation* OR AB probation*                                                                                                                                                                                                                                                                                   | Expanders - Apply equivalent subjects<br>Search modes - Boolean/Phrase |
| S16 | TI felon* OR AB felon*                                                                                                                                                                                                                                                                                           | Expanders - Apply equivalent subjects<br>Search modes - Boolean/Phrase |
| S17 | TI ( police or policing ) OR AB ( police or policing )                                                                                                                                                                                                                                                           | Expanders - Apply equivalent subjects<br>Search modes - Boolean/Phrase |
| S18 | TI law enforce* OR AB law enforce*                                                                                                                                                                                                                                                                               | Expanders - Apply equivalent subjects<br>Search modes - Boolean/Phrase |
| S19 | TI forensic* OR AB forensic*                                                                                                                                                                                                                                                                                     | Expanders - Apply equivalent subjects<br>Search modes - Boolean/Phrase |
| S20 | (MH "Police")                                                                                                                                                                                                                                                                                                    | Expanders - Apply equivalent subjects<br>Search modes - Boolean/Phrase |
| S21 | (MH "Forensic Psychiatry+")                                                                                                                                                                                                                                                                                      | Expanders - Apply equivalent subjects<br>Search modes - Boolean/Phrase |
| S22 | SO correctional or forensic                                                                                                                                                                                                                                                                                      | Expanders - Apply equivalent subjects<br>Search modes - Boolean/Phrase |
| S23 | TI judicial OR AB judicial                                                                                                                                                                                                                                                                                       | Expanders - Apply equivalent subjects<br>Search modes - Boolean/Phrase |
| S24 | ( TI court or courts ) OR ( AB court or courts )                                                                                                                                                                                                                                                                 | Expanders - Apply equivalent subjects<br>Search modes - Boolean/Phrase |
| S25 | TI ( prosecution# or adjudication# or sentencing or sanctioning ) OR AB ( prosecution# or adjudication# or sentencing or sanctioning )                                                                                                                                                                           | Expanders - Apply equivalent subjects<br>Search modes - Boolean/Phrase |
| S26 | TI ( ((pre-trial or pretrial or preliminary) n1 hearing#) ) OR AB ( ((pre-trial or pretrial or preliminary) n1 hearing#) )                                                                                                                                                                                       | Expanders - Apply equivalent subjects<br>Search modes - Boolean/Phrase |
| S27 | TI ( crime or crimes ) OR AB ( crime or crimes )                                                                                                                                                                                                                                                                 | Expanders - Apply equivalent subjects<br>Search modes - Boolean/Phrase |
| S28 | TI ( (justice n2 (system# or setting#)) ) OR AB ( (justice n2 (system# or setting#)) )                                                                                                                                                                                                                           | Expanders - Apply equivalent subjects<br>Search modes - Boolean/Phrase |
| S29 | S1 OR S2 OR S3 OR S4 OR S5 OR S6 OR S7 OR S8 OR S9 OR S10 OR S11 OR S12 OR S13 OR S14 OR S15 OR S16 OR S17 OR S18 OR S19 OR S20 OR S21 OR S22 OR S23 OR S24 OR S25 OR S26 OR S27 OR S28                                                                                                                          | Expanders - Apply equivalent subjects<br>Search modes - Boolean/Phrase |

|     |                                                                                                                                                                                                                                                                       |                                                                        |
|-----|-----------------------------------------------------------------------------------------------------------------------------------------------------------------------------------------------------------------------------------------------------------------------|------------------------------------------------------------------------|
| S30 | TI (consensuses or consensus or position statement or position statements or practice parameter or practice parameters or "appropriate use criteria" or appropriateness criteria or guidance statement or guidance statements or guideline or guidelines or bulletin) | Expanders - Apply equivalent subjects<br>Search modes - Boolean/Phrase |
| S31 | (MH "Consensus")                                                                                                                                                                                                                                                      | Expanders - Apply equivalent subjects<br>Search modes - Boolean/Phrase |
| S32 | (MH "Practice Guidelines")                                                                                                                                                                                                                                            | Expanders - Apply equivalent subjects<br>Search modes - Boolean/Phrase |
| S33 | S30 OR S31 OR S32                                                                                                                                                                                                                                                     | Expanders - Apply equivalent subjects<br>Search modes - Boolean/Phrase |
| S34 | S29 AND S33                                                                                                                                                                                                                                                           | Expanders - Apply equivalent subjects<br>Search modes - Boolean/Phrase |
| S35 | EM 20220519- OR ZD "in process"                                                                                                                                                                                                                                       | Expanders - Apply equivalent subjects<br>Search modes - Boolean/Phrase |
| S36 | S34 AND S35                                                                                                                                                                                                                                                           | Expanders - Apply equivalent subjects<br>Search modes - Boolean/Phrase |

### Grey Literature Search Strategy

On April 23-24, 2022 and March 15-29, 2023, we searched the following sources to identify clinical practice guidelines (CPGs) outside of the peer-reviewed literature:

1. Websites included in *Grey Matters: A Practical Tool for Searching Health-Related Literature*
2. Targeted websites identified by the research team, including guideline development organizations, CPG databases/repositories, health technology assessment agencies, medical or allied health professional associations, and brain injury and housing organizations
3. First ten pages of Google Search

The following keywords were used to search the websites using the **final structure (A+B) OR (A+C)**. Where available, the search bar was used to search for grey literature; websites without a search bar were manually reviewed.

### Keywords for Targeted Websites and Google Search Engine

| Concept                         | Keyword                                                                                                                                                                                                                                                          |
|---------------------------------|------------------------------------------------------------------------------------------------------------------------------------------------------------------------------------------------------------------------------------------------------------------|
| A. Clinical Practice Guidelines | consensuses or consensus or position statement or position statements or practice parameter or practice parameters or "appropriate use criteria" or appropriateness criteria or guidance statement or guidance statements or guideline or guidelines or bulletin |
| B. Traumatic brain Injury       | brain injury or concussion or brain trauma or head injury or head trauma or TBI                                                                                                                                                                                  |
| C. Homelessness                 | homelessness or roofless or marginally housed or precariously housed or unstably housed or provisionally accommodated or houseless or shelters                                                                                                                   |

### Complete List of Websites Searched for Grey Literature

- Alberta College of Family Physicians Tools for Practice
- Health Quality Council of Alberta
- Health Quality Ontario
- SickKids, Reports and Theses
- Institut National d'excellence en sante et en services sociaux (INESSS)
- McGill University Health Centre (MUHC), Technology Assessment Unit Reports
- Newfoundland & Labrador Centre for Applied Health Research
- Therapeutics Initiative. Therapeutics Letter
- University of British Columbia. Centre for Health Services and Policy Research

- International Network of Agencies for Health Technology Assessment (INAHTA)
- World Health Organization Regional Office for Europe
- Medical Services Advisory Committee
- The Joanna Briggs Institute EBP Database
- Monash Health, Centre for Clinical Effectiveness (CCE), Publications

- Austrian Institute for Health Technology Assessment (AIHTA), Publications
- KCE Belgian Health Care Knowledge Centre
- Danish Health and Medicines Authority (DHMA)
- Comité d'Évaluation de diffusion des Innovations Technologiques (CEDIT), Recommendations and Reports
- Haute Autorité de santé/ french National Authority for Health (HAS)
- Health Service Executive. Irish Health Repository
- National Health Care Institute, Netherlands
- Norwegian Institute of Public Health
- Swedish Agency for Health Technology Assessment (SBU) and Assessment of Social Services
- Healthcare Improvement Scotland
- National Institute for Health and Care Excellence (NICE)
- Agency for Healthcare Research and Quality
- British Columbia Ministry of Health BC Guidelines
- Canadian Medical Association, Clinical Practice Guidelines
- The College of Physicians and Surgeons of Ontario (CPSO)
- Public Health Agency of Canada (PHAC). Disease Prevention and Control Guidelines
- Registered Nurses' Association of Ontario (RNAO) Nursing Best Practice Guidelines
- Winnipeg Regional Health Authority (WRHA). Evidence Informed Practice Tools
- Academy of Medicine of Malaysia
- Haute Autorité de santé (HAS)
- Institute for Clinical Systems Improvement (ICSI)
- National Health and Medical Research Council (NHMRC) Australia's Clinical Practice Guidelines Portal
- Scottish Intercollegiate Guidelines Network (SIGN)
- Physiotherapy Evidence Database
- National Rehabilitation Information Centre
- Bandolier Knowledge
- Latin-American and Caribbean Center on Health Sciences Information (LILACS)
- McMaster University, McMaster Health Forum, Health Systems Evidence
- TRIP Database - Clinical Search Engine
- National Collaborating Centre for Chronic Conditions, Guideline Central
- RACGP (MD Anderson Cancer Centre )
- American Academy of Physical Medicine and Rehabilitation
- Canadian Alliance to End Homelessness
- Canadian Housing First Toolkit
- Centre for Urban Health Solutions
- Cochrane Methods Equity Homeless Health Guidelines
- Evidence Exchange Network for Mental Health and Addictions
- Mental Health Commission of Canada
- Model Systems Knowledge Translation Center
- National Association of State Head Injury Administrators
- National Health Care for the Homeless Council
- National Institute on Disability, Independent Living and Rehabilitation Research (NIDILRR)
- Ruff Institute of Global Homelessness
- The Center for Brain Injury Research and Training
- The Homeless Hub

- Toronto Alliance to End Homelessness
- Toronto Mental Health and Addictions
- Wellesley Institute
- Epistemonikos

## Supplementary File 2. Excluded Studies at Full-text Screening

| Title                                                                                                                                                                                                                                                           | Authors                                                                                                                                                                                                  | Year | Reason for exclusion      |
|-----------------------------------------------------------------------------------------------------------------------------------------------------------------------------------------------------------------------------------------------------------------|----------------------------------------------------------------------------------------------------------------------------------------------------------------------------------------------------------|------|---------------------------|
| "New" Italian guidelines for Adult Traumatic Brain Injury: A tool with potential and limitations                                                                                                                                                                | Stocchetti, N.; Conte, V.; Canavesi, K.                                                                                                                                                                  | 2008 | Not a CPG                 |
| [A Scandinavian guideline for initial management of minimal, mild and moderate head trauma in children]                                                                                                                                                         | Rosenlund, C.; Hoi-Hansen, C. E.; Lundstrom, K. E.; Born, A. P.; Pedersen, O.; Astrand, R.                                                                                                               | 2017 | Recommendations not rated |
| [Addendum to the Dutch guideline for minor head/brain injury]                                                                                                                                                                                                   | van den Brand, C. L.; van der Naalt, J.; Hageman, G.; Bienfait, H. P.; van der Kruijk, R. A.; Jellema, K.                                                                                                | 2017 | CPG Summary               |
| [Brain concussion and sports--new guidelines for management]                                                                                                                                                                                                    | Tegner, Y.; Gustafsson, B.; Forssblad, M.; Lundgren, L.; Solveborn, S. A.                                                                                                                                | 2007 | Recommendations not rated |
| [Current guidelines for the diagnosis and treatment of severe brain injury]                                                                                                                                                                                     | Potapov, A. A.; Krylov, V. V.; Likhterman, L. B.; Tsarenko, S. V.; Gavrilov, A. G.; Petrikov, S. S.                                                                                                      | 2006 | No Full-Text              |
| [Evidence-based guidelines for emergency treatment of severe cranial injuries]                                                                                                                                                                                  | Astrup, J.                                                                                                                                                                                               | 1997 | No Full-Text              |
| [Guidelines for brain concussion in sports--how are they to be applied in boxing?]                                                                                                                                                                              | Zetterberg, H.; Hietala, M. A.; Wallin, A.; Blennow, K.                                                                                                                                                  | 2007 | Not a CPG                 |
| [Guide-lines for head injured patients management in adult age. Neurosurgical Society of France]                                                                                                                                                                | Lapierre, F.                                                                                                                                                                                             | 1998 | No Full-Text              |
| [Guidelines for primary management of patients with craniocerebral trauma. Intensive Care Medicine and Neurotraumatology Working Group of the German Society of Neurosurgery. Scientific Neuroanesthesia Circle of the German Society of Anesthesiology and Int | Anonymous                                                                                                                                                                                                | 1997 | Adaptation of CPG         |
| [Guidelines for the diagnosis and treatment of severe traumatic brain injury. Part 2. Intensive care and neuromonitoring]                                                                                                                                       | Potapov, A. A.; Krylov, V. V.; Gavrilov, A. G.; Kravchuk, A. D.; Likhterman, L. B.; Petrikov, S. S.; Talypov, A. E.; Zakharova, N. E.; Oshorov, A. V.; Sychev, A. A.; Alexandrova, E. V.; Solodov, A. A. | 2016 | Recommendations not rated |
| [Guidelines for the Exploration of the Conscious State in Patients with Craniocerebral Injuries]                                                                                                                                                                | Baliusjuli, R.; Vendrelltorne, E.; Daurella, J.; Ojedagil, J.                                                                                                                                            | 1965 | No Full-Text              |
| [Guidelines for the initial management of adult patients with minimal to moderate head injury]                                                                                                                                                                  | Eskesen, V.; Springborg, J. B.; Unden, J.; Romner, B.                                                                                                                                                    | 2014 | CPG Summary               |
| [Guidelines for the management of acute craniocerebral trauma (ACCT)]                                                                                                                                                                                           | Van der Hofstadt, P.                                                                                                                                                                                     | 1977 | No Full-Text              |
| [Guidelines for the management of severe head injury. Part 1. Neurotrauma system and neuroimaging]                                                                                                                                                              | Potapov, A. A.; Krylov, V. V.; Gavrilov, A. G.; Kravchuk, A. D.; Likhterman, L. B.; Petrikov, S. S.; Talypov, A. E.; Zakharova, N. E.; Oshorov, A. V.; Solodov, A. A.                                    | 2015 | non-english               |
| [Guidelines for the management of severetraumatic brain injury. Part 3. Surgical management of severe traumatic brain injury (Options)]                                                                                                                         | Potapov, A. A.; Krylov, V. V.; Gavrilov, A. G.; Kravchuk, A. D.; Likhterman, L. B.; Petrikov, S. S.; Talypov, A. E.; Zakharova, N. E.; Solodov, A. A.                                                    | 2016 | non-english               |

| <b>Title</b>                                                                                                                                                                                                                                                    | <b>Authors</b>                                                                                                                                                | <b>Year</b> | <b>Reason for exclusion</b> |
|-----------------------------------------------------------------------------------------------------------------------------------------------------------------------------------------------------------------------------------------------------------------|---------------------------------------------------------------------------------------------------------------------------------------------------------------|-------------|-----------------------------|
| [Guidelines for the Management of Traumatic Brain Injury:Updated in 2019]                                                                                                                                                                                       | Karibe, H.; Tominaga, T.                                                                                                                                      | 2020        | Paywall                     |
| [Guidelines on the management of epidural hematoma in infancy and childhood]                                                                                                                                                                                    | Pasztor, A.; Paraicz, E.; Dobronyi, I.                                                                                                                        | 1983        | Paywall                     |
| [Japanese Guideline for Traumatic Intracranial Hypotension:Interpretation and Current Situation]                                                                                                                                                                | Dohi, K.; Kato, A.; Yagi, M.                                                                                                                                  | 2021        | Paywall                     |
| [National guidelines for treatment of chronic subdural haematoma]                                                                                                                                                                                               | Ronn Jensen, T. S.; Andersen-Ranberg, N.; Poulsen, F. R.; Bergholt, B.; Hundsholt, T.; Fugleholm, K.                                                          | 2018        | Not a CPG                   |
| [New guidelines for head injuries]                                                                                                                                                                                                                              | Sundstrom, T.; Wester, K.; Enger, M.; Melhuus, K.; Ingebrigtsen, T.; Romner, B.; Unden, J.                                                                    | 2013        | CPG Summary                 |
| [Practical management guidelines in closed craniocerebral trauma]                                                                                                                                                                                               | Atanasov, V.; Gabrovski, S.                                                                                                                                   | 1997        | No Full-Text                |
| [Pre-hospital conduct for patients with a severe craniocerebral trauma according to new guidelines]                                                                                                                                                             | Demyda, I.; Maciejewski, R.                                                                                                                                   | 2009        | No Full-Text                |
| [Prehospital management of patients with severe head injuries. Scandinavian guidelines according to Brain Trauma Foundation]                                                                                                                                    | Bellander, B. M.; Sollid, S.; Kock-Jensen, C.; Juul, N.; Eskesen, V.; Sundstrom, T.; Wester, K.; Romner, B.                                                   | 2008        | Adaptation of CPG           |
| [Recommendation on temperature management after cardiopulmonary arrest and severe traumatic brain injury in childhood beyond the neonatal period : Statement of the German Society for Neonatology and Pediatric Intensive Care Medicine (GNPI) and the scienti | Brenner, S.; Eich, C.; Rellensmann, G.; Schuhmann, M. U.; Nicolai, T.; Hoffmann, F.                                                                           | 2017        | Recommendations not rated   |
| [Recommendations for early care of patients with skull and brain trauma in multiple injuries (prepared by the German Interdisciplinary Union for Intensive and Trauma Care (DIVI) on November 5, 1999]                                                          | Piek, J.; Jantzen, J. P.                                                                                                                                      | 2000        | No Full-Text                |
| [Recommendations for the medical treatment of severe cranioccephalic trauma. Working group of Intensive Neurology of the Catalan Association of Intensive Health Care (Neuro-ACMI)]                                                                             | Anonymous                                                                                                                                                     | 2000        | Paywall                     |
| [Recommendations for the treatment of serious adult head injury. I. Initial evaluation, prehospital observation and treatment, hospitalization criteria, systemic and cerebral monitoring. Societza Italiana di Anestesia, Analgesia, Rianimazione e Terpia Int | Procaccio, F.; Stocchetti, N.; Citerio, G.; Berardino, M.; Beretta, L.; Della Corte, F.; D'Avella, D.; Brambilla, G. L.; Delfini, R.; Servadei, F.; Tomei, G. | 1999        | Recommendations not rated   |

| Title                                                                                                                                                                        | Authors                                                                                                                                                                       | Year | Reason for exclusion          |
|------------------------------------------------------------------------------------------------------------------------------------------------------------------------------|-------------------------------------------------------------------------------------------------------------------------------------------------------------------------------|------|-------------------------------|
| [Recommendations for the treatment of serious adult head injury. II. Medical treatment criteria. Societza Italiana di Anestesia, Analgesia, Rianimazione e Terpia Intensiva] | Beretta, L.; Citerio, G.; Stocchetti, N.; Procaccio, F.; D'Avella, D.; Brambilla, G. L.; Delfini, R.; Servadei, F.; Tomei, G.                                                 | 1999 | Recommendations not rated     |
| [Recommendations on the evaluation and initial treatment of craniocerebral injuries. The Working Group of Craniocerebral Injuries in Catalonia]                              | Anonymous                                                                                                                                                                     | 1999 | No Full-Text                  |
| [Revised practice guideline 'Management of patients with mild traumatic head/brain injury']                                                                                  | de Kruijk, J. R.; Nederkoorn, P. J.; Reijners, E. P.; Hageman, G.; Werkgroep 'Richtlijn voor de opvang en diagnostiek van patienten met licht traumatisch, hoofd-hersenletsel | 2012 | Not a CPG                     |
| [Scandinavian guidelines for head injuries in children]                                                                                                                      | Sundstrom, T.; Wester, K.                                                                                                                                                     | 2016 | CPG Summary                   |
| [Scandinavian guidelines for management of head injuries. Evidence-based management of minimal, mild and moderate head injuries]                                             | Romner, B.; Ingebrigtsen, T.; Kock-Jensen, C.                                                                                                                                 | 2000 | No Full-Text                  |
| [Scandinavian guidelines for management of minimal, mild and moderate head injuries]                                                                                         | Ingebrigtsen, T.; Rise, I. R.; Wester, K.; Romner, B.; Kock-Jensen, C.                                                                                                        | 2000 | Older version of CPG          |
| [Scandinavian guidelines for prehospital management of severe traumatic brain injury]                                                                                        | Sollid, S.; Sundstrom, T.; Kock-Jensen, C.; Juul, N.; Eskesen, V.; Bellander, B. M.; Wester, K.; Romner, B.                                                                   | 2008 | Adaptation of CPG             |
| [Scandinavian guidelines on the pre-hospital management of traumatic brain injury]                                                                                           | Juul, N.; Sollid, S.; Sundstrom, T.; Kock-Jensen, C.; Eskesen, V.; Bellander, B. M.; Wester, K.; Romner, B.; RomnerScandinavian Neurotrauma, Committee                        | 2008 | Adaptation of CPG             |
| [Sports and head injuries. Guidelines for the management and subsequent return to training and competition]                                                                  | Lexell, J.; Romner, B.; Tegner, Y.                                                                                                                                            | 2000 | Adaptation of CPG             |
| [The management of severe cranial injuries in the early phase. Agence Nationale d'Accreditation et d'Evaluation en Sante (ANAES)]                                            | Boulard, G.; Cantagrel, S.                                                                                                                                                    | 1999 | No Full-Text                  |
| [The NHG practice guideline 'Head injury']                                                                                                                                   | Draijer, L. W.; Kurver, M. J.; Opstelten, W.                                                                                                                                  | 2015 | CPG Summary                   |
| [Thromboprophylaxis in neurosurgery and head trauma]                                                                                                                         | Payen, J. F.; Faillot, T.; Audibert, G.; Vergnes, M. C.; Bosson, J. L.; Lestienne, B.; Bernard, C.; Bruder, N.                                                                | 2005 | Not a TBI or Homelessness CPG |
| [Updated management of adults with head injuries. Scandinavian Neurotrauma Committee's new guidelines provide guidance at minimal, mild and moderate injuries]               | Uden, J.; Bellander, B. M.; Romner, B.                                                                                                                                        | 2013 | CPG Summary                   |
| [US guidelines for treatment of increased intracranial pressure. American Association of Neurological Surgeons, Congress of Neurological Surgeons, Brain Trauma Foundation]  | Unterberg, A.                                                                                                                                                                 | 1997 | No Full-Text                  |



| Title                                                                                                                                                           | Authors                                                                                                                                                                                                                                                                                                                                                                                           | Year | Reason for exclusion          |
|-----------------------------------------------------------------------------------------------------------------------------------------------------------------|---------------------------------------------------------------------------------------------------------------------------------------------------------------------------------------------------------------------------------------------------------------------------------------------------------------------------------------------------------------------------------------------------|------|-------------------------------|
| [Venous thromboembolic prophylaxis. Guidelines for adults in Argentina]                                                                                         | Vazquez, F. J.; Lifschitz, E.; Watman, R.; Vilaseca, A. B.; Rodriguez, V. E.; Cruciani, A. J.; Korin, J. D.; Tabares, A. H.; Ceresetto, J. M.; Clavier Lietti, M. M.; Stinga, C. A.; Bongiorno, P.; Princz, M. A.; Schutz, N.; Barada Palmero, C. E.; Salvador, R.; Canaveri, A.; Moron, J.; Pale, C.; Saimovici, J.; Capparelli, F. J.; Wainsztein, N. A.; Baldessari, E. M.; Ariscancela, M. E. | 2013 | Not a TBI or Homelessness CPG |
| [What is new in the new guideline on legal evaluation after closed head injury?]                                                                                | Anonymous                                                                                                                                                                                                                                                                                                                                                                                         | 2018 | Duplicate                     |
| A consensus on optimization of care in patients with growth hormone deficiency and mild traumatic brain injury                                                  | Yuen, K. C. J.; Masel, B.; Jaffee, M. S.; O'Shanick, G.; Wexler, T. L.; Reifschneider, K.; Urban, R. J.; Hoang, S.; Kelepouris, N.; Hoffman, A. R.                                                                                                                                                                                                                                                | 2022 | Recommendation not rated      |
| A critical review to traumatic brain injury clinical practice guidelines                                                                                        | Di, B. S.; Wei, M.; Ma, W. J.; Zhang, Q.; Lu, A. Q.; Wang, H.; Niu, Y.; Cao, N.; Guo, T. K.                                                                                                                                                                                                                                                                                                       | 2019 | CPG Summary                   |
| Acute Management of Mild Traumatic Brain Injury in Military Operational Settings                                                                                | The Defense and Veterans Brain Injury Center Working Group                                                                                                                                                                                                                                                                                                                                        | 2008 | Recommendations not rated     |
| A guide to selecting and monitoring brain injury rehabilitation services.                                                                                       | Brain injury association and the defence and Veterans head injury program                                                                                                                                                                                                                                                                                                                         | 2015 | Recommendations not rated     |
| A guideline and technical certification program for neuroendoscopic surgery. [Japanese]                                                                         | Ohira, T.; Kato, Y.; Kamikawa, S.; Kitano, M.; Kitamura, T.; Nagatani, T.; Natori, Y.; Miki, T.; Mori, H.                                                                                                                                                                                                                                                                                         | 2007 | No English Translation        |
| A Guideline for Safety in Neonatal Head Surveillance                                                                                                            | Hoffman, Sandra                                                                                                                                                                                                                                                                                                                                                                                   | 2018 | Not a CPG                     |
| A Positive Approach to Head Injury: Guidelines for Professionals and Families                                                                                   | Boissoneau, Cheryl                                                                                                                                                                                                                                                                                                                                                                                | 1988 | Not a CPG                     |
| A review of family intervention guidelines for pediatric acquired brain injuries                                                                                | Cole, W. R.; Paulos, S. K.; Cole, C. A. S.; Tankard, C.                                                                                                                                                                                                                                                                                                                                           | 2009 | Not a TBI or Homelessness CPG |
| A review of research efforts to address the 2008 ACEP guideline for mild traumatic brain injury                                                                 | Manquen, J.; Combs, T.; Mazur-Mosiewicz, A.; Sanders, D.; Schiesel, M.; Gordon, J.; Farabough, M.; Vassar, M.                                                                                                                                                                                                                                                                                     | 2019 | Recommendations not rated     |
| A Scoping Review of Concussion Guidelines in Amateur Sports in the United Kingdom                                                                               | Scullion, E.; Heron, N.                                                                                                                                                                                                                                                                                                                                                                           | 2022 | Not a CPG                     |
| A Systematic Critical Appraisal of Evidence-Based Clinical Practice Guidelines for the Rehabilitation of Children With Moderate or Severe Acquired Brain Injury | Knight, S.; Takagi, M.; Fisher, E.; Anderson, V.; Lannin, N. A.; Tavender, E.; Scheinberg, A.                                                                                                                                                                                                                                                                                                     | 2019 | Not a CPG                     |
| A systematic review and quality analysis of pediatric traumatic brain injury clinical practice guidelines                                                       | Appenteng, R.; Nelp, T.; Abdelgadir, J.; Weledji, N.; Haglund, M.; Smith, E.; Obiga, O.; Sakita, F. M.; Miguel, E. A.; Vissoci, C. M.; Rice, H.; Vissoci, J. R. N.; Staton, C.                                                                                                                                                                                                                    | 2018 | Not a CPG                     |
| Accumulation of Good Intentions: How Individual Practice Guidelines Lead to Polypharmacy in the Treatment of Patients with Polytrauma                           | Brown-Taylor, L.; Jaramillo, C.; Eapen, B. C.; Kretzmer, T.; Gavin, L. P.; Cooper, T.; Pugh, M. J.                                                                                                                                                                                                                                                                                                | 2021 | Not a CPG                     |

| Title                                                                                                                     | Authors                                                                                                                                                                                                                                                                                                                                                                             | Year | Reason for exclusion          |
|---------------------------------------------------------------------------------------------------------------------------|-------------------------------------------------------------------------------------------------------------------------------------------------------------------------------------------------------------------------------------------------------------------------------------------------------------------------------------------------------------------------------------|------|-------------------------------|
| Achieving Consensus Through a Modified Delphi Technique to Create the Post-concussion Collegiate Return-to-Learn Protocol | Memmini, A. K.; Popovich, M. J.; Schuyten, K. H.; Herring, S. A.; Scott, K. L.; Clugston, J. R.; Choe, M. C.; Bailey, C. M.; Brooks, M. A.; Anderson, S. A.; McCrea, M. A.; Kontos, A. P.; Wallace, J. S.; Mihalik, J. K. R.; Kasamatsu, T. M.; McLeod, T. V.; Rawlins, M. L. W.; Snedden, T. R.; Kaplan, M.; Akani, B.; Orr, L. C. L.; Hasson, R. E.; Rifat, S. F.; Broglio, S. P. | 2022 | Recommendation not rated      |
| ACR appropriateness criteria head trauma - Child                                                                          | Ryan, M. E.; Palasis, S.; Saigal, G.; Singer, A. D.; Karmazyn, B.; Dempsey, M. E.; Dillman, J. R.; Dory, C. E.; Garber, M.; Hayes, L. L.; Iyer, R. S.; Mazzola, C. A.; Raske, M. E.; Rice, H. E.; Rigsby, C. K.; Sierzenski, P. R.; Strouse, P. J.; Westra, S. J.; Wootton-Gorges, S. L.; Coley, B. D.                                                                              | 2014 | Older version of CPG          |
| ACR Appropriateness Criteria R Head Trauma-Child                                                                          | Expert Panel on Pediatric, Imaging; Ryan, M. E.; Pruthi, S.; Desai, N. K.; Falcone, R. A., Jr.; Glenn, O. A.; Joseph, M. M.; Maheshwari, M.; Marin, J. R.; Mazzola, C.; Milla, S. S.; Mirsky, D. M.; Myseros, J. S.; Niogi, S. N.; Partap, S.; Radhakrishnan, R.; Robertson, R. L.; Soares, B. P.; Udayasankar, U. K.; Whitehead, M. T.; Wright, J. N.; Karmazyn, B.                | 2020 | Recommendations not rated     |
| ACR Appropriateness Criteria<sup> R</sup> Suspected Physical Abuse-Child                                                  | Expert Panel on Pediatric, Imaging; Wootton-Gorges, S. L.; Soares, B. P.; Alazraki, A. L.; Anupindi, S. A.; Blount, J. P.; Booth, T. N.; Dempsey, M. E.; Falcone, R. A., Jr.; Hayes, L. L.; Kulkarni, A. V.; Partap, S.; Rigsby, C. K.; Ryan, M. E.; Safdar, N. M.; Trout, A. T.; Widmann, R. F.; Karmazyn, B. K.; Palasis, S.                                                      | 2017 | Not a TBI or Homelessness CPG |
| ACR Appropriateness Criteria® Headache                                                                                    | Whitehead, Matthew T.; Cardenas, Agustin M.; Corey, Amanda S.; Policeni, Bruno; Burns, Judah; Chakraborty, Santanu; Crowley, R. Webster; Jabbour, Pascal; Ledbetter, Luke N.; Lee, Ryan K.; Pannell, Jeffrey S.; Pollock, Jeffrey M.; Powers, William J.; Setzen, Gavin; Shih, Robert Y.; Subramaniam, Rathan M.; Utukuri, Pallavi S.; Bykowski, Julie                              | 2019 | Not a TBI or Homelessness CPG |
| ACR Appropriateness Criteria® Major Blunt Trauma                                                                          | Shyu, Jeffrey Y.; Khurana, Bharti; Soto, Jorge A.; Biffl, Walter L.; Camacho, Marc A.; Diercks, Deborah B.; Glanc, Phyllis; Kalva, Sanjeeva P.; Khosa, Faisal; Meyer, Benjamin J.; Ptak, Thomas; Raja, Ali S.; Salim, Ali; West, O. Clark; Lockhart, Mark E.                                                                                                                        | 2020 | Not a TBI or Homelessness CPG |
| ACR Appropriateness Criteria® Suspected Physical Abuse-Child                                                              | Wootton-Gorges, Sandra L.; Soares, Bruno P.; Alazraki, Adina L.; Anupindi, Sudha A.; Blount, Jeffrey P.; Booth, Timothy N.; Dempsey, Molly E.; Jr.Falcone, Richard A.; Hayes, Laura L.; Kulkarni, Abhaya V.; Partap, Sonia; Rigsby, Cynthia K.; Ryan, Maura E.; Safdar, Nabile M.; Trout, Andrew T.; Widmann, Roger F.; Karmazyn, Boaz K.; Palasis, Susan; Falcone, Richard A., Jr. | 2017 | Not a TBI or Homelessness CPG |

| <b>Title</b>                                                                                                                                                                         | <b>Authors</b>                                                                                                                                                                              | <b>Year</b> | <b>Reason for exclusion</b> |
|--------------------------------------------------------------------------------------------------------------------------------------------------------------------------------------|---------------------------------------------------------------------------------------------------------------------------------------------------------------------------------------------|-------------|-----------------------------|
| Actigraphy for assessment of sleep in traumatic brain injury: case series, review of the literature and proposed criteria for use.                                                   | Zollman et al.                                                                                                                                                                              | 2010        | Recommendations not rated   |
| Acute head injury: current management guidelines                                                                                                                                     | Navarro, J. R.                                                                                                                                                                              | 1998        | No Full-Text                |
| Acute Management of Children With Traumatic Brain Injury                                                                                                                             | Ducharme-Crevier, Laurence; Wainwright, Mark                                                                                                                                                | 2015        | Recommendations not rated   |
| Acute traumatic brain injury: Is current management evidence based? An empirical analysis of systematic reviews                                                                      | Lei, Jin; Gao, Guoyi; Jiang, Jiyao                                                                                                                                                          | 2013        | Not a CPG                   |
| Addressing head injury risk in youth football: are heading guidelines the answer?                                                                                                    | Gilbert, A. W.; Bering, J. M.; Anderson, L. C.                                                                                                                                              | 2022        | Not a CPG                   |
| Adherence to Guidelines in Adult Patients with Traumatic Brain Injury: A Living Systematic Review                                                                                    | Cnossen, M. C.; Scholten, A. C.; Lingsma, H. F.; Synnot, A.; Tavender, E.; Gantner, D.; Lecky, F.; Steyerberg, E. W.; Polinder, S.                                                          | 2021        | Not a CPG                   |
| Adolescent concussions--management guidelines for schools                                                                                                                            | Lee, M. A.; Perriello, V. A., Jr.                                                                                                                                                           | 2009        | Not a CPG                   |
| Advances in Clinical Management of Persistent Postconcussion Symptoms-The Danish National Clinical Guideline                                                                         | Yeates, K. O.; Schneider, K. J.; Silverberg, N. D.                                                                                                                                          | 2021        | Not a CPG                   |
| Agitation after traumatic brain injury: considerations and treatment options                                                                                                         | Lombard et al.                                                                                                                                                                              | 2005        | Not a CPG                   |
| American Academy of Pediatrics Committee on Sports Medicine and Fitness: Horseback riding and head injuries                                                                          | Anonymous                                                                                                                                                                                   | 1992        | Paywall                     |
| American Speech-Language-Hearing Association Clinical Practice Guideline: Cognitive Rehabilitation for the Management of Cognitive Dysfunction Associated With Acquired Brain Injury | Brown, Jessica; Kaelin, Darryl; Mattingly, Erin; Mello, Catherine; Miller, E. Sam; Mitchell, Gina; Picon, Linda M.; Waldron-Perine, Brigid; Wolf, Timothy J.; Frymark, Tobi; Bowen, Rebecca | 2022        | Not a TBI CPG               |
| An appraisal of the impact of management guidelines in traumatic brain injury                                                                                                        | Myburgh, J. A.                                                                                                                                                                              | 1999        | Not a CPG                   |
| An evidence-based discussion of heading the ball and concussions in high school soccer.                                                                                              | Comstock RD, Currie DW, Pierpoint LA, Grubenhoff JA, Fields SK                                                                                                                              | 2015        | Not a CPG                   |
| An Integrated Review of the Processes and Factors Relevant to Vocational Evaluation Following Traumatic Brain Injury                                                                 | Stergiou-Kita, Mary; Dawson, Deirdre; Rappolt, Susan                                                                                                                                        | 2011        | Not a CPG                   |
| An Occupation-Based Approach to Management of Concussion: Guidelines for Practice                                                                                                    | Finn, Christina                                                                                                                                                                             | 2019        | Recommendations not rated   |
| APPENDIX A: Practice Guidelines for Traumatic Brain Injury                                                                                                                           | Anonymous                                                                                                                                                                                   | 2010        | Not a CPG                   |
| Applicability of traumatic brain injury rehabilitation interventions in natural disaster settings                                                                                    | Lee, Su Yi; Amatya, Bhasker; Judson, Rodney; Truesdale, Melinda; Reinhardt, Jan D.; Uddin, Taslim; Xiong, Xiang-Hu; Khan, Fary                                                              | 2019        | Not a CPG                   |

| Title                                                                                                                                                                        | Authors                                                                                                                                                                                                                                                                                                                                   | Year | Reason for exclusion      |
|------------------------------------------------------------------------------------------------------------------------------------------------------------------------------|-------------------------------------------------------------------------------------------------------------------------------------------------------------------------------------------------------------------------------------------------------------------------------------------------------------------------------------------|------|---------------------------|
| Application of guidelines in the management of head injuries in the emergency department. [Italian]                                                                          | Baldi, G.; Ferrarini, G.; Orlandini, A.                                                                                                                                                                                                                                                                                                   | 2001 | No Full-Text              |
| Appraisal of Clinical Practice Guideline: Centers for Disease Control and Prevention Guideline on the Diagnosis and Management of Mild Traumatic Brain Injury Among Children | Jhala, P.                                                                                                                                                                                                                                                                                                                                 | 2020 | CPG Summary               |
| Appraisal of Clinical Practice Guideline: Physical Therapy Evaluation and Treatment After Concussion/Mild Traumatic Brain Injury                                             | Dabbagh, A.; MacDermid, J. C.                                                                                                                                                                                                                                                                                                             | 2021 | Not a CPG                 |
| Appraisal of Clinical Practice Guideline: Physical Therapy Evaluation and Treatment After Concussion/Mild Traumatic Brain Injury                                             | Dabbagh, A.; MacDermid, J. C.                                                                                                                                                                                                                                                                                                             | 2021 | Review of a CPG;          |
| Approach to investigation and treatment of persistent symptoms following sport-related concussion: a systematic review                                                       | Makdissi et al.                                                                                                                                                                                                                                                                                                                           | 2017 | Recommendations not rated |
| Assessment of Evidence-Based Health and Safety Policies on Sudden Death and Concussion Management in Secondary School Athletics: A Benchmark Study                           | Adams, William M.; Scarneo, Samantha E.; Casa, Douglas J.                                                                                                                                                                                                                                                                                 | 2018 | Not a CPG                 |
| Assessment of patients with sports-related concussions...Whiteside JW. Management of head and neck injuries by the sideline physician. Am Fam Physician 2006;74:1357-62      | Barber, R. B.; Whiteside, J. W.                                                                                                                                                                                                                                                                                                           | 2007 | No Full-Text              |
| Audiological Management of Patients With Traumatic Brain Injuries and Tinnitus                                                                                               | Myers, Paula                                                                                                                                                                                                                                                                                                                              | 2018 | Not a CPG                 |
| Australian and New Zealand Guideline for Mild to Moderate Head Injuries in Children                                                                                          | Babl, Franz E.; Tavender, Emma; Ballard, Dustin W.; Borland, Meredith L.; Oakley, Ed; Cotterell, Elizabeth; Halkidis, Lambros; Goergen, Stacy; Davis, Gavin A.; Perry, David; Anderson, Vicki; Barlow, Karen M.; Barnett, Peter; Bennetts, Scott; Bhamjee, Roisin; Cole, Joanne; Craven, John; Haskell, Libby; Lawton, Ben; Lithgow, Anna | 2021 | Recommendations not rated |
| Behavior Analysis Guidelines and Brain Injury Rehabilitation: People, Principles, and Programs                                                                               | Bradberry, Edith                                                                                                                                                                                                                                                                                                                          | 1994 | Not a CPG                 |
| Behavioral and affective disorders after brain injury: French guidelines for prevention and community supports                                                               | Luaute, J.; Hamonet, J.; Pradat-Diehl, P.; Sofmer                                                                                                                                                                                                                                                                                         | 2016 | Duplicate                 |
| Best practice guideline for ending women's and girl's homelessness                                                                                                           | Van Berkum et al.                                                                                                                                                                                                                                                                                                                         | 2015 | Recommendations not rated |

| <b>Title</b>                                                                                                                                                                                                                                                    | <b>Authors</b>                                                                                                                                                                                     | <b>Year</b> | <b>Reason for exclusion</b> |
|-----------------------------------------------------------------------------------------------------------------------------------------------------------------------------------------------------------------------------------------------------------------|----------------------------------------------------------------------------------------------------------------------------------------------------------------------------------------------------|-------------|-----------------------------|
| Best practice guidelines for forensic neuropsychological examinations of patients with traumatic brain injury                                                                                                                                                   | Ruff, Ronald                                                                                                                                                                                       | 2009        | Not a CPG                   |
| Best Practices in Veteran Traumatic Brain Injury Care                                                                                                                                                                                                           | Uomoto, Jay M.                                                                                                                                                                                     | 2012        | Not a CPG                   |
| Best Practices: Best Practices for Increasing Access to SSI and SSDI on Exit From Criminal Justice Settings                                                                                                                                                     | Dennis, Deborah; Ware, Dazara; Steadman, Henry J.                                                                                                                                                  | 2014        | Not a CPG                   |
| Bilateral pupillary dilatation with normal intracranial pressure...Brain Trauma Foundation, American Association of Neurological Surgeons, Joint Section on Neurotrauma and Critical Care: Guidelines for the management of severe traumatic brain injury. J Ne | Nair, Shalini; Moorthy, Ranjith K.; Nair, Bijesh R.; Joseph, Mathew                                                                                                                                | 2014        | Not a CPG                   |
| Brain injuries in sports: Guidelines for managing concussions                                                                                                                                                                                                   | Weiner, H. R.                                                                                                                                                                                      | 2001        | CPG Summary                 |
| Brain injury as a chronic condition: implications for medical practice                                                                                                                                                                                          | Bell, Kathleen; Armstrong, Gina; Dixon, Julia Fidler; Flanagan, Stephen; Ivanhoe, Cindy; Masel, Brent E.; Swigonski, Nancy L.; Zgaljardic, Dennis                                                  | 2013        | No Full-Text                |
| Brain injury guidelines for small head injuries                                                                                                                                                                                                                 | Velmahos, G. C.                                                                                                                                                                                    | 2015        | Not a CPG                   |
| Brain injury: Seizure prophylaxis (antiepileptic drugs).                                                                                                                                                                                                        | Aginga, C                                                                                                                                                                                          | 2021        | CPG summary                 |
| British American Football Association Concussion Guidelines                                                                                                                                                                                                     | British American Football Association.                                                                                                                                                             | 2017        | Not a CPG                   |
| Canadian guideline on concussion in sport                                                                                                                                                                                                                       | Parachute                                                                                                                                                                                          | 2017        | Recommendations not rated   |
| Care of the critically ill patient with penetrating head injury                                                                                                                                                                                                 | Blissitt, P. A.                                                                                                                                                                                    | 2006        | Paywall                     |
| Caring for Patients With Closed Traumatic Brain Injury in Rural Settings                                                                                                                                                                                        | Menjugas-MacDuff, Ayda                                                                                                                                                                             | 2015        | CPG Summary                 |
| CDC's guideline on pediatric mild traumatic brain injury: Recommendations for neurologists                                                                                                                                                                      | Weissman, B.; Joseph, M.; Gronseth, G.; Sarmiento, K.; Giza, C. C.                                                                                                                                 | 2019        | CPG Summary                 |
| Chapter 1: Introduction. Guidelines for the acute medical management of severe traumatic brain injury in infants children and adolescents                                                                                                                       | Adelson, P. D.; Bratton, S. L.; Carney, N. A.; Chesnut, R. M.; Du Coudray, H. E. M.; Goldstein, B.; Kochanek, P. M.; Miller, H. C.; Partington, M. D.; Selden, N. R.; Warden, C. R.; Wright, D. W. | 2003        | Duplicate                   |
| Chapter 10. The role of cerebrospinal fluid drainage in the treatment of severe pediatric traumatic brain injury                                                                                                                                                | Adelson, P. D.; Bratton, S. L.; Carney, N. A.; Chesnut, R. M.; Du Coudray, H. E. M.; Goldstein, B.; Kochanek, P. M.; Miller, H. C.; Partington, M. D.; Selden, N. R.; Warden, C. R.; Wright, D. W. | 2003        | Duplicate                   |

| Title                                                                                                                       | Authors                                                                                                                                                                                            | Year | Reason for exclusion |
|-----------------------------------------------------------------------------------------------------------------------------|----------------------------------------------------------------------------------------------------------------------------------------------------------------------------------------------------|------|----------------------|
| Chapter 11. Use of hyperosmolar therapy in the management of severe pediatric traumatic brain injury                        | Adelson, P. D.; Bratton, S. L.; Carney, N. A.; Chesnut, R. M.; Du Coudray, H. E. M.; Goldstein, B.; Kochanek, P. M.; Miller, H. C.; Partington, M. D.; Selden, N. R.; Warden, C. R.; Wright, D. W. | 2003 | Duplicate            |
| Chapter 12. Use of hyperventilation in the acute management of severe pediatric traumatic brain injury                      | Adelson, P. D.; Bratton, S. L.; Carney, N. A.; Chesnut, R. M.; Du Coudray, H. E. M.; Goldstein, B.; Kochanek, P. M.; Miller, H. C.; Partington, M. D.; Selden, N. R.; Warden, C. R.; Wright, D. W. | 2003 | Duplicate            |
| Chapter 13. The use of barbiturates in the control of intracranial hypertension in severe pediatric traumatic brain injury  | Adelson, P. D.; Bratton, S. L.; Carney, N. A.; Chesnut, R. M.; Du Coudray, H. E. M.; Goldstein, B.; Kochanek, P. M.; Miller, H. C.; Partington, M. D.; Selden, N. R.; Warden, C. R.; Wright, D. W. | 2003 | Duplicate            |
| Chapter 14. The role of temperature control following severe pediatric traumatic brain injury                               | Adelson, P. D.; Bratton, S. L.; Carney, N. A.; Chesnut, R. M.; Du Coudray, H. E. M.; Goldstein, B.; Kochanek, P. M.; Miller, H. C.; Partington, M. D.; Selden, N. R.; Warden, C. R.; Wright, D. W. | 2003 | Duplicate            |
| Chapter 15. Surgical treatment of pediatric intracranial hypertension                                                       | Adelson, P. D.; Bratton, S. L.; Carney, N. A.; Chesnut, R. M.; Du Coudray, H. E. M.; Goldstein, B.; Kochanek, P. M.; Miller, H. C.; Partington, M. D.; Selden, N. R.; Warden, C. R.; Wright, D. W. | 2003 | Duplicate            |
| Chapter 16. The use of corticosteroids in the treatment of severe pediatric traumatic brain injury                          | Adelson, P. D.; Bratton, S. L.; Carney, N. A.; Chesnut, R. M.; Du Coudray, H. E. M.; Goldstein, B.; Kochanek, P. M.; Miller, H. C.; Partington, M. D.; Selden, N. R.; Warden, C. R.; Wright, D. W. | 2003 | Duplicate            |
| Chapter 17. Critical pathway for the treatment of established intracranial hypertension in pediatric traumatic brain injury | Adelson, P. D.; Bratton, S. L.; Carney, N. A.; Chesnut, R. M.; Du Coudray, H. E. M.; Goldstein, B.; Kochanek, P. M.; Miller, H. C.; Partington, M. D.; Selden, N. R.; Warden, C. R.; Wright, D. W. | 2003 | Duplicate            |
| Chapter 18. Nutritional support                                                                                             | Adelson, P. D.; Bratton, S. L.; Carney, N. A.; Chesnut, R. M.; Du Coudray, H. E. M.; Goldstein, B.; Kochanek, P. M.; Miller, H. C.; Partington, M. D.; Selden, N. R.; Warden, C. R.; Wright, D. W. | 2003 | Duplicate            |
| Chapter 19. The role of anti-seizure prophylaxis following severe pediatric traumatic brain injury                          | Adelson, P. D.; Bratton, S. L.; Carney, N. A.; Chesnut, R. M.; Du Coudray, H. E. M.; Goldstein, B.; Kochanek, P. M.; Miller, H. C.; Partington, M. D.; Selden, N. R.; Warden, C. R.; Wright, D. W. | 2003 | Duplicate            |
| Chapter 2: trauma systems, pediatric trauma centers, and the neurosurgeon                                                   | Adelson, P. D.; Bratton, S. L.; Carney, N. A.; Chesnut, R. M.; Du Coudray, H. E. M.; Goldstein, B.; Kochanek, P. M.; Miller, H. C.; Partington, M. D.; Selden, N. R.; Warden, C. R.; Wright, D. W. | 2003 | Duplicate            |
| Chapter 3. Prehospital airway management                                                                                    | Adelson, P. D.; Bratton, S. L.; Carney, N. A.; Chesnut, R. M.; Du Coudray, H. E. M.; Goldstein, B.; Kochanek, P. M.; Miller, H. C.; Partington, M. D.; Selden, N. R.; Warden, C. R.; Wright, D. W. | 2003 | Duplicate            |

| Title                                                                                                                                                                                              | Authors                                                                                                                                                                                                                                                                                                                                                                                               | Year | Reason for exclusion    |
|----------------------------------------------------------------------------------------------------------------------------------------------------------------------------------------------------|-------------------------------------------------------------------------------------------------------------------------------------------------------------------------------------------------------------------------------------------------------------------------------------------------------------------------------------------------------------------------------------------------------|------|-------------------------|
| Chapter 5. Indications for intracranial pressure monitoring in pediatric patients with severe traumatic brain injury                                                                               | Adelson, P. D.; Bratton, S. L.; Carney, N. A.; Chesnut, R. M.; Du Coudray, H. E. M.; Goldstein, B.; Kochanek, P. M.; Miller, H. C.; Partington, M. D.; Selden, N. R.; Warden, C. R.; Wright, D. W.                                                                                                                                                                                                    | 2003 | Duplicate               |
| Chapter 7. Intracranial pressure monitoring technology                                                                                                                                             | Adelson, P. D.; Bratton, S. L.; Carney, N. A.; Chesnut, R. M.; Du Coudray, H. E. M.; Goldstein, B.; Kochanek, P. M.; Miller, H. C.; Partington, M. D.; Selden, N. R.; Warden, C. R.; Wright, D. W.                                                                                                                                                                                                    | 2003 | Duplicate               |
| Chapter 8. Cerebral perfusion pressure                                                                                                                                                             | Adelson, P. D.; Bratton, S. L.; Carney, N. A.; Chesnut, R. M.; Du Coudray, H. E. M.; Goldstein, B.; Kochanek, P. M.; Miller, H. C.; Partington, M. D.; Selden, N. R.; Warden, C. R.; Wright, D. W.                                                                                                                                                                                                    | 2003 | Duplicate               |
| Chapter 9. Use of sedation and neuromuscular blockade in the treatment of severe pediatric traumatic brain injury                                                                                  | Adelson, P. D.; Bratton, S. L.; Carney, N. A.; Chesnut, R. M.; Du Coudray, H. E. M.; Goldstein, B.; Kochanek, P. M.; Miller, H. C.; Partington, M. D.; Selden, N. R.; Warden, C. R.; Wright, D. W.                                                                                                                                                                                                    | 2003 | Duplicate               |
| Child physical abuse: Assessment and reporting guidelines                                                                                                                                          | Tokarski, Penny                                                                                                                                                                                                                                                                                                                                                                                       | 1988 | No Full-Text            |
| Chronic Care of persons with ABI between the age of 18 and 65 years                                                                                                                                | Engelien, L., David, L., Ward, V. H., Ackaert, K., Murielle, L., Mark, L., Thierry, D. B., & Marijke, E.                                                                                                                                                                                                                                                                                              | 2007 | Not a CPG               |
| Classification of disease severity for neuro- and trauma rehabilitation Part 1: instruments for stroke and traumatic brain injury                                                                  | AIHTA, Ludwig Boltzmann Institute                                                                                                                                                                                                                                                                                                                                                                     | 2009 | Cannot locate full-text |
| Clinical guideline for homeless and vulnerably housed people, and people with lived homelessness experience. [Spanish]                                                                             | Pottie, K.; Kendall, C. E.; Aubry, T.; Magwood, O.; Andermann, A.; Salvalaggio, G.; Ponka, D.; Bloch, G.; Brcic, V.; Agbata, E.; Thavorn, K.; Hannigan, T.; Bond, A.; Crouse, S.; Goel, R.; Shoemaker, E.; Wang, J. Z. J.; Mott, S.; Kaur, H.; Mathew, C.; Hashmi, S. S.; Saad, A.; Piggott, T.; Arya, N.; Kozloff, N.; Beder, M.; Guenter, D.; Muckle, W.; Hwang, S.; Stergiopoulos, V.; Tugwell, P. | 2020 | CPG translation         |
| Clinical guidelines for traumatic brain injuries in children and boys                                                                                                                              | Derakhshanfar, H.; Pourbakhtyaran, E.; Rahimi, S.; Sayyah, S.; Soltantooyeh, Z.; Karbasian, F.                                                                                                                                                                                                                                                                                                        | 2020 | Duplicate               |
| Clinical guidelines for traumatic brain injuries in children and boys                                                                                                                              | Derakhshanfar, H.; Pourbakhtyaran, E.; Rahimi, S.; Sayyah, S.; Soltantooyeh, Z.; Karbasian, F.                                                                                                                                                                                                                                                                                                        | 2020 | CPG Summary             |
| Clinical management update. Scandinavian guidelines for initial management of minimal, mild, and moderate head injuries                                                                            | Ingebrigtsen, T.; Romner, B.; Kock-Jensen, C.                                                                                                                                                                                                                                                                                                                                                         | 2000 | Duplicate               |
| Clinical policy: Neuroimaging and decisionmaking in adult mild traumatic brain injury in the acute setting                                                                                         | Jagoda et al.                                                                                                                                                                                                                                                                                                                                                                                         | 2008 | Older version of CPG    |
| Clinical practice guideline recommendations for the management of challenging behaviours after traumatic brain injury in acute hospital and inpatient rehabilitation settings: a systematic review | Block, H.; Paul, M.; Muir-Cochrane, E.; Bellon, M.; George, S.; Hunter, S. C.                                                                                                                                                                                                                                                                                                                         | 2023 | Not a CPG               |

| <b>Title</b>                                                                                                                                       | <b>Authors</b>                                                                                                                                                                                                                                                  | <b>Year</b> | <b>Reason for exclusion</b>       |
|----------------------------------------------------------------------------------------------------------------------------------------------------|-----------------------------------------------------------------------------------------------------------------------------------------------------------------------------------------------------------------------------------------------------------------|-------------|-----------------------------------|
| Clinical practice guideline series update                                                                                                          | Thompson, Hilaire                                                                                                                                                                                                                                               | 2011        | Not a CPG                         |
| Clinical Practice Guideline to Improve Locomotor Function Following Chronic Stroke, Incomplete Spinal Cord Injury, and Brain Injury                | Hornby, T. George; Reisman, Darcy S.; Ward, Irene G.; Scheets, Patricia L.; Miller, Allison; Haddad, David; Fox, Emily J.; Fritz, Nora E.; Hawkins, Kelly; Henderson, Christopher E.; Hendron, Kathryn L.; Holleran, Carey L.; Lynskey, James E.; Walter, Amber | 2020        | Not a TBI or Homelessness CPG     |
| Clinical practice guideline: multidisciplinary guidelines on the identification, investigation and management of suspected abusive head trauma     | Canadian Paediatric Society                                                                                                                                                                                                                                     | 2007        | Recommendations not rated         |
| Clinical practice guidelines for mild traumatic brain injury and persistent symptoms                                                               | Marshall, S.; Bayley, M.; McCullagh, S.; Velikonja, D.; Berrigan, L.                                                                                                                                                                                            | 2012        | Not a CPG                         |
| Clinical Practice Guidelines for Occupational Therapists in the Evaluation and Treatment of Oculomotor Impairment Following Traumatic Brain Injury | Aravich, D.; Troxell, L.                                                                                                                                                                                                                                        | 2021        | Recommendations not rated         |
| Clinical practice guidelines for rehabilitation in traumatic brain injury: A critical appraisal                                                    | Lee, Su Yi; Amatya, Bhasker; Judson, Rodney; Truesdale, Melinda; Reinhardt, Jan D.; Uddin, Taslim; Xiong, Xiang-Hu; Khan, Fary                                                                                                                                  | 2019        | Duplicate                         |
| Clinical practice guidelines for rehabilitation in traumatic brain injury: a critical appraisal                                                    | Lee, S. Y.; Amatya, B.; Judson, R.; Truesdale, M.; Reinhardt, J. D.; Uddin, T.; Xiong, X. H.; Khan, F.                                                                                                                                                          | 2019        | Not a CPG                         |
| Clinical practice guidelines for the care of patients with severe traumatic brain injury: A systematic evaluation of their quality                 | Alarcon, J. D.; Rubiano, A. M.; Chirinos, M. S.; Valderrama, A.; Gich, I.; Bonfill, X.; Alonso-Coello, P.                                                                                                                                                       | 2013        | Not a CPG                         |
| Clinical practice guidelines for the management of conditions related to traffic collisions: a systematic review by the OPTIMA Collaboration       | Wong, Jessica J.; C t, Pierre; Shearer, Heather M.; Carroll, Linda J.; Yu, Hainan; Varatharajan, Sharanya; Southerst, Danielle; van der Velde, Gabrielle; Jacobs, Craig; Taylor-Vaisey, Anne                                                                    | 2015        | Not a TBI or Homelessness CPG     |
| Clinical practice guidelines: Trauma/traumatic brain injury                                                                                        | Queensland Ambulance Service                                                                                                                                                                                                                                    | 2021        | Recommendations not rated         |
| Clinical standard of neurosurgical disorder (2) management of mild traumatic brain injury. [Japanese]                                              | Shima, K.                                                                                                                                                                                                                                                       | 2009        | Paywall                           |
| Concussion (mild traumatic brain injury) and the team physician: a consensus statement                                                             | Herring et al.                                                                                                                                                                                                                                                  | 2011        | Recommendations not rated         |
| Concussion assessment and management                                                                                                               | King, D.                                                                                                                                                                                                                                                        | 2009        | Recommendations not rated         |
| Concussion Guidelines for Basketball in Great Britain 2016-KEY POINTS SUMMARY. 2                                                                   | British Basketball                                                                                                                                                                                                                                              | 2016        | Not a CPG                         |
| Concussion Guidelines for health professionals                                                                                                     | New Brunswick Trauma Program                                                                                                                                                                                                                                    | 2016        | English translation not available |



| <b>Title</b>                                                                                                                                                          | <b>Authors</b>                                                                                                                                                                                                                                                                                                                                | <b>Year</b> | <b>Reason for exclusion</b> |
|-----------------------------------------------------------------------------------------------------------------------------------------------------------------------|-----------------------------------------------------------------------------------------------------------------------------------------------------------------------------------------------------------------------------------------------------------------------------------------------------------------------------------------------|-------------|-----------------------------|
| Concussion guidelines in national and international professional and elite sports                                                                                     | Davis, G. A.; Makkissi, M.; Bloomfield, P.; Clifton, P.; Cowie, C.; Echemendia, R.; Falvey, E. C.; Fuller, G. W.; Green, G. A.; Harcourt, P.; Hill, J.; Leahy, K.; Loosemore, M. P.; McCrory, P.; McGoldrick, A.; Meeuwisse, W.; Moran, K.; Nagahiro, S.; Orchard, J. W.; Pugh, J.; Raftery, M.; Sills, A. K.; Solomon, G. S.; Valadka, A. B. | 2020        | Not a CPG                   |
| Concussion guidelines in national and international professional and elite sports                                                                                     | Maddocks, D. L.; Perry, R. W.                                                                                                                                                                                                                                                                                                                 | 2020        | Not a CPG                   |
| Concussion guidelines step 1: Systematic review of prevalent indicators                                                                                               | Carney, N.; Ghajar, J.; Jagoda, A.; Bedrick, S.; Davis-O'Reilly, C.; Du Coudray, H.; Hack, D.; Helfand, N.; Huddleston, A.; Nettleton, T.; Riggio, S.                                                                                                                                                                                         | 2014        | Not a CPG                   |
| Concussion Guidelines.                                                                                                                                                | Fédération Internationale de Gymnastique                                                                                                                                                                                                                                                                                                      | 2020        | Recommendation not rated    |
| Concussion in children and adolescents: Exercise.                                                                                                                     | Fong, E.                                                                                                                                                                                                                                                                                                                                      | 2022        | CPG summary                 |
| Concussion in Head Trauma                                                                                                                                             | Key, V. H.; Noland, J. B.                                                                                                                                                                                                                                                                                                                     | 2022        | Not a CPG                   |
| Concussion in sports. Guidelines for the prevention of catastrophic outcome                                                                                           | Kelly, J. P.; Nichols, J. S.; Filley, C. M.; Lillehei, K. O.; Rubinstein, D.; Kleinschmidt-DeMasters, B. K.                                                                                                                                                                                                                                   | 1991        | Not a CPG                   |
| Concussion Management Guidelines for Gaelic Games                                                                                                                     | Gaelic Athletic Association.                                                                                                                                                                                                                                                                                                                  | 2018        | Not a CPG                   |
| Concussion Management Guidelines for Certified Athletic Therapists in Quebec                                                                                          | Quebec Corporation of Athletic Therapists                                                                                                                                                                                                                                                                                                     | 2014        | Recommendations not rated   |
| Concussion: Prevention, assessment, and management                                                                                                                    | Granitto, Margaret H.; Norton, Colleen                                                                                                                                                                                                                                                                                                        | 2018        | CPG Summary                 |
| Concussions in sports: Guidelines for return to competition                                                                                                           | Leblanc, K. E.                                                                                                                                                                                                                                                                                                                                | 1994        | No Full-Text                |
| Concussive convulsions. Incidence in sport and treatment recommendations                                                                                              | McCrory et al.                                                                                                                                                                                                                                                                                                                                | 1998        | Recommendations not rated   |
| Consciousness Guidelines Affect Continuation of Care                                                                                                                  | Ahc, Media                                                                                                                                                                                                                                                                                                                                    | 2018        | Not a CPG                   |
| Consensus conference. Rehabilitation of persons with traumatic brain injury. NIH Consensus Development Panel on Rehabilitation of Persons With Traumatic Brain Injury | No authors listed                                                                                                                                                                                                                                                                                                                             | 1999        | Not a CPG                   |
| Consensus guidelines on screening for hypopituitarism following traumatic brain injury                                                                                | Ghigo, E.; Masel, B.; Aimaretti, G.; Leon-Carrion, J.; Casanueva, F. F.; Dominguez-Morales, M. R.; Elovic, E.; Perrone, K.; Stalla, G.; Thompson, C.; Urban, R.                                                                                                                                                                               | 2005        | Recommendations not rated   |
| Consensus statement on Concussion in Sport - The 4th International Conference on Concussion in Sport held in Zurich, November 2012                                    | McCrory, Paul; Meeuwisse, Willem; Aubry, Mark; Cantu, Bob; Dvorak, Jiri; Echemendia, Ruben; Engebretsen, Lars; Johnston, Karen; Kutcher, Jeff; Raftery, Martin; Sills, Allen; Benson, Brian; Davis, Gavin; Ellenbogen, Richard; Guskiewicz, Kevin; Herring, Stanley A.; Iverson, Grant; Jordan, Barry; Kissick, James; McCrea, Michael        | 2013        | Duplicate                   |

| Title                                                                                                                                         | Authors                                                                                                                                                                                                                                                                                                                                                                                                         | Year | Reason for exclusion      |
|-----------------------------------------------------------------------------------------------------------------------------------------------|-----------------------------------------------------------------------------------------------------------------------------------------------------------------------------------------------------------------------------------------------------------------------------------------------------------------------------------------------------------------------------------------------------------------|------|---------------------------|
| Consensus statement on Concussion in Sport - The 4th International Conference on Concussion in Sport held in Zurich, November 2012            | McCrory, P.; Meeuwisse, W.; Aubry, M.; Cantu, B.; Dvorak, J.; Echemendia, R.; Engebretsen, L.; Johnston, K.; Kutcher, J.; Raftery, M.; Sills, A.; Benson, B.; Davis, G.; Ellenbogen, R.; Guskiewicz, K.; Herring, S. A.; Iverson, G.; Jordan, B.; Kissick, J.; McCrea, M.; McIntosh, A.; Maddocks, D.; Makdissi, M.; Purcell, L.; Putukian, M.; Schneider, K.; Tator, C.; Turner, M.                            | 2013 | Duplicate                 |
| Consensus statement on concussion in sport - The 4th International conference on concussion in sport held in Zurich, November 2012            | McCrory, P.; Meeuwisse, W.; Aubry, M.; Cantu, B.; Dvorak, J.; Echemendia, R. J.; Engebretsen, L.; Johnston, K.; Kutcher, J.S.; Raftery, M.; Sills, A.                                                                                                                                                                                                                                                           | 2013 | Duplicate                 |
| Consensus Statement on Concussion in Sport: The 4(th) International Conference on Concussion in Sport Held in Zurich, November 2012           | McCrory, Paul; Meeuwisse, Willem H.; Aubry, Mark; Cantu, Bob; Dvořák, Jiří; Echemendia, Ruben J.; Engebretsen, Lars; Johnston, Karen; Kutcher, Jeffrey S.; Raftery, Martin; Sills, Allen; Benson, Brian W.; Davis, Gavin A.; Ellenbogen, Richard; Guskiewicz, Kevin; Herring, Stanley A.; Iverson, Grant L.; Jordan, Barry D.; Kissick, James; McCrea, Michael                                                  | 2013 | Duplicate                 |
| Consensus statement on concussion in sport: The 4 <sup>th</sup> international conference on concussion in sport held in Zurich, November 2012 | McCrory, P.; Meeuwisse, W. H.; Aubry, M.; Cantu, B.; Dvorak, J.; Echemendia, R. J.; Engebretsen, L.; Johnston, K.; Kutcher, J. S.; Raftery, M.; Sills, A.; Benson, B. W.; Davis, G. A.; Ellenbogen, R.; Guskiewicz, K.; Herring, S. A.; Iverson, G. L.; Jordan, B. D.; Kissick, J.; McCrea, M.; McIntosh, A. S.; Maddocks, D.; Makdissi, M.; Purcell, L.; Putukian, M.; Schneider, K.; Tator, C. H.; Turner, M. | 2013 | Duplicate                 |
| Consensus statement on concussion in sport: the 4th International Conference on Concussion in Sport held in Zurich, November 2012             | McCrory, Paul; Meeuwisse, Willem H.; Aubry, Mark; Cantu, Bob; Dvořák, Jiří; Echemendia, Ruben J.; Engebretsen, Lars; Johnston, Karen; Kutcher, Jeffrey S.; Raftery, Martin; Sills, Allen; Benson, Brian W.; Davis, Gavin A.; Ellenbogen, Richard G.; Guskiewicz, Kevin; Herring, Stanley A.; Iverson, Grant L.; Jordan, Barry D.; Kissick, James; McCrea, Michael                                               | 2013 | Duplicate                 |
| Consensus Statement on Concussion in Sport: The 4th International Conference on Concussion in Sport, Zurich, November 2012                    | McCrory, Paul; Meeuwisse, Willem H.; Aubry, Mark; Cantu, Robert C.; Dvořák, Jiří; Echemendia, Ruben J.; Engebretsen, Lars; Johnston, Karen; Kutcher, Jeffrey S.; Raftery, Martin; Sills, Allen; Benson, Brian W.; Davis, Gavin A.; Ellenbogen, Richard; Guskiewicz, Kevin M.; Herring, Stanley A.; Iverson, Grant L.; Jordan, Barry D.; Kissick, James; McCrea, Michael                                         | 2013 | Duplicate                 |
| Consensus statement on Concussion in Sport-The 4th International Conference on Concussion in Sport held in Zurich, November 2012              | McCrory, P.; Meeuwisse, W.; Aubry, M.; Cantu, B.; Dvorak, J.; Echemendia, R.; Engebretsen, L.; Johnston, K.; Kutcher, J.; Raftery, M.; Sills, A.; Benson, B.; Davis, G.; Ellenbogen, R.; Guskiewicz, K.; Herring, S. A.; Iverson, G.; Jordan, B.; Kissick, J.; McCrea, M.; McIntosh, A.; Maddocks, D.; Makdissi, M.; Purcell, L.; Putukian, M.; Schneider, K.; Tator, C.; Turner, M.                            | 2013 | Recommendations not rated |

| Title                                                                                                                                       | Authors                                                                                                                                                                                                                                                                                                                                                                                                                                                                                                                                | Year | Reason for exclusion      |
|---------------------------------------------------------------------------------------------------------------------------------------------|----------------------------------------------------------------------------------------------------------------------------------------------------------------------------------------------------------------------------------------------------------------------------------------------------------------------------------------------------------------------------------------------------------------------------------------------------------------------------------------------------------------------------------------|------|---------------------------|
| Consensus Statement on Concussion in Sport-The 4th International Conference on Concussion in Sport Held in Zurich, November 2012            | McCrory, P.; Meeuwisse, W. H.; Aubry, M.; Cantu, R. C.; Dvorak, J.; Echemendia, R. J.; Engebretsen, L.; Johnston, K. M.; Kutcher, J. S.; Raftery, M.; Sills, A.; Benson, B. W.; Davis, G. A.; Ellenbogen, R.; Guskiewicz, K. M.; Herring, S. A.; Iverson, G. L.; Jordan, B. D.; Kissick, J.; McCrea, M.; McIntosh, A. S.; Maddocks, D. L.; Makdissi, M.; Purcell, L.; Putukian, M.; Schneider, K.; Tator, C. H.; Turner, M.                                                                                                            | 2013 | Duplicate                 |
| Consensus statement on Concussion in Sport--the 4th International Conference on Concussion in Sport held in Zurich, November 2012           | McCrory, Paul; Meeuwisse, Willem; Aubry, Mark; Cantu, Bob; Dvorak, Jiri; Echemendia, Ruben; Engebretsen, Lars; Johnston, Karen; Kutcher, Jeff; Raftery, Martin; Sills, Allen; Benson, Brian; Davis, Gavin; Ellenbogen, Richard; Guskiewicz, Kevin; Herring, Stanley A.; Iverson, Grant; Jordan, Barry; Kissick, James; McCrea, Michael                                                                                                                                                                                                 | 2013 | Duplicate                 |
| Consensus statement on concussion in sport--the 4th International Conference on Concussion in Sport held in Zurich, November 2012           | McCrory, P.; Meeuwisse, W.; Aubry, M.; Cantu, B.; Dvorak, J.; Echemendia, R. J.; Engebretsen, L.; Johnston, K.; Kutcher, J. S.; Raftery, M.; Sills, A.; Kathryn Schneider, P. T. PhD Charles H. Tator M. D. P. H. D.; Benson, B. W.; Davis, G. A.; Ellenbogen, R. G.; Guskiewicz, K. M.; Herring, S. A.; Iverson, G.; Jordan, B. D.; Kissick, J.; McCrea, M.; McIntosh, A. S.; Maddocks, D. L.; Makdissi, M.; Purcell, L.; Putukian, M.; Turner, M.; Schneider, K.; Tator, C. H.                                                       | 2013 | Duplicate                 |
| Consensus statement on concussion in sport--the 4th International Conference on Concussion in Sport held in Zurich, November 2012           | McCrory, Paul; Meeuwisse, Willem H.; Aubry, Mark; Cantu, Robert C.; Dvořák, Jiří; Echemendia, Ruben J.; Engebretsen, Lars; Johnston, Karen M.; Kutcher, Jeffrey S.; Raftery, Martin; Sills, Allen; Benson, Brian W.; Davis, Gavin A.; Ellenbogen, Richard; Guskiewicz, Kevin M.; Herring, Stanley A.; Iverson, Grant L.; Jordan, Barry D.; Kissick, James; McCrea, Michael                                                                                                                                                             | 2013 | Duplicate                 |
| Consensus statement on concussion in sport-the 5 <sup>th</sup> international conference on concussion in sport held in Berlin, October 2016 | McCrory, P.; Meeuwisse, W.; Dvorak, J.; Aubry, M.; Bailes, J.; Broglio, S.; Cantu, R. C.; Cassidy, D.; Echemendia, R. J.; Castellani, R. J.; Davis, G. A.; Ellenbogen, R.; Emery, C.; Engebretsen, L.; Feddermann-Demont, N.; Giza, C. C.; Guskiewicz, K. M.; Herring, S.; Iverson, G. L.; Johnston, K. M.; Kissick, J.; Kutcher, J.; Leddy, J. J.; Maddocks, D.; Makdissi, M.; Manley, G. T.; McCrea, M.; Meehan, W. P.; Nagahiro, S.; Patricios, J.; Putukian, M.; Schneider, K. J.; Sills, A.; Tator, C. H.; Turner, M.; Vos, P. E. | 2017 | Recommendations not rated |
| Consensus Statement on Sports-Related Concussions in Youth Sports Using a Modified Delphi Approach                                          | Rivara, F. P.; Tennyson, R.; Mills, B.; Browd, S. R.; Emery, C. A.; Gioia, G.; Giza, C. C.; Herring, S.; Janz, K. F.; Labella, C.; Valovich McLeod, T.; Meehan, W.; Patricios, J.                                                                                                                                                                                                                                                                                                                                                      | 2020 | Recommendations not rated |

| Title                                                                                                                                                                                                                                                           | Authors                                                                                                                                                                                                                                                                                                                                                                                                                                                                       | Year | Reason for exclusion          |
|-----------------------------------------------------------------------------------------------------------------------------------------------------------------------------------------------------------------------------------------------------------------|-------------------------------------------------------------------------------------------------------------------------------------------------------------------------------------------------------------------------------------------------------------------------------------------------------------------------------------------------------------------------------------------------------------------------------------------------------------------------------|------|-------------------------------|
| Consensus summary statement of the International Multidisciplinary Consensus Conference on Multimodality Monitoring in Neurocritical Care : a statement for healthcare professionals from the Neurocritical Care Society and the European Society of Intensive  | Le Roux, Peter; Menon, David K.; Citerio, Giuseppe; Vespa, Paul; Bader, Mary Kay; Brophy, Gretchen M.; Diring, Michael N.; Stocchetti, Nino; Videtta, Walter; Armonda, Rocco; Badjatia, Neeraj; Bösel, Julian; Chesnut, Randall; Chou, Sherry; Claassen, Jan; Czosnyka, Marek; De Georgia, Michael; Figaji, Anthony; Fugate, Jennifer; Helbok, Raimund                                                                                                                        | 2014 | Not a TBI or Homelessness CPG |
| Consensus summary statement of the International Multidisciplinary Consensus Conference on Multimodality Monitoring in Neurocritical Care: a statement for healthcare professionals from the Neurocritical Care Society and the European Society of Intensive C | Le Roux, Peter; Menon, David K.; Citerio, Giuseppe; Vespa, Paul; Bader, Mary Kay; Brophy, Gretchen M.; Diring, Michael N.; Stocchetti, Nino; Videtta, Walter; Armonda, Rocco; Badjatia, Neeraj; Bösel, Julian; Chesnut, Randall; Chou, Sherry; Claassen, Jan; Czosnyka, Marek; De Georgia, Michael; Figaji, Anthony; Fugate, Jennifer; Helbok, Raimund                                                                                                                        | 2014 | Not a TBI or Homelessness CPG |
| Consensus Summary Statement of the International Multidisciplinary Consensus Conference on Multimodality Monitoring in Neurocritical Care: A statement for healthcare professionals from the Neurocritical Care Society and the European Society of Intensive C | Le Roux, P.; Menon, D. K.; Citerio, G.; Vespa, P.; Bader, M. K.; Brophy, G. M.; Diring, M. N.; Stocchetti, N.; Videtta, W.; Armonda, R.; Badjatia, N.; Boesel, J.; Chesnut, R.; Chou, S.; Claassen, J.; Czosnyka, M.; De Georgia, M.; Figaji, A.; Fugate, J.; Helbok, R.; Horowitz, D.; Hutchinson, P.; Kumar, M.; McNett, M.; Miller, C.; Naidech, A.; Oddo, M.; Olson, D. W.; O'Phelan, K.; Provencio, J. J.; Puppo, C.; Riker, R.; Robertson, C.; Schmidt, M.; Taccone, F. | 2014 | Not a CPG                     |
| Considerations for neurosurgeons: recommendations from the CDC Pediatric Mild Traumatic Brain Injury Guideline                                                                                                                                                  | Timmons, S. D.; Waltzman, D.; Duhaime, A. C.; Spinks, T. J.; Sarmiento, K.                                                                                                                                                                                                                                                                                                                                                                                                    | 2019 | CPG Summary                   |
| Correction: Centers for disease control and prevention guideline on the diagnosis and management of mild traumatic (JAMA Pediatr (2018) e182853 DOI: 10.1001/jamapediatrics.2018.2853)                                                                          | Anonymous                                                                                                                                                                                                                                                                                                                                                                                                                                                                     | 2018 | Not a CPG                     |
| Critical Assessment of the Guidelines-Based Management of Severe Traumatic Brain Injury with the AGREE-II                                                                                                                                                       | Karagianni, M. D.; Tasiou, A.; Brotis, A. G.; Tzerefos, C.; Lambrianou, X.; Alkiviadis, T.; Kalogeras, A.; Spiliotopoulos, T.; Arvaniti, C.; Papageorgakopoulou, M.; Gatos, C.; Fountas, K. N.                                                                                                                                                                                                                                                                                | 2023 | Review of a CPG               |
| Critical evaluation of the existing guidelines on mild traumatic brain injury                                                                                                                                                                                   | Peloso, P. M.; Carroll, L. J.; Cassidy, J. D.; Borg, J.; von Holst, H.; Holm, L.; Yates, D.                                                                                                                                                                                                                                                                                                                                                                                   | 2004 | Not a CPG                     |
| Critical pathway for the treatment of established intracranial hypertension. Brain Trauma Foundation                                                                                                                                                            | Anonymous                                                                                                                                                                                                                                                                                                                                                                                                                                                                     | 1996 | Older version of CPG          |
| Critical Update on the Third Edition of the Guidelines for Managing Severe Traumatic Brain Injury in Children                                                                                                                                                   | Reuter-Rice, K.; Christoferson, E.                                                                                                                                                                                                                                                                                                                                                                                                                                            | 2020 | CPG Summary                   |
| Current recommendations for the diagnosis and treatment of concussion in sport: A comparison of three new guidelines                                                                                                                                            | West, T. A.; Marion, D. W.                                                                                                                                                                                                                                                                                                                                                                                                                                                    | 2014 | Not a CPG                     |

| <b>Title</b>                                                                                                                                                         | <b>Authors</b>                                                                                                          | <b>Year</b> | <b>Reason for exclusion</b>   |
|----------------------------------------------------------------------------------------------------------------------------------------------------------------------|-------------------------------------------------------------------------------------------------------------------------|-------------|-------------------------------|
| Decompressive Craniectomy in the Management of Low Glasgow Coma Score Patients With Extradural Hematoma: A Review of Literature and Guidelines                       | Bisen, Y. T.; Korde, P.; Dighe, O.; Iratwar, S.; Bisen, G.                                                              | 2023        | Recommendations not rated     |
| Developing guidelines for return to play: Consensus and evidence-based approaches                                                                                    | Echemendia, R. J.; Giza, C. C.; Kutcher, J. S.                                                                          | 2015        | CPG Summary                   |
| Developing Nutrition Guidelines for Recycled Food to Improve Food Security Among Homeless, Asylum Seekers, and Refugees in Victoria, Australia                       | Wilson, A.; Szwed, N.; Renzaho, A.                                                                                      | 2012        | Not a TBI or Homelessness CPG |
| Developing return-to-play guidelines following mild traumatic brain injury                                                                                           | Stevenson, M.                                                                                                           | 2003        | Not a CPG                     |
| Development and evaluation of a clinical practice guideline to promote evidence-based treatment of pediatric concussions in primary care                             | Mortenson, Brett Jerome                                                                                                 | 2016        | Adaptation of a CPG           |
| Development of a concussion public policy on prevention, management and education for schools using expert consensus                                                 | Mylabathula, S.; Macarthur, C.; Guttmann, A.; Colantonio, A.; Tator, C.                                                 | 2022        | Recommendation not rated      |
| Development of clinical guidelines for the prescription of a seated wheelchair or mobility scooter for people with traumatic brain injury or spinalcord injury       | Lukersmith, S.; Radbron, L.; Hopman, K.                                                                                 | 2013        | Not a TBI or Homelessness CPG |
| Development of Clinical Recommendations for Progressive Return to Activity After Military Mild Traumatic Brain Injury: Guidance for Rehabilitation Providers         | McCulloch, Karen L.; Goldman, Sarah; Lowe, Lynn; Radomski, Mary Vining; Reynolds, John; Shapiro, Rita; West, Therese A. | 2015        | Recommendations not rated     |
| Development of Clinical Recommendations for Progressive Return to Activity After Military Mild Traumatic Brain Injury: Guidance for Rehabilitation Providers         | McCulloch et al.                                                                                                        | 2015        | Recommendations not rated     |
| Development of guidelines for severe head injury                                                                                                                     | Wilberger, J. E., Jr.                                                                                                   | 1997        | No Full-Text                  |
| Development of a provincial guideline for the acute assessment and management of adult and pediatric patients with head injuries                                     | Hebb et al.                                                                                                             | 2007        | Recommendations not rated     |
| Diagnosing and Treating Mild Traumatic Brain Injury in Children                                                                                                      | Howard, Patricia Kunz; Shapiro, Susan E.                                                                                | 2011        | Not a CPG                     |
| Diagnosis and management of concussion in sports                                                                                                                     | Kelly et al.                                                                                                            | 1997        | Duplicate                     |
| Diagnosis and management of headaches in young people and adults: NICE guideline                                                                                     | Kennis, K.; Kernick, D.; O'Flynn, N.                                                                                    | 2013        | Not a TBI or Homelessness CPG |
| Diagnosis and treatment of adolescent mild traumatic brain injury: Based on 4th edition guidelines for diagnosis and treatment of traumatic brain injury. [Japanese] | Wada, K.; Toyooka, T.; Otsuka, Y.; Tomiyama, A.; Tomura, S.; Takeuchi, S.; Mishima, Y.                                  | 2021        | Not a CPG                     |

| <b>Title</b>                                                                                                                                                                                                    | <b>Authors</b>                                                                                                                                                                                                                                                                                                                                                  | <b>Year</b> | <b>Reason for exclusion</b> |
|-----------------------------------------------------------------------------------------------------------------------------------------------------------------------------------------------------------------|-----------------------------------------------------------------------------------------------------------------------------------------------------------------------------------------------------------------------------------------------------------------------------------------------------------------------------------------------------------------|-------------|-----------------------------|
| Diagnostic Imaging Pathways - Head Injury (Adult)                                                                                                                                                               | Diagnostic Imaging Pathways (DIP)                                                                                                                                                                                                                                                                                                                               | 2018        | Recommendations not rated   |
| Diagnostic Imaging Pathways - Pediatric, Head Injury                                                                                                                                                            | Diagnostic Imaging Pathways (DIP)                                                                                                                                                                                                                                                                                                                               | 2017        | Recommendations not rated   |
| Diagnostic Imaging Referral Guidelines – Section J: Trauma                                                                                                                                                      | Canadian association of Radiologists                                                                                                                                                                                                                                                                                                                            | 2012        | Not TBI specific            |
| Diagnostic procedures in mild traumatic brain injury: Results of the WHO Collaborating Centre Task Force on mild traumatic brain injury                                                                         | Borg et al.                                                                                                                                                                                                                                                                                                                                                     | 2004        | Recommendations not rated   |
| Early Management of Head Injury in Adults                                                                                                                                                                       | Ministry of Health, Malaysia                                                                                                                                                                                                                                                                                                                                    | 2015        | Recommendations not rated   |
| Early management of isolated severe traumatic brain injury patients in a hospital without neurosurgical capabilities: a consensus and clinical recommendations of the World Society of Emergency Surgery (WSES) | Picetti, Edoardo; Catena, Fausto; Abu-Zidan, Fikri; Ansaloni, Luca; Armonda, Rocco A.; Bala, Miklosh; Balogh, Zsolt J.; Bertuccio, Alessandro; Biffi, Walt L.; Bouzat, Pierre; Buki, Andras; Cerasti, Davide; Chesnut, Randall M.; Citerio, Giuseppe; Coccolini, Federico; Coimbra, Raul; Coniglio, Carlo; Fainardi, Enrico; Gupta, Deepak; Gurney, Jennifer M. | 2023        | Recommendation not rated    |
| EBIC-Guidelines for management of severe head injury in adults                                                                                                                                                  | Maas, A. I. R.; Dearden, M.; Teasdale, G. M.; Braakman, R.; Cohadon, F.; Iannotti, F.; Karimi, A.; Lapierre, F.; Murray, G.; Ohman, J.; Persson, L.; Servadei, F.; Stocchetti, N.; Unterberg, A.                                                                                                                                                                | 1997        | Recommendations not rated   |
| Effect of cognitive rehabilitation on outcomes for persons with traumatic brain injury: A systematic review.                                                                                                    | Carney et al.                                                                                                                                                                                                                                                                                                                                                   | 1999        | Recommendations not rated   |
| Effectively using the psychologic evaluation with children. Some guidelines to assist the pediatrician on making referrals for psychologic evaluation                                                           | Berry, K. K.                                                                                                                                                                                                                                                                                                                                                    | 1973        | Recommendations not rated   |
| End-of-life care for people experiencing homelessness                                                                                                                                                           | National Health Care for the Homeless Council                                                                                                                                                                                                                                                                                                                   | 2018        | Recommendations not rated   |
| Enhancing gender role satisfaction in adult males with traumatic brain injury: A set of guidelines for occupational therapy practice                                                                            | Gutman, S. A.                                                                                                                                                                                                                                                                                                                                                   | 1998        | Recommendations not rated   |
| Epidemiology of collegiate injuries for 15 sports: Summary and recommendations for injury prevention initiatives                                                                                                | Hootman et al.                                                                                                                                                                                                                                                                                                                                                  | 2007        | Not TBI specific            |
| Erratum: American Medical Society for Sports Medicine Position Statement on Concussion in Sport (Clinical Journal of Sport Medicine (2019) 29 (87-100) DOI: 10.1097/JSM.0000000000000720)                       | Anonymous                                                                                                                                                                                                                                                                                                                                                       | 2019        | Not a CPG                   |

| <b>Title</b>                                                                                                                                                                                          | <b>Authors</b>                                                                                                                                                                                   | <b>Year</b> | <b>Reason for exclusion</b> |
|-------------------------------------------------------------------------------------------------------------------------------------------------------------------------------------------------------|--------------------------------------------------------------------------------------------------------------------------------------------------------------------------------------------------|-------------|-----------------------------|
| Erratum: Guidelines for the management of pediatric severe traumatic brain injury, Third edition: Update of the brain trauma foundation guidelines (Pediatr Crit Care Med (2019) 20:Suppl 1 (S1 S82)) | Anonymous                                                                                                                                                                                        | 2019        | Not a CPG                   |
| Erratum: Part 1: Guidelines for the management of penetrating brain injury. Introduction and methodology (Journal of Trauma and Acute Care Surgery (2001) 51:2 (S3-S6))                               | Anonymous                                                                                                                                                                                        | 2017        | Not a CPG                   |
| European guidelines for the treatment of severe head injury in adults. [German]                                                                                                                       | Unterberg, A.                                                                                                                                                                                    | 1997        | No Full-Text                |
| Evaluation and Management of Blunt Cerebrovascular Injury                                                                                                                                             | Witt, C. E.; Burlaw, C. C.                                                                                                                                                                       | 2021        | Not a TBI CPG               |
| Evaluation and management of blunt cerebrovascular injury: A practice management guideline from the Eastern Association for the Surgery of Trauma: Erratum                                            | No author listed                                                                                                                                                                                 | 2020        | Not a CPG                   |
| Evaluation and management of children younger than two years old with apparently minor head trauma: Proposed guidelines                                                                               | Schutzman, S. A.; Barnes, P.; Duhaime, A. C.; Greenes, D.; Homer, C.; Jaffe, D.; Lewis, R. J.; Luerssen, T. G.; Schunk, J.                                                                       | 2001        | Recommendations not rated   |
| Evaluation and Management of Concussion in Young Athletes                                                                                                                                             | Kosoy, Jennifer; Feinstein, Ronald                                                                                                                                                               | 2018        | Not a CPG                   |
| Evaluation and management of mild traumatic brain injury: an Eastern Association for the Surgery of Trauma practice management guideline                                                              | Barbosa, R. R.; Jawa, R.; Watters, J. M.; Knight, J. C.; Kerwin, A. J.; Winston, E. S.; Barraco, R. D.; Tucker, B.; Bardes, J. M.; Rowell, S. E.; Eastern Association for the Surgery of, Trauma | 2012        | Recommendations not rated   |
| Evaluation methods for the benefit assessment of easily accessible, outpatient health centres for vulnerable groups                                                                                   | Winkler, R., Reinsperger, I.                                                                                                                                                                     | 2019        | Recommendation not rated    |
| Evaluation of evidence-based guidelines for fever management in critically ill adult patients with brain injury                                                                                       | Lee, Jung Min; Moon, Ju Ryoung; Kim, Hye Jeong; Kwon, Do Yeon; Shin, Ja Young                                                                                                                    | 2020        | Review of a CPG             |
| EVALUATION OF THE GUIDELINES FOR MTBI AND PERSISTENT SYMPTOMS: 1ST EDITION                                                                                                                            | Marshall, Shawn; Ouchterlony, Donna; Ennis, Naomi; Fischer, Lisa; Vaidyanath, Chantal                                                                                                            | 2016        | Not a CPG                   |
| Evaluation of traumatic brain injury guidelines using AGREE instrument                                                                                                                                | Rusnak, M.; Mauritz, W.; Lecky, F.; Kaniansky, M.; Brazinova, A.                                                                                                                                 | 2008        | Not a CPG                   |
| Evidence- and consensus-based guidelines for the management of communication and swallow disorders following pediatric traumatic brain injury                                                         | Mei C, Anderson V, Waugh MC, Cahill L, Morgan AT; TBI Guideline Development Group                                                                                                                | 2018        | CPG Summary                 |
| Evidence-based cognitive rehabilitation: recommendations for clinical practice                                                                                                                        | Cicerone et al.                                                                                                                                                                                  | 2000        | Not TBI specific            |

| <b>Title</b>                                                                                                                                                                              | <b>Authors</b>                                                                                                                                                                                                                                                                                                                                                                        | <b>Year</b> | <b>Reason for exclusion</b>   |
|-------------------------------------------------------------------------------------------------------------------------------------------------------------------------------------------|---------------------------------------------------------------------------------------------------------------------------------------------------------------------------------------------------------------------------------------------------------------------------------------------------------------------------------------------------------------------------------------|-------------|-------------------------------|
| Evidence-based guidelines for the management of traumatic brain injury                                                                                                                    | Gianino, J. W.; Afuwape, L. O.                                                                                                                                                                                                                                                                                                                                                        | 2012        | CPG Summary                   |
| Evidence-based prehospital management of severe traumatic brain injury: a comparative analysis of current clinical practice guidelines                                                    | Hoogmartens, O.; Heselmans, A.; Van de Velde, S.; Castren, M.; Sjolín, H.; Sabbe, M.; Aertgeerts, B.; Ramaekers, D.                                                                                                                                                                                                                                                                   | 2014        | CPG Summary                   |
| Evidenced-based guidelines for traumatic brain injuries                                                                                                                                   | Marion, D. W.                                                                                                                                                                                                                                                                                                                                                                         | 2006        | CPG Summary                   |
| Evolution of Evidence and Guideline Recommendations for the Medical Management of Severe Traumatic Brain Injury                                                                           | Volovici, V.; Steyerberg, E. W.; Cnossen, M. C.; Haitsma, I. K.; Dirven, C. M. F.; Maas, A. I. R.; Lingsma, H. F.                                                                                                                                                                                                                                                                     | 2019        | Not a CPG                     |
| Exploring the potential of technology- based mental health services for homeless youth: A qualitative study.                                                                              | Adkins et al.                                                                                                                                                                                                                                                                                                                                                                         | 2017        | Not a CPG                     |
| Fluid Resuscitation in Pre-Hospital Trauma Care: a consensus view                                                                                                                         | Anonymous                                                                                                                                                                                                                                                                                                                                                                             | 2001        | Not a TBI or Homelessness CPG |
| Forced displacement: an emerging indirect impact of Covid-19 pandemic in America and the rest of the world. Prospects and Solutions                                                       | Ebeh D , Okpala P , Akinmoladun T                                                                                                                                                                                                                                                                                                                                                     | 2021        | Recommendations not rated     |
| General care in the management of severe traumatic brain injury: Latin American consensus                                                                                                 | Godoy, D. A.; Videtta, W.; Santa Cruz, R.; Silva, X.; Aguilera-Rodriguez, S.; Carreno-Rodriguez, J. N.; Cicciooli, F.; Pinero, G.; Ciro, J. D.; da Re-Gutierrez, S.; Domeniconi, G.; Fischer, D.; Hernandez, O.; Lacerda-Gallardo, A.; Mejia, J.; Panhke, P.; Romero, C.; Lora, F. S.; Soler-Morejon, C.; Sufan, J. L.; Montes, J. M.; Fuenzalida, L. C.; Parahnos, J. L.; Jibaja, M. | 2020        | Paywall                       |
| General recommendations for the care of homeless patients                                                                                                                                 | National Health Care for the Homeless Council                                                                                                                                                                                                                                                                                                                                         | 2010        | Recommendations not rated     |
| Goal attainment scaling in brain injury rehabilitation: Strengths, limitations and recommendations for future applications                                                                | Grant et al.                                                                                                                                                                                                                                                                                                                                                                          | 2014        | Recommendations not rated     |
| Guidance for community-based caregivers in assisting people with moderate to severe traumatic brain injury with transfers and manual handling: evidence and key stakeholder perspectives  | Piccenna, Loretta; Lannin, Natasha A.; Scott, Katherine; Bragge, Peter; Gruen, Russell                                                                                                                                                                                                                                                                                                | 2017        | Not a CPG                     |
| Guidelines and diagnostic-operative modalities for the minor cranial trauma. [Italian]                                                                                                    | Di Giovanni, M.; Bottacchi, E.; Machado, D.; Meloni, T.; Pesenti, M.; Voltolin, G.; Machado, E.; Vigano, M.; Parini, U.; Conca, P. A.                                                                                                                                                                                                                                                 | 2001        | No Full-Text                  |
| Guidelines for the Management of Severe Head Injury, 2nd Edition guidelines from the Guidelines Committee on the Management of Severe Head Injury, the Japan Society of Neurotraumatology | Japan Society of Neurotraumatology (JSN)                                                                                                                                                                                                                                                                                                                                              | 2012        | Recommendations not rated     |
| Guidelines for the treatment of the cranial trauma in adults. The point of view of the neuroradiologist. [Italian]                                                                        | Mavilio, N.; Bruzzzone, E.; Rosso, E.; Testa, E.; Spena, G.; Rosa, M. L.                                                                                                                                                                                                                                                                                                              | 2001        | No Full-Text                  |
| Guide to the proper use of medical imaging examinations - traumatic brain injury                                                                                                          | French Society of Radiology (SFR) and French Society of Nuclear Medicine (SFMN)                                                                                                                                                                                                                                                                                                       | 2013        | Recommendations not rated     |



| <b>Title</b>                                                                                                                                                                      | <b>Authors</b>                                                                                           | <b>Year</b> | <b>Reason for exclusion</b>   |
|-----------------------------------------------------------------------------------------------------------------------------------------------------------------------------------|----------------------------------------------------------------------------------------------------------|-------------|-------------------------------|
| Guideline "medicolegal evaluation after closed head injury" of the German Neurological Society (DGN) and the Working Group on Neurological Medicolegal Evaluation (ANB). [German] | Wallesch, C. W.; Marx, P.; Tegenthoff, M.; Unterberg, A.; Schmidt, R.; Fries, W.                         | 2005        | Paywall                       |
| Guideline of clinical neurorestorative treatment for brain trauma (2022 China version)                                                                                            | Yang, X.; Pu, J.; Li, Y.; Cai, J.; Chen, L.; Feng, S.; He, J.; Wang, Y.; Zhang, S.; Cheng, S.; Huang, H. | 2022        | Recommendation not rated      |
| Guidelines for assessment and management of sport-related concussion                                                                                                              | No authors listed                                                                                        | 2000        | Recommendations not rated     |
| Guidelines for assessment and management of sport-related concussion. Canadian Academy of Sport Medicine Concussion Committee                                                     | Anonymous                                                                                                | 2000        | Recommendations not rated     |
| Guidelines for acute medical management of severe traumatic brain injury in infants and children                                                                                  | Khilnani, Praveen                                                                                        | 2013        | CPG Summary                   |
| Guidelines for Bystander First Aid 2016                                                                                                                                           | Jen Heng, Pek; Pek, Jen Heng                                                                             | 2017        | Not a TBI or Homelessness CPG |
| Guidelines for cerebral perfusion pressure                                                                                                                                        | Anonymous                                                                                                | 1996        | Duplicate                     |
| Guidelines for cerebral perfusion pressure. Brain Trauma Foundation                                                                                                               | Anonymous                                                                                                | 1996        | Older version of CPG          |
| Guidelines for diagnosing and managing paediatric concussion: Ontario Neurotrauma Foundation guideline                                                                            | Hingley, S.; Ross, J.                                                                                    | 2016        | CPG Summary                   |
| Guidelines for Diagnosing and Managing Pediatric Concussion                                                                                                                       | Ontario Neurotrauma Foundation                                                                           | 2014        | Older version of CPG          |
| Guidelines for evaluation and education of adult patients with mild traumatic brain injuries in an acute care hospital setting                                                    | Lawler, K. A.; Terregino, C. A.                                                                          | 1996        | Recommendations not rated     |
| Guidelines for head injury: their use and limitations                                                                                                                             | Maas, A. I.                                                                                              | 2002        | CPG Summary                   |
| Guidelines for imaging children with head injuries in A&E departments                                                                                                             | McHugh, K.; Moore, F.                                                                                    | 1997        | Not a CPG                     |
| Guidelines for initial management after head injury in adults. Suggestions from a group of neurosurgeons                                                                          | Anonymous                                                                                                | 1984        | Recommendations not rated     |
| Guidelines for initial management after head injury in adults. Suggestions from a group of neurosurgeons                                                                          | Briggs, M.; Clarge, P.; Crockard, A.                                                                     | 1984        | Recommendations not rated     |
| Guidelines for managing minor head injuries                                                                                                                                       | Tabish, A.; Lone, N. A.; Wani, M. A.; Salam, A.                                                          | 2009        | No Full-Text                  |
| Guidelines for mild head injuries in children                                                                                                                                     | Garcia-Rodriguez, J. A.; Thomas, R. E.                                                                   | 2014        | Not a CPG                     |

| Title                                                                                                                                                                                                                                                           | Authors                                                                                                                                                              | Year | Reason for exclusion          |
|-----------------------------------------------------------------------------------------------------------------------------------------------------------------------------------------------------------------------------------------------------------------|----------------------------------------------------------------------------------------------------------------------------------------------------------------------|------|-------------------------------|
| Guidelines for minor head injured patients' management in adult age. The Study Group on Head Injury of the Italian Society for Neurosurgery                                                                                                                     | Anonymous                                                                                                                                                            | 1996 | No Full-Text                  |
| Guidelines for prehospital care of patients with severe head injury. [German]                                                                                                                                                                                   | Kwasny, O.; Kemetzhofer, P.; Fialka, C.; Nau, T.                                                                                                                     | 1999 | No Full-Text                  |
| Guidelines for prehospital management of traumatic brain injury                                                                                                                                                                                                 | Anonymous                                                                                                                                                            | 2002 | Older version of CPG          |
| Guidelines for prehospital management of traumatic brain injury                                                                                                                                                                                                 | Gabriel, E. J.; Ghajar, J.; Jagoda, A.; Pons, P. T.; Scalea, T.; Walters, B. C.; Brain Trauma, Foundation                                                            | 2002 | Duplicate                     |
| Guidelines for primary care of patients with head injury. [German]                                                                                                                                                                                              | Jantzen, J. P.; Piek, J.                                                                                                                                             | 1997 | No Full-Text                  |
| Guidelines for primary care of patients with skull brain injuries. [German]                                                                                                                                                                                     | Jantzen, J. P.; Piek, J.                                                                                                                                             | 1997 | No Full-Text                  |
| Guidelines for primary treatment of patients with head injury. [German]                                                                                                                                                                                         | Baum; Hennes; Jantzen; Karimi; Kiening; Meixensberger; Moskopp; Piek; Piepenbrock; Poll; Rickels; Seffrin; Unterberg; Wobker                                         | 1997 | No Full-Text                  |
| Guidelines for resuscitation and transfer of patients with serious head injury                                                                                                                                                                                  | Gentleman, D.; Dearden, M.; Midgley, S.; Maclean, D.                                                                                                                 | 1993 | Recommendations not rated     |
| Guidelines for Return to Contact Sports After a Cerebral Concussion                                                                                                                                                                                             | Cantu, R. C.                                                                                                                                                         | 1986 | Recommendations not rated     |
| Guidelines for safe transfer of the brain-injured patient: trauma and stroke, 2019: Guidelines from the Association of Anaesthetists and the Neuro Anaesthesia and Critical Care Society                                                                        | Nathanson, M. H.; Andrzejowski, J.; Dinsmore, J.; Eynon, C. A.; Ferguson, K.; Hooper, T.; Kashyap, A.; Kendall, J.; McCormack, V.; Shinde, S.; Smith, A.; Thomas, E. | 2020 | Not a TBI or Homelessness CPG |
| Guidelines for specialized nutritional and metabolic support in the critically-ill patient. Update. Consensus of the Spanish Society of Intensive Care Medicine and Coronary Units-Spanish Society of Parenteral and Enteral Nutrition (SEMICYUC-SENPE): Patien | Blesa Malpica, A. L.; Garcia de Lorenzo y Mateos, A.; Robles Gonzalez, A.                                                                                            | 2011 | Not a TBI CPG                 |
| Guidelines for the acute medical management of severe traumatic brain injury in infants, children, and adolescents                                                                                                                                              | No authors listed                                                                                                                                                    | 2003 | Duplicate                     |
| Guidelines for the acute medical management of severe traumatic brain injury in infants, children, and adolescents                                                                                                                                              | No authors listed                                                                                                                                                    | 2003 | Duplicate                     |
| Guidelines for the acute medical management of severe traumatic brain injury in infants, children, and adolescents                                                                                                                                              | Carney, N. A.; Chesnut, R.; Kochanek, P. M.                                                                                                                          | 2003 | Not a CPG                     |

| Title                                                                                                                                                                                                                                          | Authors                                                                                                                                                                                                                                                                                                                                                                                                                                                                                     | Year | Reason for exclusion |
|------------------------------------------------------------------------------------------------------------------------------------------------------------------------------------------------------------------------------------------------|---------------------------------------------------------------------------------------------------------------------------------------------------------------------------------------------------------------------------------------------------------------------------------------------------------------------------------------------------------------------------------------------------------------------------------------------------------------------------------------------|------|----------------------|
| Guidelines for the acute medical management of severe traumatic brain injury in infants, children, and adolescents. Chapter 1: Introduction                                                                                                    | Adelson, P. D.; Bratton, S. L.; Carney, N. A.; Chesnut, R. M.; du Coudray, H. E.; Goldstein, B.; Kochanek, P. M.; Miller, H. C.; Partington, M. D.; Selden, N. R.; Warden, C. R.; Wright, D. W.; American Association for Surgery of, Trauma; Child Neurology, Society; International Society for Pediatric, Neurosurgery; International Trauma, Anesthesia; Critical Care, Society; Society of Critical Care, Medicine; World Federation of Pediatric, Intensive; Critical Care, Societies | 2003 | Older version of CPG |
| Guidelines for the acute medical management of severe traumatic brain injury in infants, children, and adolescents. Chapter 10. The role of cerebrospinal fluid drainage in the treatment of severe pediatric traumatic brain injury           | Adelson, P. D.; Bratton, S. L.; Carney, N. A.; Chesnut, R. M.; du Coudray, H. E.; Goldstein, B.; Kochanek, P. M.; Miller, H. C.; Partington, M. D.; Selden, N. R.; Warden, C. R.; Wright, D. W.; American Association for Surgery of, Trauma; Child Neurology, Society; International Society for Pediatric, Neurosurgery; International Trauma, Anesthesia; Critical Care, Society; Society of Critical Care, Medicine; World Federation of Pediatric, Intensive; Critical Care, Societies | 2003 | Older version of CPG |
| Guidelines for the acute medical management of severe traumatic brain injury in infants, children, and adolescents. Chapter 11. Use of hyperosmolar therapy in the management of severe pediatric traumatic brain injury                       | Adelson, P. D.; Bratton, S. L.; Carney, N. A.; Chesnut, R. M.; du Coudray, H. E.; Goldstein, B.; Kochanek, P. M.; Miller, H. C.; Partington, M. D.; Selden, N. R.; Warden, C. R.; Wright, D. W.; American Association for Surgery of, Trauma; Child Neurology, Society; International Society for Pediatric, Neurosurgery; International Trauma, Anesthesia; Critical Care, Society; Society of Critical Care, Medicine; World Federation of Pediatric, Intensive; Critical Care, Societies | 2003 | Older version of CPG |
| Guidelines for the acute medical management of severe traumatic brain injury in infants, children, and adolescents. Chapter 12. Use of hyperventilation in the acute management of severe pediatric traumatic brain injury                     | Adelson, P. D.; Bratton, S. L.; Carney, N. A.; Chesnut, R. M.; du Coudray, H. E.; Goldstein, B.; Kochanek, P. M.; Miller, H. C.; Partington, M. D.; Selden, N. R.; Warden, C. R.; Wright, D. W.; American Association for Surgery of, Trauma; Child Neurology, Society; International Society for Pediatric, Neurosurgery; International Trauma, Anesthesia; Critical Care, Society; Society of Critical Care, Medicine; World Federation of Pediatric, Intensive; Critical Care, Societies | 2003 | Older version of CPG |
| Guidelines for the acute medical management of severe traumatic brain injury in infants, children, and adolescents. Chapter 13. The use of barbiturates in the control of intracranial hypertension in severe pediatric traumatic brain injury | Adelson, P. D.; Bratton, S. L.; Carney, N. A.; Chesnut, R. M.; du Coudray, H. E.; Goldstein, B.; Kochanek, P. M.; Miller, H. C.; Partington, M. D.; Selden, N. R.; Warden, C. R.; Wright, D. W.; American Association for Surgery of, Trauma; Child Neurology, Society; International Society for Pediatric, Neurosurgery; International Trauma, Anesthesia; Critical Care, Society; Society of Critical Care, Medicine; World Federation of Pediatric, Intensive; Critical Care, Societies | 2003 | Older version of CPG |

| Title                                                                                                                                                                                                                                           | Authors                                                                                                                                                                                                                                                                                                                                                                                                                                                                                     | Year | Reason for exclusion |
|-------------------------------------------------------------------------------------------------------------------------------------------------------------------------------------------------------------------------------------------------|---------------------------------------------------------------------------------------------------------------------------------------------------------------------------------------------------------------------------------------------------------------------------------------------------------------------------------------------------------------------------------------------------------------------------------------------------------------------------------------------|------|----------------------|
| Guidelines for the acute medical management of severe traumatic brain injury in infants, children, and adolescents. Chapter 14. The role of temperature control following severe pediatric traumatic brain injury                               | Adelson, P. D.; Bratton, S. L.; Carney, N. A.; Chesnut, R. M.; du Coudray, H. E.; Goldstein, B.; Kochanek, P. M.; Miller, H. C.; Partington, M. D.; Selden, N. R.; Warden, C. R.; Wright, D. W.; American Association for Surgery of, Trauma; Child Neurology, Society; International Society for Pediatric, Neurosurgery; International Trauma, Anesthesia; Critical Care, Society; Society of Critical Care, Medicine; World Federation of Pediatric, Intensive; Critical Care, Societies | 2003 | Older version of CPG |
| Guidelines for the acute medical management of severe traumatic brain injury in infants, children, and adolescents. Chapter 15. Surgical treatment of pediatric intracranial hypertension                                                       | Adelson, P. D.; Bratton, S. L.; Carney, N. A.; Chesnut, R. M.; du Coudray, H. E.; Goldstein, B.; Kochanek, P. M.; Miller, H. C.; Partington, M. D.; Selden, N. R.; Warden, C. R.; Wright, D. W.; American Association for Surgery of, Trauma; Child Neurology, Society; International Society for Pediatric, Neurosurgery; International Trauma, Anesthesia; Critical Care, Society; Society of Critical Care, Medicine; World Federation of Pediatric, Intensive; Critical Care, Societies | 2003 | Older version of CPG |
| Guidelines for the acute medical management of severe traumatic brain injury in infants, children, and adolescents. Chapter 16. The use of corticosteroids in the treatment of severe pediatric traumatic brain injury                          | Adelson, P. D.; Bratton, S. L.; Carney, N. A.; Chesnut, R. M.; du Coudray, H. E.; Goldstein, B.; Kochanek, P. M.; Miller, H. C.; Partington, M. D.; Selden, N. R.; Warden, C. R.; Wright, D. W.; American Association for Surgery of, Trauma; Child Neurology, Society; International Society for Pediatric, Neurosurgery; International Trauma, Anesthesia; Critical Care, Society; Society of Critical Care, Medicine; World Federation of Pediatric, Intensive; Critical Care, Societies | 2003 | Older version of CPG |
| Guidelines for the acute medical management of severe traumatic brain injury in infants, children, and adolescents. Chapter 17. Critical pathway for the treatment of established intracranial hypertension in pediatric traumatic brain injury | Adelson, P. D.; Bratton, S. L.; Carney, N. A.; Chesnut, R. M.; du Coudray, H. E.; Goldstein, B.; Kochanek, P. M.; Miller, H. C.; Partington, M. D.; Selden, N. R.; Warden, C. W.; Wright, D. W.; American Association for Surgery of, Trauma; Child Neurology, Society; International Society for Pediatric, Neurosurgery; International Trauma, Anesthesia; Critical Care, Society; Society of Critical Care, Medicine; World Federation of Pediatric, Intensive; Critical Care, Societies | 2003 | Older version of CPG |
| Guidelines for the acute medical management of severe traumatic brain injury in infants, children, and adolescents. Chapter 18. Nutritional support                                                                                             | Adelson, P. D.; Bratton, S. L.; Carney, N. A.; Chesnut, R. M.; du Coudray, H. E.; Goldstein, B.; Kochanek, P. M.; Miller, H. C.; Partington, M. D.; Selden, N. R.; Warden, C. R.; Wright, D. W.; American Association for Surgery of, Trauma; Child Neurology, Society; International Society for Pediatric, Neurosurgery; International Trauma, Anesthesia; Critical Care, Society; Society of Critical Care, Medicine; World Federation of Pediatric, Intensive; Critical Care, Societies | 2003 | Older version of CPG |

| Title                                                                                                                                                                                                                                                            | Authors                                                                                                                                                                                                                                                                                                                                                                                                                                                                                     | Year | Reason for exclusion |
|------------------------------------------------------------------------------------------------------------------------------------------------------------------------------------------------------------------------------------------------------------------|---------------------------------------------------------------------------------------------------------------------------------------------------------------------------------------------------------------------------------------------------------------------------------------------------------------------------------------------------------------------------------------------------------------------------------------------------------------------------------------------|------|----------------------|
| Guidelines for the acute medical management of severe traumatic brain injury in infants, children, and adolescents. Chapter 19. The role of anti-seizure prophylaxis following severe pediatric traumatic brain injury                                           | Adelson, P. D.; Bratton, S. L.; Carney, N. A.; Chesnut, R. M.; du Coudray, H. E.; Goldstein, B.; Kochanek, P. M.; Miller, H. C.; Partington, M. P.; Selden, N. R.; Warden, C. R.; Wright, D. W.; American Association for Surgery of, Trauma; Child Neurology, Society; International Society for Pediatric, Neurosurgery; International Trauma, Anesthesia; Critical Care, Society; Society of Critical Care, Medicine; World Federation of Pediatric, Intensive; Critical Care, Societies | 2003 | Older version of CPG |
| Guidelines for the acute medical management of severe traumatic brain injury in infants, children, and adolescents. Chapter 2: Trauma systems, pediatric trauma centers, and the neurosurgeon                                                                    | Adelson, P. D.; Bratton, S. L.; Carney, N. A.; Chesnut, R. M.; du Coudray, H. E.; Goldstein, B.; Kochanek, P. M.; Miller, H. C.; Partington, M. D.; Selden, N. R.; Warden, C. R.; Wright, D. W.; American Association for Surgery of, Trauma; Child Neurology, Society; International Society for Pediatric, Neurosurgery; International Trauma, Anesthesia; Critical Care, Society; Society of Critical Care, Medicine; World Federation of Pediatric, Intensive; Critical Care, Societies | 2003 | Older version of CPG |
| Guidelines for the acute medical management of severe traumatic brain injury in infants, children, and adolescents. Chapter 3. Prehospital airway management                                                                                                     | Adelson, P. D.; Bratton, S. L.; Carney, N. A.; Chesnut, R. M.; du Coudray, H. E.; Goldstein, B.; Kochanek, P. K.; Miller, H. C.; Partington, M. D.; Selden, N. R.; Warden, C. R.; Wright, D. W.; American Association for Surgery of, Trauma; Child Neurology, Society; International Society for Pediatric, Neurosurgery; International Trauma, Anesthesia; Critical Care, Society; Society of Critical Care, Medicine; World Federation of Pediatric, Intensive; Critical Care, Societies | 2003 | Older version of CPG |
| Guidelines for the acute medical management of severe traumatic brain injury in infants, children, and adolescents. Chapter 4. Resuscitation of blood pressure and oxygenation and prehospital brain-specific therapies for the severe pediatric traumatic brain | Adelson, P. D.; Bratton, S. L.; Carney, N. A.; Chesnut, R. M.; du Coudray, H. E.; Goldstein, B.; Kochanek, P. M.; Miller, H. C.; Partington, M. D.; Selden, N. R.; American Association for Surgery of, Trauma; Child Neurology, Society; International Society for Pediatric, Neurosurgery; International Trauma, Anesthesia; Critical Care, Society; Society of Critical Care, Medicine; World Federation of Pediatric, Intensive; Critical Care, Societies                               | 2003 | Older version of CPG |
| Guidelines for the acute medical management of severe traumatic brain injury in infants, children, and adolescents. Chapter 5. Indications for intracranial pressure monitoring in pediatric patients with severe traumatic brain injury                         | Adelson, P. D.; Bratton, S. L.; Carney, N. A.; Chesnut, R. M.; du Coudray, H. E.; Goldstein, B.; Kochanek, P. M.; Miller, H. C.; Partington, M. D.; Selden, N. R.; Warden, C. R.; Wright, D. W.; American Association for Surgery of, Trauma; Child Neurology, Society; International Society for Pediatric, Neurosurgery; International Trauma, Anesthesia; Critical Care, Society; Society of Critical Care, Medicine; World Federation of Pediatric, Intensive; Critical Care, Societies | 2003 | Older version of CPG |

| Title                                                                                                                                                                                                                                 | Authors                                                                                                                                                                                                                                                                                                                                                                                                                                                                                         | Year | Reason for exclusion |
|---------------------------------------------------------------------------------------------------------------------------------------------------------------------------------------------------------------------------------------|-------------------------------------------------------------------------------------------------------------------------------------------------------------------------------------------------------------------------------------------------------------------------------------------------------------------------------------------------------------------------------------------------------------------------------------------------------------------------------------------------|------|----------------------|
| Guidelines for the acute medical management of severe traumatic brain injury in infants, children, and adolescents. Chapter 6. Threshold for treatment of intracranial hypertension                                                   | Adelson, P. D.; Bratton, S. L.; Carney, N. A.; Chesnut, R. M.; du Coudray, H. E.; Goldstein, B.; Kochanek, P. M.; Miller, H. C.; Partington, M. D.; Selden, N. R.; Warden, C. R.; Wright, D. W.; American Association for Surgery of, Trauma; Child Neurology, Society; International Society for Pediatric, Neurosurgery; International Trauma, Anesthesia; Critical Care, Society; Society of Critical Care, Medicine; World Federation of Pediatric, Intensive; Critical Care, Societies     | 2003 | Older version of CPG |
| Guidelines for the acute medical management of severe traumatic brain injury in infants, children, and adolescents. Chapter 7. Intracranial pressure monitoring technology                                                            | Adelson, P. D.; Bratton, S. L.; Carney, N. A.; Chesnut, R. M.; du Coudray, H. E.; Goldstein, B.; Kochanek, P. M.; Miller, H. C.; Partington, M. D.; Selden, N. R.; Warden, C. R.; Wright, D. W.; American Association for Surgery of, Trauma; Child Neurology, Society; International Society for Pediatric, Neurosurgery; International Trauma, Anesthesia; Critical Care, Society; Society of Critical Care, Medicine; World Federation of Pediatric, Intensive; Critical Care, Societies     | 2003 | Older version of CPG |
| Guidelines for the acute medical management of severe traumatic brain injury in infants, children, and adolescents. Chapter 8. Cerebral perfusion pressure                                                                            | Adelson, P. D.; Bratton, S. L.; Carney, N. A.; Chesnut, R. M.; du Coudray, H. E.; Goldstein, B.; Kochanek, P. M.; Miller, H. C.; Partington, M. D.; Selden, N. R.; Warden, C. R.; Wright, D. W.; American Association for Surgery of, Trauma; Child Neurology, Society; International Society for Pediatric, Neurosurgery; International Trauma, Anesthesia; Critical Care, Society; Society of Critical Care, Medicine; World Federation of Pediatric, Intensive; Critical Care, Societies     | 2003 | Older version of CPG |
| Guidelines for the acute medical management of severe traumatic brain injury in infants, children, and adolescents. Chapter 9. Use of sedation and neuromuscular blockade in the treatment of severe pediatric traumatic brain injury | Adelson, P. D.; Bratton, S. L.; Carney, N. A.; Chesnut, R. M.; du Coudray, H. E.; Goldstein, B.; Kochanek, P. M.; Miller, H. C.; Partington, M. D.; Selden, N. R.; Warden, C. R.; Wright, D. W.; American Association for the Surgery of, Trauma; Child Neurology, Society; International Society for Pediatric, Neurosurgery; International Trauma, Anesthesia; Critical Care, Society; Society of Critical Care, Medicine; World Federation of Pediatric, Intensive; Critical Care, Societies | 2003 | Older version of CPG |

| Title                                                                                                                                                                                     | Authors                                                                                                                                                                                                                                                                                                                                                                                                                                                                                                                                                                                                                                                                                                                                                                                                         | Year | Reason for exclusion |
|-------------------------------------------------------------------------------------------------------------------------------------------------------------------------------------------|-----------------------------------------------------------------------------------------------------------------------------------------------------------------------------------------------------------------------------------------------------------------------------------------------------------------------------------------------------------------------------------------------------------------------------------------------------------------------------------------------------------------------------------------------------------------------------------------------------------------------------------------------------------------------------------------------------------------------------------------------------------------------------------------------------------------|------|----------------------|
| Guidelines for the acute medical management of severe traumatic brain injury in infants, children, and adolescents--second edition                                                        | Kochanek, P. M.; Carney, N.; Adelson, P. D.; Ashwal, S.; Bell, M. J.; Bratton, S.; Carson, S.; Chesnut, R. M.; Ghajar, J.; Goldstein, B.; Grant, G. A.; Kisson, N.; Peterson, K.; Selden, N. R.; Tasker, R. C.; Tong, K. A.; Vavilala, M. S.; Wainwright, M. S.; Warden, C. R.; American Academy of Pediatrics-Section on Neurological, Surgery; American Association of Neurological Surgeons/Congress of Neurological, Surgeons; Child Neurology, Society; European Society of, Pediatric; Neonatal Intensive, Care; Neurocritical Care, Society; Pediatric Neurocritical Care Research, Group; Society of Critical Care, Medicine; Paediatric Intensive Care Society, U. K.; Society for Neuroscience in, Anesthesiology; Critical, Care; World Federation of Pediatric, Intensive; Critical Care, Societies | 2012 | Not a CPG            |
| Guidelines for the care of brain and spinal cord injuries                                                                                                                                 | Anonymous                                                                                                                                                                                                                                                                                                                                                                                                                                                                                                                                                                                                                                                                                                                                                                                                       | 1945 | No Full-Text         |
| Guidelines for the management of head injuries in remote and rural Alaska                                                                                                                 | Sacco, F.; Zafren, K.; Brown, K.; Cohen, T.; Coopes, B. J.; Godersky, J.; Hudson, D.; Hyams, S.; Ingraham, D.; Levy, M.; Ma, W.; Martinez, P.; Montano, W.; Mithun, J.; O'Malley, J.; O'Neill, K.; Powers, D.; Smith, L.; Alaska Trauma Systems Review Committee/Head Trauma Task, Force                                                                                                                                                                                                                                                                                                                                                                                                                                                                                                                        | 2004 | No Full-Text         |
| Guidelines for the Management of Pediatric Severe Traumatic Brain Injury, Third Edition: Update of the Brain Trauma Foundation Guidelines: Erratum                                        |                                                                                                                                                                                                                                                                                                                                                                                                                                                                                                                                                                                                                                                                                                                                                                                                                 | 2019 | Not a CPG            |
| Guidelines for the Management of Severe Head Injury, 2nd Edition guidelines from the Guidelines Committee on the Management of Severe Head Injury, the Japan Society of Neurotraumatology | Shigemori, M.; Abe, T.; Aruga, T.; Ogawa, T.; Okudera, H.; Ono, J.; Onuma, T.; Katayama, Y.; Kawai, N.; Kawamata, T.; Kohmura, E.; Sakaki, T.; Sakamoto, T.; Sasaki, T.; Sato, A.; Shiogai, T.; Shima, K.; Sugiura, K.; Takasato, Y.; Tokutomi, T.; Tomita, H.; Toyoda, I.; Nagao, S.; Nakamura, H.; Park, Y. S.; Matsumae, M.; Miki, T.; Miyake, Y.; Murai, H.; Murakami, S.; Yamaura, A.; Yamaki, T.; Yamada, K.; Yoshimine, T.; Guidelines Committee on the Management of Severe Head Injury, Japan Society of Neurotraumatology                                                                                                                                                                                                                                                                             | 2012 | Adaptation of a CPG  |
| Guidelines for the management of severe head injury. Brain Trauma Foundation                                                                                                              | Bullock, R.; Chesnut, R. M.; Clifton, G.; Ghajar, J.; Marion, D. W.; Narayan, R. K.; Newell, D. W.; Pitts, L. H.; Rosner, M. J.; Wilberger, J. W.                                                                                                                                                                                                                                                                                                                                                                                                                                                                                                                                                                                                                                                               | 1996 | Older version of CPG |
| Guidelines for the management of severe head injury. Brain Trauma Foundation, American Association of Neurological Surgeons, Joint Section on Neurotrauma and Critical Care               | Anonymous                                                                                                                                                                                                                                                                                                                                                                                                                                                                                                                                                                                                                                                                                                                                                                                                       | 1996 | Older version of CPG |

| Title                                                                                             | Authors                                                                                                                                                                                                                                                                                                                                                                                                                                 | Year | Reason for exclusion    |
|---------------------------------------------------------------------------------------------------|-----------------------------------------------------------------------------------------------------------------------------------------------------------------------------------------------------------------------------------------------------------------------------------------------------------------------------------------------------------------------------------------------------------------------------------------|------|-------------------------|
| Guidelines for the management of severe head injury. Introduction                                 | Anonymous                                                                                                                                                                                                                                                                                                                                                                                                                               | 1996 | Older version of CPG    |
| Guidelines for the management of severe head injury: clinical application and changes in practice | Littlejohns, L. R.; Bader, M. K.                                                                                                                                                                                                                                                                                                                                                                                                        | 2001 | No Full-Text            |
| Guidelines for the management of severe traumatic brain injury                                    | Brain Trauma, Foundation; American Association of Neurological, Surgeons; Congress of Neurological, Surgeons                                                                                                                                                                                                                                                                                                                            | 2007 | Older version of CPG    |
| Guidelines for the Management of Severe Traumatic Brain Injury, Fourth Edition                    | Carney, N.; Totten, A. M.; O'Reilly, C.; Ullman, J. S.; Hawryluk, G. W. J.; Bell, M. J.; Bratton, S. L.; Chesnut, R.; Harris, O. A.; Kissoon, N.; Rubiano, A. M.; Shutter, L.; Tasker, R. C.; Vavilala, M. S.; Wilberger, J.; Wright, D. W.; Ghajar, J.                                                                                                                                                                                 | 2016 | Duplicate; No Full-Text |
| Guidelines for the management of severe traumatic brain injury, fourth edition. [Czech]           | Cerny, V.                                                                                                                                                                                                                                                                                                                                                                                                                               | 2016 | CPG Summary             |
| Guidelines for the management of severe traumatic brain injury. I. Blood pressure and oxygenation | Brain Trauma, Foundation; American Association of Neurological, Surgeons; Congress of Neurological, Surgeons; Joint Section on, Neurotrauma; Critical Care, Aans Cns; Bratton, S. L.; Chestnut, R. M.; Ghajar, J.; McConnell Hammond, F. F.; Harris, O. A.; Hartl, R.; Manley, G. T.; Nemecek, A.; Newell, D. W.; Rosenthal, G.; Schouten, J.; Shutter, L.; Timmons, S. D.; Ullman, J. S.; Videtta, W.; Wilberger, J. E.; Wright, D. W. | 2007 | Older version of CPG    |
| Guidelines for the management of severe traumatic brain injury. II. Hyperosmolar therapy          | Brain Trauma, Foundation; American Association of Neurological, Surgeons; Congress of Neurological, Surgeons; Joint Section on, Neurotrauma; Critical Care, Aans Cns; Bratton, S. L.; Chestnut, R. M.; Ghajar, J.; McConnell Hammond, F. F.; Harris, O. A.; Hartl, R.; Manley, G. T.; Nemecek, A.; Newell, D. W.; Rosenthal, G.; Schouten, J.; Shutter, L.; Timmons, S. D.; Ullman, J. S.; Videtta, W.; Wilberger, J. E.; Wright, D. W. | 2007 | Older version of CPG    |
| Guidelines for the management of severe traumatic brain injury. III. Prophylactic hypothermia     | Brain Trauma, Foundation; American Association of Neurological, Surgeons; Congress of Neurological, Surgeons; Joint Section on, Neurotrauma; Critical Care, Aans Cns; Bratton, S. L.; Chestnut, R. M.; Ghajar, J.; McConnell Hammond, F. F.; Harris, O. A.; Hartl, R.; Manley, G. T.; Nemecek, A.; Newell, D. W.; Rosenthal, G.; Schouten, J.; Shutter, L.; Timmons, S. D.; Ullman, J. S.; Videtta, W.; Wilberger, J. E.; Wright, D. W. | 2007 | Older version of CPG    |
| Guidelines for the management of severe traumatic brain injury. Introduction                      | Brain Trauma, Foundation; American Association of Neurological, Surgeons; Congress of Neurological, Surgeons; Joint Section on, Neurotrauma; Critical Care, Aans Cns; Carney, N. A.; Ghajar, J.                                                                                                                                                                                                                                         | 2007 | Older version of CPG    |



| Title                                                                                                                | Authors                                                                                                                                                                                                                                                                                                                                                                                                                                 | Year | Reason for exclusion |
|----------------------------------------------------------------------------------------------------------------------|-----------------------------------------------------------------------------------------------------------------------------------------------------------------------------------------------------------------------------------------------------------------------------------------------------------------------------------------------------------------------------------------------------------------------------------------|------|----------------------|
| Guidelines for the management of severe traumatic brain injury. IV. Infection prophylaxis                            | Brain Trauma, Foundation; American Association of Neurological, Surgeons; Congress of Neurological, Surgeons; Joint Section on, Neurotrauma; Critical Care, Aans Cns; Bratton, S. L.; Chestnut, R. M.; Ghajar, J.; McConnell Hammond, F. F.; Harris, O. A.; Hartl, R.; Manley, G. T.; Nemecek, A.; Newell, D. W.; Rosenthal, G.; Schouten, J.; Shutter, L.; Timmons, S. D.; Ullman, J. S.; Videtta, W.; Wilberger, J. E.; Wright, D. W. | 2007 | Older version of CPG |
| Guidelines for the management of severe traumatic brain injury. IX. Cerebral perfusion thresholds                    | Brain Trauma, Foundation; American Association of Neurological, Surgeons; Congress of Neurological, Surgeons; Joint Section on, Neurotrauma; Critical Care, Aans Cns; Bratton, S. L.; Chestnut, R. M.; Ghajar, J.; McConnell Hammond, F. F.; Harris, O. A.; Hartl, R.; Manley, G. T.; Nemecek, A.; Newell, D. W.; Rosenthal, G.; Schouten, J.; Shutter, L.; Timmons, S. D.; Ullman, J. S.; Videtta, W.; Wilberger, J. E.; Wright, D. W. | 2007 | Older version of CPG |
| Guidelines for the management of severe traumatic brain injury. Methods                                              | Brain Trauma, Foundation; American Association of Neurological, Surgeons; Congress of Neurological, Surgeons; Joint Section on, Neurotrauma; Critical Care, Aans Cns; Carney, N. A.                                                                                                                                                                                                                                                     | 2007 | Older version of CPG |
| Guidelines for the management of severe traumatic brain injury. V. Deep vein thrombosis prophylaxis                  | Brain Trauma, Foundation; American Association of Neurological, Surgeons; Congress of Neurological, Surgeons; Joint Section on, Neurotrauma; Critical Care, Aans Cns; Bratton, S. L.; Chestnut, R. M.; Ghajar, J.; McConnell Hammond, F. F.; Harris, O. A.; Hartl, R.; Manley, G. T.; Nemecek, A.; Newell, D. W.; Rosenthal, G.; Schouten, J.; Shutter, L.; Timmons, S. D.; Ullman, J. S.; Videtta, W.; Wilberger, J. E.; Wright, D. W. | 2007 | Older version of CPG |
| Guidelines for the management of severe traumatic brain injury. VI. Indications for intracranial pressure monitoring | Brain Trauma, Foundation; American Association of Neurological, Surgeons; Congress of Neurological, Surgeons; Joint Section on, Neurotrauma; Critical Care, Aans Cns; Bratton, S. L.; Chestnut, R. M.; Ghajar, J.; McConnell Hammond, F. F.; Harris, O. A.; Hartl, R.; Manley, G. T.; Nemecek, A.; Newell, D. W.; Rosenthal, G.; Schouten, J.; Shutter, L.; Timmons, S. D.; Ullman, J. S.; Videtta, W.; Wilberger, J. E.; Wright, D. W. | 2007 | Older version of CPG |
| Guidelines for the management of severe traumatic brain injury. VII. Intracranial pressure monitoring technology     | Brain Trauma, Foundation; American Association of Neurological, Surgeons; Congress of Neurological, Surgeons; Joint Section on, Neurotrauma; Critical Care, Aans Cns; Bratton, S. L.; Chestnut, R. M.; Ghajar, J.; McConnell Hammond, F. F.; Harris, O. A.; Hartl, R.; Manley, G. T.; Nemecek, A.; Newell, D. W.; Rosenthal, G.; Schouten, J.; Shutter, L.; Timmons, S. D.; Ullman, J. S.; Videtta, W.; Wilberger, J. E.; Wright, D. W. | 2007 | Older version of CPG |

| Title                                                                                                      | Authors                                                                                                                                                                                                                                                                                                                                                                                                                                 | Year | Reason for exclusion |
|------------------------------------------------------------------------------------------------------------|-----------------------------------------------------------------------------------------------------------------------------------------------------------------------------------------------------------------------------------------------------------------------------------------------------------------------------------------------------------------------------------------------------------------------------------------|------|----------------------|
| Guidelines for the management of severe traumatic brain injury. VIII. Intracranial pressure thresholds     | Brain Trauma, Foundation; American Association of Neurological, Surgeons; Congress of Neurological, Surgeons; Joint Section on, Neurotrauma; Critical Care, Aans Cns; Bratton, S. L.; Chestnut, R. M.; Ghajar, J.; McConnell Hammond, F. F.; Harris, O. A.; Hartl, R.; Manley, G. T.; Nemecek, A.; Newell, D. W.; Rosenthal, G.; Schouten, J.; Shutter, L.; Timmons, S. D.; Ullman, J. S.; Videtta, W.; Wilberger, J. E.; Wright, D. W. | 2007 | Older version of CPG |
| Guidelines for the management of severe traumatic brain injury. X. Brain oxygen monitoring and thresholds  | Brain Trauma, Foundation; American Association of Neurological, Surgeons; Congress of Neurological, Surgeons; Joint Section on, Neurotrauma; Critical Care, Aans Cns; Bratton, S. L.; Chestnut, R. M.; Ghajar, J.; McConnell Hammond, F. F.; Harris, O. A.; Hartl, R.; Manley, G. T.; Nemecek, A.; Newell, D. W.; Rosenthal, G.; Schouten, J.; Shutter, L.; Timmons, S. D.; Ullman, J. S.; Videtta, W.; Wilberger, J. E.; Wright, D. W. | 2007 | Older version of CPG |
| Guidelines for the management of severe traumatic brain injury. XI. Anesthetics, analgesics, and sedatives | Brain Trauma, Foundation; American Association of Neurological, Surgeons; Congress of Neurological, Surgeons; Joint Section on, Neurotrauma; Critical Care, Aans Cns; Bratton, S. L.; Chestnut, R. M.; Ghajar, J.; McConnell Hammond, F. F.; Harris, O. A.; Hartl, R.; Manley, G. T.; Nemecek, A.; Newell, D. W.; Rosenthal, G.; Schouten, J.; Shutter, L.; Timmons, S. D.; Ullman, J. S.; Videtta, W.; Wilberger, J. E.; Wright, D. W. | 2007 | Older version of CPG |
| Guidelines for the management of severe traumatic brain injury. XII. Nutrition                             | Brain Trauma, Foundation; American Association of Neurological, Surgeons; Congress of Neurological, Surgeons; Joint Section on, Neurotrauma; Critical Care, Aans Cns; Bratton, S. L.; Chestnut, R. M.; Ghajar, J.; McConnell Hammond, F. F.; Harris, O. A.; Hartl, R.; Manley, G. T.; Nemecek, A.; Newell, D. W.; Rosenthal, G.; Schouten, J.; Shutter, L.; Timmons, S. D.; Ullman, J. S.; Videtta, W.; Wilberger, J. E.; Wright, D. W. | 2007 | Older version of CPG |
| Guidelines for the management of severe traumatic brain injury. XIII. Antiepileptic prophylaxis            | Brain Trauma, Foundation; American Association of Neurological, Surgeons; Congress of Neurological, Surgeons; Joint Section on, Neurotrauma; Critical Care, Aans Cns; Bratton, S. L.; Chestnut, R. M.; Ghajar, J.; McConnell Hammond, F. F.; Harris, O. A.; Hartl, R.; Manley, G. T.; Nemecek, A.; Newell, D. W.; Rosenthal, G.; Schouten, J.; Shutter, L.; Timmons, S. D.; Ullman, J. S.; Videtta, W.; Wilberger, J. E.; Wright, D. W. | 2007 | Older version of CPG |

| Title                                                                                                                                                                                                                                                          | Authors                                                                                                                                                                                                                                                                                                                                                                                                                                 | Year | Reason for exclusion      |
|----------------------------------------------------------------------------------------------------------------------------------------------------------------------------------------------------------------------------------------------------------------|-----------------------------------------------------------------------------------------------------------------------------------------------------------------------------------------------------------------------------------------------------------------------------------------------------------------------------------------------------------------------------------------------------------------------------------------|------|---------------------------|
| Guidelines for the management of severe traumatic brain injury. XIV. Hyperventilation                                                                                                                                                                          | Brain Trauma, Foundation; American Association of Neurological, Surgeons; Congress of Neurological, Surgeons; Joint Section on, Neurotrauma; Critical Care, Aans Cns; Bratton, S. L.; Chestnut, R. M.; Ghajar, J.; McConnell Hammond, F. F.; Harris, O. A.; Hartl, R.; Manley, G. T.; Nemecek, A.; Newell, D. W.; Rosenthal, G.; Schouten, J.; Shutter, L.; Timmons, S. D.; Ullman, J. S.; Videtta, W.; Wilberger, J. E.; Wright, D. W. | 2007 | Older version of CPG      |
| Guidelines for the management of severe traumatic brain injury. XV. Steroids                                                                                                                                                                                   | Brain Trauma, Foundation; American Association of Neurological, Surgeons; Congress of Neurological, Surgeons; Joint Section on, Neurotrauma; Critical Care, Aans Cns; Bratton, S. L.; Chestnut, R. M.; Ghajar, J.; McConnell Hammond, F. F.; Harris, O. A.; Hartl, R.; Manley, G. T.; Nemecek, A.; Newell, D. W.; Rosenthal, G.; Schouten, J.; Shutter, L.; Timmons, S. D.; Ullman, J. S.; Videtta, W.; Wilberger, J. E.; Wright, D. W. | 2007 | Older version of CPG      |
| Guidelines for the management of severe traumatic brain injury: Updated in 2013. [Japanese]                                                                                                                                                                    | Maeda, T.; Yoshino, A.; Katayama, Y.                                                                                                                                                                                                                                                                                                                                                                                                    | 2013 | Recommendations not rated |
| Guidelines for the management of traumatic brain injury                                                                                                                                                                                                        | University Hospitals Sussex, NHS Foundation Trust                                                                                                                                                                                                                                                                                                                                                                                       | 2022 | Recommendation not rated  |
| Guidelines for the pharmacologic treatment of neurobehavioral sequelae of traumatic brain injury                                                                                                                                                               | Warden, D. L.; Gordon, B.; McAllister, T. W.; Silver, J. M.; Barth, J. T.; Bruns, J.; Drake, A.; Gentry, T.; Jagoda, A.; Katz, D. I.; Kraus, J.; Labbate, L. A.; Ryan, L. M.; Sparling, M. B.; Walters, B.; Whyte, J.; Zapata, A.; Zitnay, G.; Quinn, P.                                                                                                                                                                                | 2006 | Duplicate                 |
| Guidelines for the pre-hospital care of patients with severe head injuries                                                                                                                                                                                     | Piek, J.                                                                                                                                                                                                                                                                                                                                                                                                                                | 1998 | Recommendations not rated |
| Guidelines for the structure and function of an interdisciplinary team for persons with brain injury                                                                                                                                                           | No authors listed                                                                                                                                                                                                                                                                                                                                                                                                                       | 1995 | No Full-Text              |
| Guidelines for the structure and function of an interdisciplinary team for persons with brain injury. Joint Committee on Interprofessional Relations between Division 40 (Clinical Neuropsychology) of the American Psychological Association and the American | Anonymous                                                                                                                                                                                                                                                                                                                                                                                                                               | 1995 | No Full-Text              |
| Guidelines for the treatment of adults with severe head trauma (Part I). Initial assessment; evaluation and pre-hospital treatment; current criteria forhospital admission; systemic and cerebral monitoring                                                   | Procaccio, F.; Stocchetti, N.; Citerio, G.; Berardino, M.; Beretta, L.; Della Corte, F.; D'Avella, D.; Brambilla, G. L.; Delfini, R.; Servadei, F.; Tomei, G.                                                                                                                                                                                                                                                                           | 2000 | Paywall                   |

| Title                                                                                                                                                      | Authors                                                                                                                                                                       | Year | Reason for exclusion      |
|------------------------------------------------------------------------------------------------------------------------------------------------------------|-------------------------------------------------------------------------------------------------------------------------------------------------------------------------------|------|---------------------------|
| Guidelines for the treatment of adults with severe head trauma (part II). Criteria for medical treatment                                                   | Procaccio, F.; Stocchetti, N.; Citerio, G.; Berardino, M.; Beretta, L.; Della Corte, F.; D'Avella, D.; Brambilla, G. L.; Delfini, R.; Servadei, F.; Tomei, G.                 | 2000 | Duplicate                 |
| Guidelines for the treatment of adults with severe head trauma (Part II). Criteria for medical treatment                                                   | Procaccio, F.; Stocchetti, N.; Citerio, G.; Berardino, M.; Beretta, L.; Della Corte, F.; D'Avella, D.; Brambilla, G. L.; Delfini, R.; Servadei, F.; Tomei, G.                 | 2000 | Paywall                   |
| Guidelines for the treatment of adults with severe head trauma (Part III). Criteria for surgical treatment                                                 | Davella, D.; Brambilla, G. L.; Delfini, R.; Servadei, F.; Tomei, G.; Procaccio, F.; Stocchetti, N.; Citerio, G.; Berardino, M.; Beretta, L.; Della Corte, F.                  | 2000 | Paywall                   |
| Guidelines for treatment of sport-related concussions                                                                                                      | Martineau, C.; Kingma, J. J.; Bank, L.; McLeod, T. C.                                                                                                                         | 2007 | Recommendations not rated |
| Guidelines on indications for imaging in patients with suspected mild head injury. [German]                                                                | Zock, M.; Werner, J. C.; Bogner, V.; Biberthaler, P.; Kanz, K. G.; Leidel, B. A.                                                                                              | 2011 | Not a CPG                 |
| Guidelines on medical ethics for medical care of dying persons and severe cerebral injured patients. [German]                                              | Anonymous                                                                                                                                                                     | 1996 | No Full-Text              |
| Guidelines: Basic principles of neurorehabilitation for patients with acquired brain injury. Recommendations of the Spanish Society of Neurorehabilitation | Noe, E.; Gomez, A.; Bernabeu, M.; Quemada, I.; Rodriguez, R.; Perez, T.; Lopez, C.; Laxe, S.; Colomer, C.; Rios, M.; Juarez-Belaunde, A.; Gonzalez, C.; Pelayo, R.; Ferri, J. | 2021 | non-english               |
| Guidelines: Severe head trauma. [French]                                                                                                                   | Lapierre, F.                                                                                                                                                                  | 1998 | No Full-Text              |
| Harrogate consensus agreement: Cycling-specific sport-related concussion                                                                                   | Swart, J.; Bigard, X.; Fladischer, T.; Palfreeman, R.; Riepenhof, H.; Jones, N.; Heron, N.                                                                                    | 2021 | Not a CPG                 |
| Head concussion guidelines                                                                                                                                 | McNabb, J. W.                                                                                                                                                                 | 1995 | No Full-Text              |
| Head injury                                                                                                                                                | The Royal Children's Hospital Melbourne                                                                                                                                       | 2021 | Recommendations not rated |
| Head injury guidelines                                                                                                                                     | Emergency Health Services (EHS) - Nova Scotia Trauma Program                                                                                                                  | 2009 | Recommendations not rated |
| Head injury: Triage, assessment, investigation and early management of head injury in children, young people and adults (NICE guideline CG 176)            | Davis, T.; Ings, A.                                                                                                                                                           | 2015 | CPG Summary               |
| Head Trauma                                                                                                                                                | Joint Royal Colleges Ambulance Liason Committee                                                                                                                               | 2006 | Recommendations not rated |
| Head trauma in children: Guidelines for neuroradiological diagnosis. [Italian]                                                                             | Bernardi, B.; Sandri, F.; Agati, R.; Barbara, C.                                                                                                                              | 1998 | Paywall                   |
| Head trauma: guidelines for care                                                                                                                           | Aumick, J. E.                                                                                                                                                                 | 1991 | No Full-Text              |
| Head injury (mild to severe): Early diagnostic strategies.                                                                                                 | Moola, S                                                                                                                                                                      | 2021 | CPG Summary               |
| Head injury: Nutritional support.                                                                                                                          | Jayasekara, R                                                                                                                                                                 | 2021 | CPG Summary               |
| HEADCASE- Extended Guidelines                                                                                                                              | England Rugby                                                                                                                                                                 | 2021 | Recommendation not rated  |
| Health care for homeless women                                                                                                                             | The American College of Obstetricians and Gynecologists                                                                                                                       | 2013 | Adaptation of CPG         |

| Title                                                                                                                                                                                               | Authors                      | Year | Reason for exclusion          |
|-----------------------------------------------------------------------------------------------------------------------------------------------------------------------------------------------------|------------------------------|------|-------------------------------|
| Health needs of homeless children and families. American Academy of Pediatrics, Committee on Community Health Services                                                                              | Anonymous                    | 1996 | Recommendations not rated     |
| Homelessness in the Eastern Health Board: recommendations of a multidisciplinary group (187 KB)                                                                                                     | Eastern Health Board (EHB)   | 1999 | Recommendations not rated     |
| Hospital to community transition planning for acquired brain injury (ABI): A best practice guideline                                                                                                | Toronto ABI Network          | 2020 | Not TBI specific              |
| How can health care systems effectively deal with the major health care needs of homeless people?                                                                                                   | World Health Organization    | 2005 | Not a CPG                     |
| Hyperosmolar therapy in the treatment of severe head injury in children: mannitol and hypertonic saline                                                                                             | Knapp, J. M.                 | 2005 | Recommendations not rated     |
| Ictrs: Phenytoin vs levetiracetam.                                                                                                                                                                  | Sharma, L                    | 2021 | CPG summary                   |
| Improving hospital admission and discharge for people who are homeless.                                                                                                                             | Homeless Link                | 2012 | Recommendations not rated     |
| In patients with head injuries who undergo rapid sequence intubation using succinylcholine, does pretreatment with a competitive neuromuscular blocking agent improve outcome? A literature review. | Clancy et al.                | 2001 | Not a CPG                     |
| Incidence, risk factors and prevention of mild traumatic brain injury: results of the who collaborating centre task force on mild traumatic brain injury                                            | Cassidy et al.               | 2004 | Not a CPG                     |
| INCOG guidelines for cognitive rehabilitation following traumatic brain injury                                                                                                                      | Bayley et al.                | 2014 | Older version of CPG          |
| Indications for computed tomography in patients with minor head injury                                                                                                                              | Haydel M.                    | 2000 | Recommendations not rated     |
| Indications for intracranial pressure monitoring                                                                                                                                                    | Anonymous                    | 1996 | Older version of CPG          |
| Indications for intracranial pressure monitoring. Brain Trauma Foundation                                                                                                                           | Anonymous                    | 1996 | Older version of CPG          |
| Injury control recommendations for bicycle helmets. Centers for Disease Control and Prevention                                                                                                      | Anonymous                    | 1995 | No Full-Text                  |
| Injury-control recommendations: bicycle helmets. National Center for Injury Prevention and Control, Centers for Disease Control and Prevention                                                      | Anonymous                    | 1995 | Not a TBI or Homelessness CPG |
| Interassociation Consensus: Diagnosis and Management of Sport-Related Concussion Best Practices                                                                                                     | NCAA Sport Science Institute | 2016 | Recommendations not rated     |
| Inter-professional clinical practice guideline for vocational evaluation following traumatic brain injury                                                                                           | Stergiou-Kita, Mary          | 2011 | Duplicate                     |

| <b>Title</b>                                                                                                        | <b>Authors</b>                                                                                                                                                                              | <b>Year</b> | <b>Reason for exclusion</b>         |
|---------------------------------------------------------------------------------------------------------------------|---------------------------------------------------------------------------------------------------------------------------------------------------------------------------------------------|-------------|-------------------------------------|
| Intracranial pressure treatment threshold. Brain Trauma Foundation                                                  | Anonymous                                                                                                                                                                                   | 1996        | Older version of CPG                |
| Joint policy statement--guidelines for care of children in the emergency department                                 | American Academy of Pediatrics, Committee on Pediatric Emergency Medicine; American College of Emergency Physicians, Pediatric Committee; Emergency Nurses Association, Pediatric Committee | 2013        | Not a TBI or Homelessness CPG       |
| Mild Traumatic Brain Injury in Children: Just Another Bump on the Head?                                             | Cook et al.                                                                                                                                                                                 | 2006        | Not a CPG                           |
| Recommendations for Diagnosing a Mild Traumatic Brain Injury: A National Academy of Neuropsychology Education Paper | Ruff et al.                                                                                                                                                                                 | 2009        | Not a CPG/Recommendations not rated |
| Summary of evidence-based guideline update: Evaluation and management of concussion in sports                       | American Academy of Neurology                                                                                                                                                               | 2013        | Summary                             |
| The Management of Traumatic Brain Injury in Children: Opportunities for Action                                      | Centers for Disease Control and Prevention and National Center for Injury Prevention and Control                                                                                            | 2018        | Not a CPG                           |
| ThinkFirst—Sport Smart Concussion Education and Awareness Program. Return to play (or activity) guidelines.         | Parachute                                                                                                                                                                                   | No year     | Recommendations not rated           |

### Supplementary File 3. Data Extraction and Synthesis

**Table 1a. Data Extraction for Clinical Practice Guidelines for TBI**

#### Definitions

|                                             |                                                                                                                                                                                                                                                                                                                                                                                                                                                                                                                                                                                                                                                                                     |
|---------------------------------------------|-------------------------------------------------------------------------------------------------------------------------------------------------------------------------------------------------------------------------------------------------------------------------------------------------------------------------------------------------------------------------------------------------------------------------------------------------------------------------------------------------------------------------------------------------------------------------------------------------------------------------------------------------------------------------------------|
| <b>Text-Positive vs. Text-Negative</b>      | <ul style="list-style-type: none"> <li>Text-Positive = Contain <math>\geq 1</math> keyword for/content consistent with homelessness in text</li> <li>Text-Negative = Do not contain any keyword for/content consistent with homelessness in text</li> </ul>                                                                                                                                                                                                                                                                                                                                                                                                                         |
| <b>Category of Text-Positive Guidelines</b> | <ul style="list-style-type: none"> <li>Category 1 = Guideline specifically recommends evidence-based diagnostic, management, or treatment approaches for individuals experiencing homelessness or with lived experience of homelessness</li> <li>Category 2 = Guideline acknowledges or makes reference to data (e.g., epidemiologic, risk factors, outcome) regarding individuals experiencing homelessness or with lived experience of homelessness only, without recommendations</li> <li>Category 3 = Guideline mentions individuals experiencing homelessness or with lived experience of homelessness without context related to the literature or recommendations</li> </ul> |
| <b>Category of Text-Negative Guidelines</b> | <ul style="list-style-type: none"> <li>Category 1 = Reference lists contain articles that include keywords for homelessness, but the text of the guideline does not contain any keywords for/content consistent with the definition of homelessness</li> <li>Category 2 = No article in the reference list includes keywords for homelessness</li> </ul>                                                                                                                                                                                                                                                                                                                            |

| <b>Author(s). Year. Guideline Name</b><br><br><b>Country</b><br><br><b>Source</b>                                                                                                                                                          | <b>Focus of the Guideline</b><br><br><b>Target Population of the Guideline</b><br><br><b>Target Audience of Guideline</b>                                | <b>Text-Positive vs. Text-Negative</b> | <b>Category of Text-Positive Guidelines &amp; Data Used to Categorize Guideline (Where Applicable)</b>                                                                                                                                                                                                                                                                                                                                                | <b>Category of Text-Negative Guidelines &amp; Data Used to Categorize Guideline (Where Applicable)</b> |
|--------------------------------------------------------------------------------------------------------------------------------------------------------------------------------------------------------------------------------------------|----------------------------------------------------------------------------------------------------------------------------------------------------------|----------------------------------------|-------------------------------------------------------------------------------------------------------------------------------------------------------------------------------------------------------------------------------------------------------------------------------------------------------------------------------------------------------------------------------------------------------------------------------------------------------|--------------------------------------------------------------------------------------------------------|
| Alali et al. (2017). Beta-blockers and TBI. A systematic review, meta-analysis, and Eastern Association for the Surgery of Trauma guideline.<br><br>Canada & United States<br><br>Peer-reviewed literature                                 | Acute Management<br><br>Adults (≥16 yrs) w/acute TBI, severe TBI who are admitted to ICU<br><br>HCPs w/in acute setting (specifically ICU)               | Text-Negative                          | N/A                                                                                                                                                                                                                                                                                                                                                                                                                                                   | Category 2                                                                                             |
| American College of Emergency Physicians. (2023). Clinical policy: Critical issues in the management of adult patients presenting to the emergency department with mild traumatic brain injury<br><br>United States<br><br>Grey Literature | Emergency department evaluation and management of blunt head trauma or mild TBI/concussion<br><br>Adults (≥16 yrs) w/mild closed head injury<br><br>HCPs | Text-Positive                          | Category 2<br><br>“Current data may underestimate the true burden of this injury as people who do not seek medical care after a head injury and patients see in outpatient, federal, military or the United States Department of Veterans Affairs (VA) settings may not be included in published reports. Racial and ethnic minorities, people who experience homelessness, people who are in correctional and detention facilities, and survivors of | N/A                                                                                                    |

| <b>Author(s). Year. Guideline Name</b><br><br><b>Country</b><br><br><b>Source</b>                                                                                                                                                                                                                                              | <b>Focus of the Guideline</b><br><br><b>Target Population of the Guideline</b><br><br><b>Target Audience of Guideline</b>                                                                                                                       | <b>Text-Positive vs. Text-Negative</b> | <b>Category of Text-Positive Guidelines &amp; Data Used to Categorize Guideline (Where Applicable)</b> | <b>Category of Text-Negative Guidelines &amp; Data Used to Categorize Guideline (Where Applicable)</b> |
|--------------------------------------------------------------------------------------------------------------------------------------------------------------------------------------------------------------------------------------------------------------------------------------------------------------------------------|-------------------------------------------------------------------------------------------------------------------------------------------------------------------------------------------------------------------------------------------------|----------------------------------------|--------------------------------------------------------------------------------------------------------|--------------------------------------------------------------------------------------------------------|
|                                                                                                                                                                                                                                                                                                                                |                                                                                                                                                                                                                                                 |                                        | intimate partner violence are groups disproportionately affected by TBI.”                              |                                                                                                        |
| Astrand et al. (2016). Scandinavian guidelines for initial management of minor and moderate head trauma in children.<br><br>Scandinavian Countries<br><br>Peer-reviewed literature                                                                                                                                             | Acute management (w/in first 24 hrs following injury)<br><br>Children (<18 yrs) w/mild and moderate TBI<br><br>Physicians in EDs, including pediatric EDs, and GPs                                                                              | Text-Negative                          | N/A                                                                                                    | Category 2                                                                                             |
| Badjatia et al. (2008). Guidelines for prehospital management of TBI 2nd edition.<br><br>United States<br><br>Peer-reviewed literature                                                                                                                                                                                         | Pre-hospital management<br><br>Persons w/TBI (adults and pediatric)<br><br>Emergency medical services providers                                                                                                                                 | Text-Negative                          | N/A                                                                                                    | Category 2                                                                                             |
| Bayley et al. (2023). INCOG guidelines for cognitive rehabilitation following TBI<br><br>International<br><br>Peer-reviewed literature                                                                                                                                                                                         | Cognitive rehabilitation in all relevant phases of care<br><br>Adults (≥18 yrs) w/moderate or severe TBI<br><br>HCPs and other stakeholders (e.g., rehabilitation support workers providing care for persons w/TBI, persons w/TBI and families) | Text-Negative                          | N/A                                                                                                    | Category 2                                                                                             |
| Broglia et al. (2014). National Athletic Trainers' Association position statement: Management of sport concussion.<br><br>United States<br><br>Peer-reviewed literature                                                                                                                                                        | Management of sports-related concussion, including education and prevention and evaluation and return to play<br><br>Persons w/sports-related concussion (adults and children)<br><br>Athletic trainers, physicians, and other HCPs             | Text-Negative                          | N/A                                                                                                    | Category 2                                                                                             |
| Carney et al. (2017). Guidelines for the management of severe TBI, 4th edition.<br><br>Gregory et al. (2020). Guidelines for the management of severe TBI: 2020 update of the decompressive craniectomy recommendations.*<br><br>United States<br><br>Peer-reviewed literature<br><br>*Update of a chapter within the 2017 CPG | Tx interventions, monitoring, and tx thresholds specific to TBI<br><br>Adult persons w/severe TBI<br><br>HCPs                                                                                                                                   | Text-Negative                          | N/A                                                                                                    | Category 2                                                                                             |



| <b>Author(s). Year. Guideline Name</b>                                                                                                                                   | <b>Focus of the Guideline</b>                                                                                                                                                                                                                             | <b>Text-Positive vs. Text-Negative</b> | <b>Category of Text-Positive Guidelines &amp; Data Used to Categorize Guideline (Where Applicable)</b> | <b>Category of Text-Negative Guidelines &amp; Data Used to Categorize Guideline (Where Applicable)</b> |
|--------------------------------------------------------------------------------------------------------------------------------------------------------------------------|-----------------------------------------------------------------------------------------------------------------------------------------------------------------------------------------------------------------------------------------------------------|----------------------------------------|--------------------------------------------------------------------------------------------------------|--------------------------------------------------------------------------------------------------------|
| <b>Country</b>                                                                                                                                                           | <b>Target Population of the Guideline</b>                                                                                                                                                                                                                 |                                        |                                                                                                        |                                                                                                        |
| <b>Source</b>                                                                                                                                                            | <b>Target Audience of Guideline</b>                                                                                                                                                                                                                       |                                        |                                                                                                        |                                                                                                        |
| Chang et al., (2003). Practice parameter: Antiepileptic drug prophylaxis in severe TBI.<br><br>United States<br><br>Grey Literature                                      | Management, use of antiepileptic drug prophylaxis<br><br>Adults w/severe TBI<br><br>HCPs                                                                                                                                                                  | Text-Negative                          | N/A                                                                                                    | Category 2                                                                                             |
| Da Dalt et al. (2018). Italian guidelines on the ax and management of pediatric head injury in the ED.<br><br>Italy<br><br>Peer-reviewed literature                      | Ax and Management in the ED<br><br>Children (<16 yrs) w/blunt head trauma<br><br>Pediatric and adult physicians in ED                                                                                                                                     | Text-Negative                          | N/A                                                                                                    | Category 2                                                                                             |
| DeMatteo et al. (2020). Concussion management for children has changed: New pediatric protocols using the latest evidence.<br><br>Canada<br><br>Peer-reviewed literature | Management (return to activity and return to school)<br><br>Children and youth w/concussive injury(agenot specified)<br><br>HCPs, children, and family members(parents) (inferred)                                                                        | Text-Negative                          | N/A                                                                                                    | Category 2                                                                                             |
| Evans et al. (2022). Acute mTBI (concussion) in adults.<br><br>United States<br><br>Grey Literature                                                                      | Presentation, evaluation, and management<br><br>Adults w/mTBI<br><br>HCPs                                                                                                                                                                                 | Text-Negative                          | N/A                                                                                                    | Category 2                                                                                             |
| French Language Resuscitation Society et al. (2000). Management of severe TBI in the early phase.<br><br>France<br><br>Peer-reviewed literature                          | Early management<br><br>Persons w/severe TBI (adults and children)<br><br>HCPs                                                                                                                                                                            | Text-Negative                          | N/A                                                                                                    | Category 2                                                                                             |
| Geeraerts et al. (2018). Management of severe TBI(first 24 hrs).<br><br>France<br><br>Peer-reviewed literature                                                           | Early/acute (first 24 hrs) management of severe TBI<br><br>Persons w/severe TBI (adults and children)<br><br>HCPs                                                                                                                                         | Text-Negative                          | N/A                                                                                                    | Category 2                                                                                             |
| Giza et al. (2013). Evidence-based guideline update: Evaluation and management of concussion in sports.<br><br>United States<br><br>Grey Literature                      | Evaluation and management of sport concussion<br><br>Athletes w/concussion (age not specified)<br>Licensed Health Care Practitioners<br><br>Australian HCPs, patients presenting to GP for care who have been hospitalized for a TBI due to road accident | Text-Negative                          | N/A                                                                                                    | Category 2                                                                                             |
| Harmon et al. (2018). American Medical Society for Sports Medicine position statement on concussion in sport.<br><br>United States<br><br>References of Included CPG     | Dx and management<br><br>Person's w/sports related concussion (age not specified)<br><br>HCPs                                                                                                                                                             | Text-Negative                          | N/A                                                                                                    | Category 2                                                                                             |

| Author(s). Year. Guideline Name<br>Country<br>Source                                                                                                                                                        | Focus of the Guideline<br>Target Population of the Guideline<br>Target Audience of Guideline                                            | Text-Positive vs. Text-Negative | Category of Text-Positive Guidelines & Data Used to Categorize Guideline (Where Applicable) | Category of Text-Negative Guidelines & Data Used to Categorize Guideline (Where Applicable) |
|-------------------------------------------------------------------------------------------------------------------------------------------------------------------------------------------------------------|-----------------------------------------------------------------------------------------------------------------------------------------|---------------------------------|---------------------------------------------------------------------------------------------|---------------------------------------------------------------------------------------------|
| INESSS and ONF. (2016). CPG for the rehabilitation of adults w/moderate to severe TBI.<br>Canada<br>References of Included CPG                                                                              | Ax and management<br>Adults w/moderate to severe TBI<br>HCPs                                                                            | Text-Negative                   | N/A                                                                                         | Category 2                                                                                  |
| Kennedy et al. (2008). Intervention for executive functions after TBI: A systematic review, meta-analysis and clinical recommendations.<br>United States<br>References of Included CPG                      | Management (problem solving, planning, organisation, and multi-tasking)<br>Persons w/TBI (children and adults)<br>HCPs (inferred)       | Text-Negative                   | N/A                                                                                         | Category 2                                                                                  |
| Kochanek et al. (2019). Guidelines for the management of pediatric severe TBI, 3 <sup>rd</sup> edition: Update of the Brain Trauma Foundation Guidelines.<br>United States<br>Peer-reviewed literature      | Management and critical care<br>Children w/severe TBI ( $\leq 18$ yrs)<br>HCPs                                                          | Text-Negative                   | N/A                                                                                         | Category 2                                                                                  |
| Liao et al. (2009). CPGs in severe TBI in Taiwan.<br>Taiwan<br>Peer-reviewed literature                                                                                                                     | Management<br>Persons w/severe TBI (adults and children)<br>HCPs (inferred)                                                             | Text-Negative                   | N/A                                                                                         | Category 2                                                                                  |
| Lim et al. (2021). Sleep-wake disorders in patients w/TBI.<br>United States<br>Grey Literature                                                                                                              | Features, evaluation, and tx of sleep-wake disorders<br>Persons w/TBI (age and severity not specified)<br>HCPs                          | Text-Negative                   | N/A                                                                                         | Category 2                                                                                  |
| Luaute et al. (2016). Behavioral and affective disorders after brain injury: French guidelines for prevention and community supports.<br>France<br>Peer-reviewed literature                                 | Prevention (of behavioural and affective disorders) for outpatients and identify support systems<br>Adults w/TBI and caregivers<br>HCPs | Text-Negative                   | N/A                                                                                         | Category 2                                                                                  |
| Luaute et al. (2016). Care management of the agitation or aggressiveness crisis in patients w/TBI. Systematic review of the literature and practicerecommendations.<br>France<br>References of Included CPG | Management of agitation and aggressiveness<br>Adults w/moderate-severe TBI<br>HCPs (inferred)                                           | Text-Negative                   | N/A                                                                                         | Category 2                                                                                  |
| Lumba-Brown et al. (2018). CDC guideline on the dx and management of mTBI among children.<br>United States<br>Peer-reviewed literature                                                                      | Dx, prognosis, and management/tx (including return to school)<br>Children w mTBI ( $\leq 18$ yrs)<br>HCPs                               | Text-Negative                   | N/A                                                                                         | Category 2                                                                                  |

| <b>Author(s). Year. Guideline Name</b><br><br><b>Country</b><br><br><b>Source</b>                                                                                                                                                        | <b>Focus of the Guideline</b><br><br><b>Target Population of the Guideline</b><br><br><b>Target Audience of Guideline</b>                                                                                                                                                                                                                                                                                                                                                                                                                                                           | <b>Text-Positive vs. Text-Negative</b> | <b>Category of Text-Positive Guidelines &amp; Data Used to Categorize Guideline (Where Applicable)</b> | <b>Category of Text-Negative Guidelines &amp; Data Used to Categorize Guideline (Where Applicable)</b> |
|------------------------------------------------------------------------------------------------------------------------------------------------------------------------------------------------------------------------------------------|-------------------------------------------------------------------------------------------------------------------------------------------------------------------------------------------------------------------------------------------------------------------------------------------------------------------------------------------------------------------------------------------------------------------------------------------------------------------------------------------------------------------------------------------------------------------------------------|----------------------------------------|--------------------------------------------------------------------------------------------------------|--------------------------------------------------------------------------------------------------------|
| Marshall et al. (2015). Updated CPGs for concussion/mTBI and persistent sxs.<br><br>Canada<br><br>Peer-reviewed literature                                                                                                               | Ax and early/chronic management<br><br>Adults (≥18 yrs) w/mTBI and persistent sxs<br><br>HCPs who provide services to those with mTBI including family physicians, primary healthcare providers, neurologists, physiatrists, psychiatrists, psychologists/neuropsychologists, counsellors, PTs, OTs, and nurses                                                                                                                                                                                                                                                                     | Text-Negative                          | N/A                                                                                                    | Category 2                                                                                             |
| Meehan et al. (2022). Concussion in children and adolescents: Management.<br><br>United States<br><br>Grey Literature                                                                                                                    | Management<br><br>Children and adolescents w/concussion<br><br>HCPs                                                                                                                                                                                                                                                                                                                                                                                                                                                                                                                 | Text-Negative                          | N/A                                                                                                    | Category 2                                                                                             |
| Morgan et al. (2017). CPG for the management of communication and swallowing disorders following paediatric TBI.<br><br>Australia<br><br>References of Included CPG                                                                      | Ax, and acute and rehabilitation management of speech, language, and swallowing after paediatric TBI<br><br>Children (<18 yrs) w/moderate or severe TBI, w/in 1st yr of recovery and are risk for or are presenting w/speech, language and or swallowing disorders<br><br>Hospital and community-based HCPs involved in the acute and rehab management of speech, language, and swallowing disorders in children after TBI; specifically includes speech-language pathologists, doctors, nurses, and other relevant allied health specialists (PTs, OTs, psychologists, dietitians) | Text-Negative                          | N/A                                                                                                    | Category 2                                                                                             |
| Motor Accidents Authority of New South Wales. (2008). Guidelines for mTBI following a closed head injury.<br><br>Australia<br><br>References of Included CPG                                                                             | Acute and post-acute dx and management<br><br>Adults (>16 yrs) 6 mos following mTBI, closed head injury<br><br>Clinicians from prehospital, ED, and general practice                                                                                                                                                                                                                                                                                                                                                                                                                | Text-Negative                          | N/A                                                                                                    | Category 2                                                                                             |
| National Institute for Health and Clinical Excellence. (2014). Head Injury. Triage, ax, investigation, and early management of head injury in children, young people and adults.<br><br>United Kingdom<br><br>References of Included CPG | Dx and early management<br><br>Infants (<1 yr), children (<16 yrs), adults w/TBI (all severity)<br><br>HCPs including pre-hospital, EDs (not ICU or neurosurgical units), patients and caregiver                                                                                                                                                                                                                                                                                                                                                                                    | Text-Negative                          | N/A                                                                                                    | Category 2                                                                                             |
| National Institute for Health and Clinical Excellence. (2014). Head Injury: Ax and early management.<br><br>United Kingdom<br><br>References of Included CPG                                                                             | Ax and early management<br>Persons w/TBI (children, young people, and adults)<br><br>HCPs, people w/TBI, their families and carers                                                                                                                                                                                                                                                                                                                                                                                                                                                  | Text-Negative                          | N/A                                                                                                    | Category 2                                                                                             |

| <b>Author(s). Year. Guideline Name</b><br><br><b>Country</b><br><br><b>Source</b>                                                                                                                                           | <b>Focus of the Guideline</b><br><br><b>Target Population of the Guideline</b><br><br><b>Target Audience of Guideline</b>                                                                                                                                                                                                                                                      | <b>Text-Positive vs. Text-Negative</b> | <b>Category of Text-Positive Guidelines &amp; Data Used to Categorize Guideline (Where Applicable)</b> | <b>Category of Text-Negative Guidelines &amp; Data Used to Categorize Guideline (Where Applicable)</b> |
|-----------------------------------------------------------------------------------------------------------------------------------------------------------------------------------------------------------------------------|--------------------------------------------------------------------------------------------------------------------------------------------------------------------------------------------------------------------------------------------------------------------------------------------------------------------------------------------------------------------------------|----------------------------------------|--------------------------------------------------------------------------------------------------------|--------------------------------------------------------------------------------------------------------|
| National Institute of Excellence in Health and Social Services (INESSS). (2021). Ax and management of the risk of serious neurological complications following mTBI.<br><br>Canada<br><br>Grey Literature                   | Ax and management of serious neurological complications post mTBI<br><br>Adults and children w/mTBI in ER<br><br>HCPs (EDs and neurotrauma centre)                                                                                                                                                                                                                             | Text-Negative                          | N/A                                                                                                    | Category 2                                                                                             |
| New South Wales Ministry of Health. (2011). Adult trauma CPG. Initial management of closed head injury in adults<br><br>Australia<br><br>References of Included CPG                                                         | Initial management<br><br>Adults (>16 yrs) w/mild, moderate and severe TBI (closed-head injuries)<br><br>Clinicians managing patients w/closed head injury in major and regional trauma services, and urban and rural hospitals                                                                                                                                                | Text-Negative                          | N/A                                                                                                    | Category 2                                                                                             |
| New Zealand Guidelines Group. (2006). TBI: Dx, acute management and rehabilitation.<br><br>New Zealand<br><br>References of Included CPG                                                                                    | Acute care and post-acute rehabilitation<br><br>Persons w/ TBI (all ages and severities)<br><br>All TBI acute and rehabilitation tx providers and specialists throughout New Zealand; funding agencies such as the Accident Compensation Corporation and District Health Boards; and people w/ TBI and the people who care for them, including family/Whānau and unpaid carers | Text-Negative                          | N/A                                                                                                    | Category 2                                                                                             |
| ONF. (2018). Guideline for concussion/mTBI & prolonged sxs.<br><br>Canada<br><br>References of Included CPG                                                                                                                 | Ax and tx of persistent sxs<br><br>Adults (≥18 yrs) w/mTBI/concussion<br><br>HCPs including primary care providers (family physicians, nurse practitioners), neurologists, physiatrists, psychiatrists, psychologists, OTs, speech language pathologists, PTs, chiropractors, SWs and counselors                                                                               | Text-Negative                          | N/A                                                                                                    | Category 2                                                                                             |
| ONF. (2021). Guideline for diagnosing and managing pediatric concussion.<br><br>Canada<br><br>References of Included CPG                                                                                                    | Dx and management<br><br>Children (≤18 yrs) w/concussion<br><br>Health care providers or stakeholders who deliver services to children and youth w/concussion                                                                                                                                                                                                                  | Text-Negative                          | N/A                                                                                                    | Category 2                                                                                             |
| Pediatric mTBI Guideline Workgroup. (2016). Systematic review and clinical recommendations for healthcare providers on the dx and management of mTBI among children.<br><br>United States<br><br>References of Included CPG | Dx, prognosis and management<br><br>Children (≤18 yrs) w/mTBI<br><br>HCPs                                                                                                                                                                                                                                                                                                      | Text-Negative                          | N/A                                                                                                    | Category 2                                                                                             |

| <b>Author(s). Year. Guideline Name</b><br><br><b>Country</b><br><br><b>Source</b>                                                                                                   | <b>Focus of the Guideline</b><br><br><b>Target Population of the Guideline</b><br><br><b>Target Audience of Guideline</b>                                                                                                                                                                                                   | <b>Text-Positive vs. Text-Negative</b> | <b>Category of Text-Positive Guidelines &amp; Data Used to Categorize Guideline (Where Applicable)</b> | <b>Category of Text-Negative Guidelines &amp; Data Used to Categorize Guideline (Where Applicable)</b> |
|-------------------------------------------------------------------------------------------------------------------------------------------------------------------------------------|-----------------------------------------------------------------------------------------------------------------------------------------------------------------------------------------------------------------------------------------------------------------------------------------------------------------------------|----------------------------------------|--------------------------------------------------------------------------------------------------------|--------------------------------------------------------------------------------------------------------|
| Quatman-yates et al. (2020). Physical therapy evaluation and tx after concussion/mTBI.<br><br>United States<br><br>Peer-reviewed literature                                         | Active rehabilitation (physical therapy evaluation and management)<br><br>Persons w/mTBI (≥8 yrs) who have movement-related impairments from TBI<br><br>PTs                                                                                                                                                                 | Text-Negative                          | N/A                                                                                                    | Category 2                                                                                             |
| Ryan et al. (2020). ACR appropriateness criteria head trauma – child.<br><br>United States<br><br>Peer-reviewed literature                                                          | Dx and acute management<br><br>Children w/subacute, acute/chronic TBI all severity (<16 yrs)<br><br>Radiologists, radiation oncologists and referring physicians                                                                                                                                                            | Text-Negative                          | N/A                                                                                                    | Category 2                                                                                             |
| Rytter et al. (2021). National clinical guideline for non-pharmacological treatment of long-term symptoms after concussion.<br><br>Denmark<br><br>Grey Literature                   | Rehabilitation<br><br>Adults (≥18 yrs) diagnosed with a concussion in hospital or in the primary sector, and who experience long-lasting symptoms ≥4 weeks after the concussion<br><br>HCPs, Allied health professionals, and families/caregivers/persons with TBI                                                          | Text-Negative                          | N/A                                                                                                    | Category 2                                                                                             |
| Schutzman. (2021). Minor head trauma in infants and children: Management.<br><br>United States<br><br>Grey Literature                                                               | Management<br><br>Infants and children w/mTBI<br><br>HCPs                                                                                                                                                                                                                                                                   | Text-Negative                          | N/A                                                                                                    | Category 2                                                                                             |
| Schytz. (2021). Post-traumatic headache.<br><br>United States<br><br>Grey Literature                                                                                                | Tx and prognosis<br><br>Persons w/TBI (age and severity not specified)<br><br>HCPs                                                                                                                                                                                                                                          | Text-Negative                          | N/A                                                                                                    | Category 2                                                                                             |
| Scottish Intercollegiate Guidelines Network. (2009). Early management of patients w/a head injury: A national clinical guideline.<br><br>Scotland<br><br>References of Included CPG | Early management<br><br>Persons w/TBI (adults and children)<br><br>Those who have responsibility for the care of patients w/head injury, including pre-hospital care, general practice, EDs, radiology, surgical and critical care specialities, paediatric and rehab services; members of voluntary organization; patients | Text-Negative                          | N/A                                                                                                    | Category 2                                                                                             |
| Shih et al. (2021). ACR Appropriateness Criteria head trauma: 2021 update.<br><br>United States<br><br>Peer-reviewed literature                                                     | Dx and acute management<br>Adults w/ subacute, acute, or chronic TBI all severity (≥16 yrs)<br><br>Radiologists, radiation oncologists and referring physicians                                                                                                                                                             | Text-Negative                          | N/A                                                                                                    | Category 2                                                                                             |

| <b>Author(s). Year. Guideline Name</b><br><br><b>Country</b><br><br><b>Source</b>                                                                                                                                                           | <b>Focus of the Guideline</b><br><br><b>Target Population of the Guideline</b><br><br><b>Target Audience of Guideline</b>                                                                                                                                                                                                                                                                                                                                                                                                                                                                                                 | <b>Text-Positive vs. Text-Negative</b> | <b>Category of Text-Positive Guidelines &amp; Data Used to Categorize Guideline (Where Applicable)</b>                                                                                                                                                                                                                                                                                                                    | <b>Category of Text-Negative Guidelines &amp; Data Used to Categorize Guideline (Where Applicable)</b> |
|---------------------------------------------------------------------------------------------------------------------------------------------------------------------------------------------------------------------------------------------|---------------------------------------------------------------------------------------------------------------------------------------------------------------------------------------------------------------------------------------------------------------------------------------------------------------------------------------------------------------------------------------------------------------------------------------------------------------------------------------------------------------------------------------------------------------------------------------------------------------------------|----------------------------------------|---------------------------------------------------------------------------------------------------------------------------------------------------------------------------------------------------------------------------------------------------------------------------------------------------------------------------------------------------------------------------------------------------------------------------|--------------------------------------------------------------------------------------------------------|
| Silverberg et al. (2013). Is rest after concussion “the best medicine?”: Recommendations for activity resumption following concussion in athletes, civilians, and military service members.<br><br>Canada<br><br>References of Included CPG | Activity resumption<br><br>Persons w/mTBI (age not specified)<br><br>HCPs (inferred)                                                                                                                                                                                                                                                                                                                                                                                                                                                                                                                                      | Text-Negative                          | N/A                                                                                                                                                                                                                                                                                                                                                                                                                       | Category 2                                                                                             |
| Stergiou-Kita et al. (2012). Inter-professional CPG for vocational evaluation following TBI: A systematic and evidence-based approach.<br><br>Canada<br><br>Peer-reviewed literature                                                        | Vocational evaluation<br><br>Adults w/TBI all severity (18-65 yrs)<br><br>Health care and vocational professionals, employers, and individuals w/TBI                                                                                                                                                                                                                                                                                                                                                                                                                                                                      | Text-Negative                          | N/A                                                                                                                                                                                                                                                                                                                                                                                                                       | Category 2                                                                                             |
| Tan et al. (2017). The screening and management of pituitary dysfunction following TBI in adults: British Neurotrauma Group guidance.<br><br>United Kingdom<br><br>References of Included CPG                                               | Screening and management of pituitary dysfunction post-TBI<br><br>Adults w/TBI (severity not specified)<br><br>HCPs (primarily neurosurgeons but also clinicians from intensive care, surgery, and medicine)                                                                                                                                                                                                                                                                                                                                                                                                              | Text-Negative                          | N/A                                                                                                                                                                                                                                                                                                                                                                                                                       | Category 2                                                                                             |
| Tenney et al. (2021). Practice guideline: Use of quantitative EEG for the dx of mTBI: Report of the guideline committee of the American Clinical Neurophysiology Society.<br><br>United States<br><br>Peer-reviewed literature              | Dx of mTBI (using EEG)<br><br>Persons w/mTBI (age not specified)<br><br>HCPs                                                                                                                                                                                                                                                                                                                                                                                                                                                                                                                                              | Text-Negative                          | N/A                                                                                                                                                                                                                                                                                                                                                                                                                       | Category 2                                                                                             |
| The Management and Rehabilitation of Post-Acute mTBI Work Group. (2021). VA/DoD CPG for the management and rehabilitation of post-acute mTBI.<br><br>United States<br><br>Grey Literature                                                   | Post-acute management and rehabilitation<br><br>Adults w/mTBI who are eligible for care in the VA or DoD healthcare delivery systems and those receiving care from community-based clinicians; includes veterans, deployed and non-deployed active-duty service members, national guard, reserve members, reserve officer training corps cadets, those in military academies and their dependents<br><br>VA and DoD primary care providers, including nurse practitioners, physician assistants, nurses, pharmacists, psychologists, SWs, and those in community practice involved in care of service members or veterans | Text-Positive                          | Category 3<br><br>“Case managers may:<br>- Provide coordination of care as outlined in individualized tx plan (referrals, authorizations, appointments/reminders)<br>- Provide advocacy and support for Veteran/Service Member and caregivers<br>- Reinforce early interventions and education<br>- Address psychosocial issues (financial, family, housing, or school/work)<br>- Connect patient to available resources” | N/A                                                                                                    |

| <b>Author(s). Year. Guideline Name</b><br><br><b>Country</b><br><br><b>Source</b>                                                                                                                                                     | <b>Focus of the Guideline</b><br><br><b>Target Population of the Guideline</b><br><br><b>Target Audience of Guideline</b>                                                                                                                                                                                                                                                                                                                                                                                                                 | <b>Text-Positive vs. Text-Negative</b> | <b>Category of Text-Positive Guidelines &amp; Data Used to Categorize Guideline (Where Applicable)</b>                                                                                                                                                                                                                                                                                                                                                                                                                                                                                                                                                                                                                                                                                                                                                                                                                                                                                                     | <b>Category of Text-Negative Guidelines &amp; Data Used to Categorize Guideline (Where Applicable)</b> |
|---------------------------------------------------------------------------------------------------------------------------------------------------------------------------------------------------------------------------------------|-------------------------------------------------------------------------------------------------------------------------------------------------------------------------------------------------------------------------------------------------------------------------------------------------------------------------------------------------------------------------------------------------------------------------------------------------------------------------------------------------------------------------------------------|----------------------------------------|------------------------------------------------------------------------------------------------------------------------------------------------------------------------------------------------------------------------------------------------------------------------------------------------------------------------------------------------------------------------------------------------------------------------------------------------------------------------------------------------------------------------------------------------------------------------------------------------------------------------------------------------------------------------------------------------------------------------------------------------------------------------------------------------------------------------------------------------------------------------------------------------------------------------------------------------------------------------------------------------------------|--------------------------------------------------------------------------------------------------------|
| <p>The Management of Concussion/mTBI Working Group. (2016). VA/DoD CPG for management of concussion/mTBI.</p> <p>United States</p> <p>Peer-reviewed literature</p>                                                                    | <p>Management at primary and specialty VA/DoD clinical settings <math>\geq 7</math> days after initial head injury (not management of acute phase <math>&lt; 7</math> days)</p> <p>Operation Enduring Freedom and Operation Iraqi Freedom service men and women (<math>&gt; 18</math> yrs) diagnosed w/mTBI (deployed and non-deployed active duty Service Members, and National Guard and Reserve components)</p> <p>HCPs providing or directing tx services in any VA/DoD healthcare settings, including primary and specialty care</p> | Text-Positive                          | <p>Category 2</p> <p>- Recommendation 7: "In ax of patients w/persistent sxs, focus should be given to other factors including psychiatric, psychosocial support, and compensation/ litigation issues and a comprehensive psychosocial evaluation should be obtained, to include:</p> <ol style="list-style-type: none"> <li>Support systems (e.g., family, vocational)</li> <li>Mental health history for pre-morbid conditions</li> <li>Co-occurring conditions(e.g., chronic pain, mood disorders, stress disorder, personality disorder)</li> <li>Substance use disorder(e.g., alcohol, prescription misuse, illicit drugs, caffeine)</li> <li>Secondary gain issues (e.g., compensation, litigation)</li> <li>Unemployment or/changein job status</li> <li>other issues (e.g., financial/housing/legal)"</li> </ol> <p>"Table C-1. Functional Assessment:<br/>- Housing – does the patient have adequate housing? Are there appropriate utilities and services? Is the housing situation stable?"</p> | N/A                                                                                                    |
| <p>Trevena et al. (2004). CPG for the care of people living w/TBI in the community.</p> <p>Australia</p> <p>Grey Literature</p>                                                                                                       | <p>Management (long-term care, including frequency, dx, tx and prognosis of common problems in TBI patients)</p> <p>Adults w/TBI from road traffic accidents (severity not specified)</p> <p>GP and patients presenting to GP for care who have been hospitalized for TBI as a result of road traffic accident</p>                                                                                                                                                                                                                        | Text-Negative                          | N/A                                                                                                                                                                                                                                                                                                                                                                                                                                                                                                                                                                                                                                                                                                                                                                                                                                                                                                                                                                                                        | Category 2                                                                                             |
| <p>Uden et al. (2013). Scandinavian guidelines for initial management of minimal, mild and moderate headinjuries in adults: An evidence and consensus-based update.</p> <p>Scandinavian Countries</p> <p>Peer-reviewed literature</p> | <p>Acute management (w/in first 24 hrs)</p> <p>Adults (<math>\geq 18</math> yrs) w/minimal, mild, and moderate TBI</p> <p>ED physicians</p>                                                                                                                                                                                                                                                                                                                                                                                               | Text-Negative                          | N/A                                                                                                                                                                                                                                                                                                                                                                                                                                                                                                                                                                                                                                                                                                                                                                                                                                                                                                                                                                                                        | Category 2                                                                                             |

| <b>Author(s). Year. Guideline Name</b><br><br><b>Country</b><br><br><b>Source</b>                                                                                                                      | <b>Focus of the Guideline</b><br><br><b>Target Population of the Guideline</b><br><br><b>Target Audience of Guideline</b>                                                                                                                                                                                                | <b>Text-Positive vs. Text-Negative</b> | <b>Category of Text-Positive Guidelines &amp; Data Used to Categorize Guideline (Where Applicable)</b> | <b>Category of Text-Negative Guidelines &amp; Data Used to Categorize Guideline (Where Applicable)</b> |
|--------------------------------------------------------------------------------------------------------------------------------------------------------------------------------------------------------|--------------------------------------------------------------------------------------------------------------------------------------------------------------------------------------------------------------------------------------------------------------------------------------------------------------------------|----------------------------------------|--------------------------------------------------------------------------------------------------------|--------------------------------------------------------------------------------------------------------|
| Vavilala et al. (2021). Severe TBI in children: Initial evaluation and management.<br><br>United States<br><br>Grey Literature                                                                         | Evaluation and management<br><br>Children w/severe TBI<br><br>HCPs                                                                                                                                                                                                                                                       | Text-Negative                          | N/A                                                                                                    | Category 2                                                                                             |
| Vos et al. (2012). mTBI.<br><br>Europe<br><br>Peer-reviewed literature                                                                                                                                 | Initial management<br><br>Persons w/mTBI (adults and children)<br><br>HCPs                                                                                                                                                                                                                                               | Text-Negative                          | N/A                                                                                                    | Category 2                                                                                             |
| Warden et al. (2006).<br>Guidelines for the pharmacologic tx of neurobehavioural sequelae of TBI.<br><br>United States<br><br>Peer-reviewed literature                                                 | Pharmacologic management<br><br>Persons w/TBI (age not specified)<br><br>HCPs (inferred)                                                                                                                                                                                                                                 | Text-Negative                          | N/A                                                                                                    | Category 2                                                                                             |
| West et al. (2011). Care of the patient w/ mTBI, American Association of Neuroscience Nurses and Association of Rehabilitation Nurses CPG series.<br><br>United States<br><br>Peer-reviewed literature | Management of patients w/mTBI (both acute and rehabilitation)<br><br>Persons w/mTBI (not age specific)<br><br>Nurses                                                                                                                                                                                                     | Text-Negative                          | N/A                                                                                                    | Category 2                                                                                             |
| Wheeler et al. (2016). Occupational therapy practice guidelines for adults w/TBI.<br><br>United States<br><br>References of Included CPG                                                               | Counseling, management, rehabilitation, tx<br><br>Adults w/TBI (age not specified)<br><br>HCPs, including Advanced Practice Nurses, Nurses, Occupational Therapists, Physical Therapists, Physician Assistants, Physicians, Psychologists/Non-physician Behavioral Health, Clinicians, SWs, Speech-Language Pathologists | Text-Negative                          | N/A                                                                                                    | Category 2                                                                                             |
| Wintermark et al. (2015). Imaging evidence and recommendations for TBI: Advanced neuro- and neurovascular imaging techniques.<br><br>United States<br><br>References of Included CPG                   | Dx/clinical imaging of acute, subacute, and chronic TBI<br><br>Persons w/TBI, all severity<br><br>HCPs, referring physicians, radiologists                                                                                                                                                                               | Text-Negative                          | N/A                                                                                                    | Category 2                                                                                             |
| Wintermark et al. (2015). Imaging evidence and recommendations for TBI: Conventional neuroimaging techniques.<br><br>United States<br><br>References of Included CPG                                   | Dx/clinical imaging<br><br>Persons w/TBI<br><br>HCPs (inferred)                                                                                                                                                                                                                                                          | Text-Negative                          | N/A                                                                                                    | Category 2                                                                                             |



| Author(s). Year. Guideline Name<br>Country<br>Source                                                                        | Focus of the Guideline<br>Target Population of the Guideline<br>Target Audience of Guideline | Text-Positive vs. Text-Negative | Category of Text-Positive Guidelines & Data Used to Categorize Guideline (Where Applicable) | Category of Text-Negative Guidelines & Data Used to Categorize Guideline (Where Applicable) |
|-----------------------------------------------------------------------------------------------------------------------------|----------------------------------------------------------------------------------------------|---------------------------------|---------------------------------------------------------------------------------------------|---------------------------------------------------------------------------------------------|
| Workplace Safety and Insurance Board (WSIB). (2012). mTBI. Program of Care.<br><br>Canada<br><br>References of Included CPG | Management of sxs<br><br>Workers w/mTBI for up to 6 mos of care<br><br>HCPs                  | Text-Negative                   | N/A                                                                                         | Category 2                                                                                  |

**Table 2a. Data Extraction for Clinical Practice Guidelines for Homelessness**

**Definitions**

|                                             |                                                                                                                                                                                                                                                                                                                                                                                                                                                                                                       |
|---------------------------------------------|-------------------------------------------------------------------------------------------------------------------------------------------------------------------------------------------------------------------------------------------------------------------------------------------------------------------------------------------------------------------------------------------------------------------------------------------------------------------------------------------------------|
| <b>Text-Positive vs. Text-Negative</b>      | <ul style="list-style-type: none"> <li>Text-Positive = Contain <math>\geq 1</math> keyword for/content consistent with TBI in text</li> <li>Text-Negative = Do not contain any keyword for/content consistent with TBI in text</li> </ul>                                                                                                                                                                                                                                                             |
| <b>Category of Text-Positive Guidelines</b> | <ul style="list-style-type: none"> <li>Category 1 = Guideline specifically recommends evidence-based diagnostic, management, or treatment approaches for individuals with TBI</li> <li>Category 2 = Guideline acknowledges or makes reference to data (e.g., epidemiologic, risk factors, outcome) regarding individuals with TBI only, without recommendations</li> <li>Category 3 = Guideline mentions individuals with TBI without context related to the literature or recommendations</li> </ul> |
| <b>Category of Text-Negative Guidelines</b> | <ul style="list-style-type: none"> <li>Category 1 = Reference lists contain articles that include keywords for TBI, but the text of the guideline does not contain any keywords for/content consistent with the definition of TBI</li> <li>Category 2 = No article in the reference list includes keywords for TBI</li> </ul>                                                                                                                                                                         |

| Author(s). Year. Guideline Name.<br>Country<br>Source                                                                                                                                          | Focus of the Guideline<br>Target Population of the Guideline<br>Target Audience of Guideline                                                                                                                                                                                                                             | Text-Positive vs. Text-Negative | Category of Text-Positive Guidelines & Data Used to Categorize Guideline (Where Applicable)                                                                                                                                                                                                                                                                                                                                                                                                                                                                                                                                                                                                                                                                                                                                                                                                                                                                                                                                                 | Category of Text-Negative Guidelines & Data Used to Categorize Guideline (Where Applicable) |
|------------------------------------------------------------------------------------------------------------------------------------------------------------------------------------------------|--------------------------------------------------------------------------------------------------------------------------------------------------------------------------------------------------------------------------------------------------------------------------------------------------------------------------|---------------------------------|---------------------------------------------------------------------------------------------------------------------------------------------------------------------------------------------------------------------------------------------------------------------------------------------------------------------------------------------------------------------------------------------------------------------------------------------------------------------------------------------------------------------------------------------------------------------------------------------------------------------------------------------------------------------------------------------------------------------------------------------------------------------------------------------------------------------------------------------------------------------------------------------------------------------------------------------------------------------------------------------------------------------------------------------|---------------------------------------------------------------------------------------------|
| National Institute for Health and Clinical Excellence. (2022). Integrated health and social care for people experiencing homelessness.<br><br>United Kingdom<br><br>References of included CPG | Integrated health and social care services<br><br>$\geq 16$ yrs w/homelessness<br><br>Local authorities, commissioners and providers of services, healthcare practitioners in primary, secondary and tertiary care, social care practitioners, people who experience homelessness, their families, advocates, and public | Text-Positive                   | Category 2<br><br>"Experience of psychological trauma and adverse childhood events are common in people experiencing homelessness, and the prevalence of people who are neuroatypical or have a brain injury is higher than in the general population."<br><br>"The committee agreed that this could include some migrants and people w/learning disabilities or ABI; emphasised the need to tailor communication and information provision to people's needs and preferences, considering a wide range of possible speech, language and communication difficulties."<br><br>"The level of support depends on the person's needs, w/some people needing specialist onsite support. These could be people w/high levels of need or severe and multiple disadvantage who are vulnerable to abuse and exploitation, young people who have no experience of independent living, people who have experienced domestic abuse, or people w/particular care needs who need support in everyday life because of premature aging, ABI or disability." | N/A                                                                                         |

|                                                                                                                                                                                                                                              |                                                                                                                                                                                                                                                   |                      |                                                                                                                                                                                                                            |            |
|----------------------------------------------------------------------------------------------------------------------------------------------------------------------------------------------------------------------------------------------|---------------------------------------------------------------------------------------------------------------------------------------------------------------------------------------------------------------------------------------------------|----------------------|----------------------------------------------------------------------------------------------------------------------------------------------------------------------------------------------------------------------------|------------|
| <p>Pottie et al. (2020). Clinical guideline for homeless and vulnerably housed people, and people w/lived homelessness experience.</p> <p>Canada</p> <p>Peer-reviewed literature<br/>Author(s). Year. Guideline Name.<br/>Country Source</p> | <p>Social and health management (upstream interventions) and health-related consequences (downstream interventions)</p> <p>Homeless and vulnerably housed populations</p> <p>HCPs, policy makers, public health practitioners and researchers</p> | <p>Text-Positive</p> | <p>Category 2</p> <p>"The priority marginalized populations identified included Indigenous people; women and families; youth; people w/ABI, or intellectual or physical disabilities; and refugees and other migrants"</p> | <p>N/A</p> |
|----------------------------------------------------------------------------------------------------------------------------------------------------------------------------------------------------------------------------------------------|---------------------------------------------------------------------------------------------------------------------------------------------------------------------------------------------------------------------------------------------------|----------------------|----------------------------------------------------------------------------------------------------------------------------------------------------------------------------------------------------------------------------|------------|

ABI: Acquired Brain Injury; Ax: Assessment; CDC: Centers for Disease Control and Prevention; CPG: Clinical practice guideline; DoD: Department of Defense; dx: diagnosis; ED: Emergency Department; GP: General Practitioner; HCPs: Health care professionals; hrs: hours; ICU: Intensive Care Unit; mos: months; mTBI: mild traumatic brain injury; ONF: Ontario Neurotrauma Foundation; OTs: Occupational therapist; PTs: Physiotherapist; SWs: Social Workers; sxs: symptoms; TBI: Traumatic Brain Injury; tx: treatment; VA: Veteran Affairs; w/: with; w/in: within; yr(s): year(s)

## Supplementary File 4. Quality Appraisal

| Evaluation Tools and Items                                                                                                                                                                                                      | Alali et al. (2017). Beta-blockers and Traumatic Brain Injury A systematic review, Meta-analysis, and Easter Association for the Surgery of Trauma Guideline | American College of Emergency Physicians (2023). Clinical policy: Critical issues in the management of adult patients presenting to the emergency department with mild traumatic brain injury | Astrand et al., (2016). Scandinavian guidelines for initial management of minor and moderate head trauma in children | Badjatia (2008). Guidelines for prehospital management of TBI 2nd edition | Bayley et al. (2023). INCOG guidelines for cognitive rehabilitation following traumatic brain injury | West et al. (2011). Care of the patient w/ mTBI, American Association of Neuroscience Nurses and Association of Rehabilitation Nurses CPG series. | Broglio et al. National athletic trainers' association position statement: Management of sport | Carney et al. (2017). Guidelines for the Management of Severe Traumatic Brain Injury 4th Edition |
|---------------------------------------------------------------------------------------------------------------------------------------------------------------------------------------------------------------------------------|--------------------------------------------------------------------------------------------------------------------------------------------------------------|-----------------------------------------------------------------------------------------------------------------------------------------------------------------------------------------------|----------------------------------------------------------------------------------------------------------------------|---------------------------------------------------------------------------|------------------------------------------------------------------------------------------------------|---------------------------------------------------------------------------------------------------------------------------------------------------|------------------------------------------------------------------------------------------------|--------------------------------------------------------------------------------------------------|
| <b>Assessing Equity in Clinical Practice Guidelines (Dans et al., 2007)</b>                                                                                                                                                     |                                                                                                                                                              |                                                                                                                                                                                               |                                                                                                                      |                                                                           |                                                                                                      |                                                                                                                                                   |                                                                                                |                                                                                                  |
| 1. Discusses the burden of disease in disadvantaged Populations                                                                                                                                                                 | no                                                                                                                                                           | yes                                                                                                                                                                                           | no                                                                                                                   | no                                                                        | no                                                                                                   | no                                                                                                                                                | no                                                                                             | no                                                                                               |
| 2. Discusses differences between disadvantaged and privileged populations, in terms of the biology of the disease, adherence, and baseline risks                                                                                | no                                                                                                                                                           | yes                                                                                                                                                                                           | no                                                                                                                   | no                                                                        | no                                                                                                   | no                                                                                                                                                | no                                                                                             | no                                                                                               |
| 3. Values [of the intervention/outcome] assessed in guideline development panels through consultations with disadvantaged populations, involvement of their caregivers, reference to relevant search, or transparent reflection | no                                                                                                                                                           | no                                                                                                                                                                                            | no                                                                                                                   | no                                                                        | no                                                                                                   | no                                                                                                                                                | no                                                                                             | no                                                                                               |
| 4. Discusses barriers to implementation in disadvantaged populations, and identifies strategies to overcome these barriers                                                                                                      | no                                                                                                                                                           | no                                                                                                                                                                                            | no                                                                                                                   | no                                                                        | yes                                                                                                  | no                                                                                                                                                | no                                                                                             | no                                                                                               |
| 5. Plans for monitoring disadvantaged groups according to PROGRESS-plus elements                                                                                                                                                | no                                                                                                                                                           | yes                                                                                                                                                                                           | no                                                                                                                   | no                                                                        | yes                                                                                                  | no                                                                                                                                                | no                                                                                             | no                                                                                               |
| <b>GRADE Equity Guideline: Equity Extension of the Guideline Development (Akl et al., 2017)</b>                                                                                                                                 |                                                                                                                                                              |                                                                                                                                                                                               |                                                                                                                      |                                                                           |                                                                                                      |                                                                                                                                                   |                                                                                                |                                                                                                  |
| 1. Setting priorities<br>a. Dedicates part of or entire guideline to the care of disadvantaged populations                                                                                                                      | no                                                                                                                                                           | no                                                                                                                                                                                            | no                                                                                                                   | no                                                                        | no                                                                                                   | no                                                                                                                                                | no                                                                                             | no                                                                                               |
| 2. Guideline group membership<br>a. Includes representatives of the disadvantaged populations in the different guideline groups, particularly the voting panel                                                                  | no                                                                                                                                                           | no                                                                                                                                                                                            | no                                                                                                                   | no                                                                        | no                                                                                                   | no                                                                                                                                                | not reported                                                                                   | no                                                                                               |
| <b>Response Options:</b> Yes, No, Not Reported, or N/A (Not Applicable)                                                                                                                                                         |                                                                                                                                                              |                                                                                                                                                                                               |                                                                                                                      |                                                                           |                                                                                                      |                                                                                                                                                   |                                                                                                |                                                                                                  |

| Evaluation Tools and Items                                                                                                                                                                                            | Alali et al. (2017). Beta-blockers and Traumatic Brain Injury A systematic review, Meta-analysis, and Easter Association for the Surgery of Trauma Guideline | American College of Emergency Physicians (2023). Clinical policy: Critical issues in the management of adult patients presenting to the emergency department with mild traumatic brain injury | Astrand et al., (2016). Scandinavian guidelines for initial management of minor and moderate head trauma in children | Badjatia (2008). Guidelines for prehospital management of TBI 2nd edition | Bayley et al. (2023). INCOG guidelines for cognitive rehabilitation following traumatic brain injury | West et al. (2011). Care of the patient w/ mTBI, American Association of Neuroscience Nurses and Association of Rehabilitation Nurses CPG series. | Broglio et al. National athletic trainers' association position statement: Management of sport | Carney et al. (2017). Guidelines for the Management of Severe Traumatic Brain Injury 4th Edition |
|-----------------------------------------------------------------------------------------------------------------------------------------------------------------------------------------------------------------------|--------------------------------------------------------------------------------------------------------------------------------------------------------------|-----------------------------------------------------------------------------------------------------------------------------------------------------------------------------------------------|----------------------------------------------------------------------------------------------------------------------|---------------------------------------------------------------------------|------------------------------------------------------------------------------------------------------|---------------------------------------------------------------------------------------------------------------------------------------------------|------------------------------------------------------------------------------------------------|--------------------------------------------------------------------------------------------------|
| b. Ensures the method for recruitment of group members considers representatives of all relevant disadvantaged populations                                                                                            | not reported                                                                                                                                                 | not reported                                                                                                                                                                                  | no                                                                                                                   | not reported                                                              | no                                                                                                   | no                                                                                                                                                | not reported                                                                                   | not reported                                                                                     |
| c. Recruits a methodologist who is familiar with and mindful of equity issues                                                                                                                                         | not reported                                                                                                                                                 | not reported                                                                                                                                                                                  | not reported                                                                                                         | not reported                                                              | not reported                                                                                         | no                                                                                                                                                | not reported                                                                                   | not reported                                                                                     |
| d. Ensures the chair of the voting panel is familiar with equity issues                                                                                                                                               | not reported                                                                                                                                                 | not reported                                                                                                                                                                                  | not reported                                                                                                         | not reported                                                              | not reported                                                                                         | no                                                                                                                                                | not reported                                                                                   | not reported                                                                                     |
| 3. Identifying the target audience(s)                                                                                                                                                                                 |                                                                                                                                                              |                                                                                                                                                                                               |                                                                                                                      |                                                                           |                                                                                                      | no                                                                                                                                                |                                                                                                | no                                                                                               |
| a. Specifies relevant disadvantaged populations when identifying the target audience(s)                                                                                                                               | no                                                                                                                                                           | no                                                                                                                                                                                            | no                                                                                                                   | no                                                                        | no                                                                                                   | no                                                                                                                                                | no                                                                                             | no                                                                                               |
| b. Involves representatives of the disadvantaged populations when identifying the target audience(s)                                                                                                                  | no                                                                                                                                                           | not reported                                                                                                                                                                                  | no                                                                                                                   | no                                                                        | no                                                                                                   | no                                                                                                                                                | no                                                                                             | no                                                                                               |
| 4. Generating the guideline questions                                                                                                                                                                                 |                                                                                                                                                              |                                                                                                                                                                                               |                                                                                                                      |                                                                           |                                                                                                      |                                                                                                                                                   |                                                                                                |                                                                                                  |
| a. Considers equity when specifying elements of the PICO questions                                                                                                                                                    | no                                                                                                                                                           | no                                                                                                                                                                                            | not reported                                                                                                         | no                                                                        | not reported                                                                                         | not reported                                                                                                                                      | not reported                                                                                   | no                                                                                               |
| b. Considers "good-practice statements" that could help address equity issues                                                                                                                                         | no                                                                                                                                                           | no                                                                                                                                                                                            | no                                                                                                                   | no                                                                        | no                                                                                                   | no                                                                                                                                                | no                                                                                             | no                                                                                               |
| 5. Considers the importance of outcomes and interventions                                                                                                                                                             |                                                                                                                                                              |                                                                                                                                                                                               |                                                                                                                      |                                                                           |                                                                                                      |                                                                                                                                                   |                                                                                                |                                                                                                  |
| a. Involves representatives of disadvantaged populations in rating the importance of interventions and outcomes                                                                                                       | no                                                                                                                                                           | no                                                                                                                                                                                            | no                                                                                                                   | no                                                                        | no                                                                                                   | no                                                                                                                                                | no                                                                                             | no                                                                                               |
| b. Searches selected databases for outcomes rated as important by disadvantaged populations                                                                                                                           | no                                                                                                                                                           | no                                                                                                                                                                                            | no                                                                                                                   | no                                                                        | no                                                                                                   | no                                                                                                                                                | no                                                                                             | no                                                                                               |
| c. Considers separate recommendations for disadvantaged populations if their values and preferences are thought to differ substantively to the point of affecting the strength and/or direction of the recommendation | no                                                                                                                                                           | no                                                                                                                                                                                            | no                                                                                                                   | no                                                                        | yes                                                                                                  | no                                                                                                                                                | no                                                                                             | no                                                                                               |
| <b>Response Options:</b> Yes, No, Not Reported, or N/A (Not Applicable)                                                                                                                                               |                                                                                                                                                              |                                                                                                                                                                                               |                                                                                                                      |                                                                           |                                                                                                      |                                                                                                                                                   |                                                                                                |                                                                                                  |

| Evaluation Tools and Items                                                                                                                                                                                                                                                                                                                                                                                                                                                                                                                                                                                                                                                                                                                                                                                                                                                                                                                                                                                                                                                                                                                                                                                                                                                                                                                                                                       | Alali et al. (2017). Beta-blockers and Traumatic Brain Injury A systematic review, Meta-analysis, and Easter Association for the Surgery of Trauma Guideline | American College of Emergency Physicians (2023). Clinical policy: Critical issues in the management of adult patients presenting to the emergency department with mild traumatic brain injury | Astrand et al., (2016). Scandinavian guidelines for initial management of minor and moderate head trauma in children | Badjatia (2008). Guidelines for prehospital management of TBI 2nd edition | Bayley et al. (2023). INCOG guidelines for cognitive rehabilitation following traumatic brain injury | West et al. (2011). Care of the patient w/ mTBI, American Association of Neuroscience Nurses and Association of Rehabilitation Nurses CPG series. | Broglia et al. National athletic trainers' association position statement: Management of sport | Carney et al. (2017). Guidelines for the Management of Severe Traumatic Brain Injury 4th Edition |
|--------------------------------------------------------------------------------------------------------------------------------------------------------------------------------------------------------------------------------------------------------------------------------------------------------------------------------------------------------------------------------------------------------------------------------------------------------------------------------------------------------------------------------------------------------------------------------------------------------------------------------------------------------------------------------------------------------------------------------------------------------------------------------------------------------------------------------------------------------------------------------------------------------------------------------------------------------------------------------------------------------------------------------------------------------------------------------------------------------------------------------------------------------------------------------------------------------------------------------------------------------------------------------------------------------------------------------------------------------------------------------------------------|--------------------------------------------------------------------------------------------------------------------------------------------------------------|-----------------------------------------------------------------------------------------------------------------------------------------------------------------------------------------------|----------------------------------------------------------------------------------------------------------------------|---------------------------------------------------------------------------|------------------------------------------------------------------------------------------------------|---------------------------------------------------------------------------------------------------------------------------------------------------|------------------------------------------------------------------------------------------------|--------------------------------------------------------------------------------------------------|
| <p>6. Deciding what evidence to include and searching for evidence</p> <p>a. Seeks evidence specific to disadvantaged populations, for example, baseline risks specific to those groups</p> <p>b. Considers including evidence derived from fields other than health (e.g., social science) that address disadvantaged populations</p> <p>c. Searches literature published in the language relevant to the disadvantaged population</p> <p>7. Summarizing the evidence and considering additional information</p> <p>a. Considers the PROGRESS-plus elements when synthesizing the evidence</p> <p>b. Follows the PRISMA-equity statement when reporting the systematic reviews</p> <p>c. Considers information on resource use, cost, effect on equity, feasibility, and acceptability from the perspective of disadvantaged populations</p> <p>8. Wording of recommendations</p> <p>a. Specific in defining the population to maximize the understanding that it applies to a disadvantaged population (when applicable)</p> <p>b. Includes the necessary remarks following the recommendation to ensure its appropriate implementation in disadvantaged populations</p> <p>c. Ensures that the language is used carefully so that the recommendation does not stigmatize already disadvantaged populations</p> <p><b>Response Options:</b> Yes, No, Not Reported, or N/A (Not Applicable)</p> | no                                                                                                                                                           | no                                                                                                                                                                                            | no                                                                                                                   | no                                                                        | no                                                                                                   | no                                                                                                                                                | no                                                                                             | no                                                                                               |
| b. Considers including evidence derived from fields other than health (e.g., social science) that address disadvantaged populations                                                                                                                                                                                                                                                                                                                                                                                                                                                                                                                                                                                                                                                                                                                                                                                                                                                                                                                                                                                                                                                                                                                                                                                                                                                              | no                                                                                                                                                           | no                                                                                                                                                                                            | no                                                                                                                   | no                                                                        | no                                                                                                   | no                                                                                                                                                | no                                                                                             | no                                                                                               |
| c. Searches literature published in the language relevant to the disadvantaged population                                                                                                                                                                                                                                                                                                                                                                                                                                                                                                                                                                                                                                                                                                                                                                                                                                                                                                                                                                                                                                                                                                                                                                                                                                                                                                        | n/a                                                                                                                                                          | no                                                                                                                                                                                            | n/a                                                                                                                  | n/a                                                                       | no                                                                                                   | n/a                                                                                                                                               | n/a                                                                                            | n/a                                                                                              |
| a. Considers the PROGRESS-plus elements when synthesizing the evidence                                                                                                                                                                                                                                                                                                                                                                                                                                                                                                                                                                                                                                                                                                                                                                                                                                                                                                                                                                                                                                                                                                                                                                                                                                                                                                                           | no                                                                                                                                                           | yes                                                                                                                                                                                           | no                                                                                                                   | no                                                                        | yes                                                                                                  | no                                                                                                                                                | yes                                                                                            | yes                                                                                              |
| b. Follows the PRISMA-equity statement when reporting the systematic reviews                                                                                                                                                                                                                                                                                                                                                                                                                                                                                                                                                                                                                                                                                                                                                                                                                                                                                                                                                                                                                                                                                                                                                                                                                                                                                                                     | no                                                                                                                                                           | no                                                                                                                                                                                            | no                                                                                                                   | no                                                                        | no                                                                                                   | no                                                                                                                                                | no                                                                                             | no                                                                                               |
| c. Considers information on resource use, cost, effect on equity, feasibility, and acceptability from the perspective of disadvantaged populations                                                                                                                                                                                                                                                                                                                                                                                                                                                                                                                                                                                                                                                                                                                                                                                                                                                                                                                                                                                                                                                                                                                                                                                                                                               | no                                                                                                                                                           | no                                                                                                                                                                                            | no                                                                                                                   | no                                                                        | yes                                                                                                  | no                                                                                                                                                | no                                                                                             | yes                                                                                              |
| a. Specific in defining the population to maximize the understanding that it applies to a disadvantaged population (when applicable)                                                                                                                                                                                                                                                                                                                                                                                                                                                                                                                                                                                                                                                                                                                                                                                                                                                                                                                                                                                                                                                                                                                                                                                                                                                             | n/a                                                                                                                                                          | n/a                                                                                                                                                                                           | n/a                                                                                                                  | n/a                                                                       | no                                                                                                   | n/a                                                                                                                                               | n/a                                                                                            | n/a                                                                                              |
| b. Includes the necessary remarks following the recommendation to ensure its appropriate implementation in disadvantaged populations                                                                                                                                                                                                                                                                                                                                                                                                                                                                                                                                                                                                                                                                                                                                                                                                                                                                                                                                                                                                                                                                                                                                                                                                                                                             | n/a                                                                                                                                                          | n/a                                                                                                                                                                                           | n/a                                                                                                                  | n/a                                                                       | no                                                                                                   | n/a                                                                                                                                               | n/a                                                                                            | n/a                                                                                              |
| c. Ensures that the language is used carefully so that the recommendation does not stigmatize already disadvantaged populations                                                                                                                                                                                                                                                                                                                                                                                                                                                                                                                                                                                                                                                                                                                                                                                                                                                                                                                                                                                                                                                                                                                                                                                                                                                                  | n/a                                                                                                                                                          | n/a                                                                                                                                                                                           | n/a                                                                                                                  | n/a                                                                       | no                                                                                                   | n/a                                                                                                                                               | n/a                                                                                            | n/a                                                                                              |

| <p style="text-align: center;"><b>Evaluation Tools and Items</b></p>                                                    | <p>Alali et al. (2017). Beta-blockers and Traumatic Brain Injury A systematic review, Meta-analysis, and Easter Association for the Surgery of Trauma Guideline</p> | <p>American College of Emergency Physicians (2023). Clinical policy: Critical issues in the management of adult patients presenting to the emergency department with mild traumatic brain injury</p> | <p>Astrand et al., (2016). Scandinavian guidelines for initial management of minor and moderate head trauma in children</p> | <p>Badjatia (2008). Guidelines for prehospital management of TBI 2nd edition</p> | <p>Bayley et al. (2023). INCOG guidelines for cognitive rehabilitation following traumatic brain injury</p> | <p>West et al. (2011). Care of the patient w/ mTBI, American Association of Neuroscience Nurses and Association of Rehabilitation Nurses CPG series.</p> | <p>Broglio et al. National athletic trainers' association position statement: Management of sport</p> | <p>Carney et al. (2017). Guidelines for the Management of Severe Traumatic Brain Injury 4th Edition</p> |
|-------------------------------------------------------------------------------------------------------------------------|---------------------------------------------------------------------------------------------------------------------------------------------------------------------|------------------------------------------------------------------------------------------------------------------------------------------------------------------------------------------------------|-----------------------------------------------------------------------------------------------------------------------------|----------------------------------------------------------------------------------|-------------------------------------------------------------------------------------------------------------|----------------------------------------------------------------------------------------------------------------------------------------------------------|-------------------------------------------------------------------------------------------------------|---------------------------------------------------------------------------------------------------------|
| <p>9. Evaluation and use<br/>a. Produces tools to facilitate implementation and use among disadvantaged populations</p> | <p style="text-align: center;">no</p>                                                                                                                               | <p style="text-align: center;">no</p>                                                                                                                                                                | <p style="text-align: center;">no</p>                                                                                       | <p style="text-align: center;">no</p>                                            | <p style="text-align: center;">no</p>                                                                       | <p style="text-align: center;">no</p>                                                                                                                    | <p style="text-align: center;">no</p>                                                                 | <p style="text-align: center;">no</p>                                                                   |
| <p>b. Monitors and audits implementation and use among disadvantaged populations</p>                                    | <p style="text-align: center;">no</p>                                                                                                                               | <p style="text-align: center;">no</p>                                                                                                                                                                | <p style="text-align: center;">no</p>                                                                                       | <p style="text-align: center;">no</p>                                            | <p style="text-align: center;">no</p>                                                                       | <p style="text-align: center;">no</p>                                                                                                                    | <p style="text-align: center;">no</p>                                                                 | <p style="text-align: center;">no</p>                                                                   |
| <p><b>Response Options:</b> Yes, No, Not Reported, or N/A (Not Applicable)</p>                                          |                                                                                                                                                                     |                                                                                                                                                                                                      |                                                                                                                             |                                                                                  |                                                                                                             |                                                                                                                                                          |                                                                                                       |                                                                                                         |

| <p style="text-align: center;"><b>Evaluation Tools and Items</b></p>                                                                                                                                                                   | <p style="text-align: center;">Da Dalt et al. 2018. Italian guidelines on the assessment and management of pediatric head injury in the emergency department</p> | <p style="text-align: center;">De Matteo et al. 2020. Concussion management for children has changed: New pediatric protocols using the latest evidence</p> | <p style="text-align: center;">French Language Resuscitation Society. (2000). Management of crainal injuries early-phase bass</p> | <p style="text-align: center;">Geeraerts et al. (2018). Management of severe traumatic brain injury (first 24 hours)</p> | <p style="text-align: center;">Harmon et al. (2018). American medical society for sports medicine poistion statement: Concussion in sport</p> | <p style="text-align: center;">INESSS and ONF. (2016). CPG for the rehabilitation of adults w/moderate to severe TBI</p> | <p style="text-align: center;">Kennedy et al. (2008). Intervention for executive functions after traumatic brain injury - A systematic review, meta-analysis, and clinical recommendations</p> |
|----------------------------------------------------------------------------------------------------------------------------------------------------------------------------------------------------------------------------------------|------------------------------------------------------------------------------------------------------------------------------------------------------------------|-------------------------------------------------------------------------------------------------------------------------------------------------------------|-----------------------------------------------------------------------------------------------------------------------------------|--------------------------------------------------------------------------------------------------------------------------|-----------------------------------------------------------------------------------------------------------------------------------------------|--------------------------------------------------------------------------------------------------------------------------|------------------------------------------------------------------------------------------------------------------------------------------------------------------------------------------------|
| <p><b>Assessing Equity in Clinical Practice Guidelines (Dans et al., 2007)</b></p>                                                                                                                                                     |                                                                                                                                                                  |                                                                                                                                                             |                                                                                                                                   |                                                                                                                          |                                                                                                                                               |                                                                                                                          |                                                                                                                                                                                                |
| <p>1. Discusses the burden of disease in disadvantaged Populations</p>                                                                                                                                                                 | no                                                                                                                                                               | no                                                                                                                                                          | no                                                                                                                                | no                                                                                                                       | no                                                                                                                                            | no                                                                                                                       | no                                                                                                                                                                                             |
| <p>2. Discusses differences between disadvantaged and privileged populations, in terms of the biology of the disease, adherence, and baseline risks</p>                                                                                | no                                                                                                                                                               | no                                                                                                                                                          | no                                                                                                                                | no                                                                                                                       | no                                                                                                                                            | no                                                                                                                       | no                                                                                                                                                                                             |
| <p>3. Values [of the intervention/outcome] assessed in guideline development panels through consultations with disadvantaged populations, involvement of their caregivers, reference to relevant search, or transparent reflection</p> | no                                                                                                                                                               | no                                                                                                                                                          | no                                                                                                                                | no                                                                                                                       | no                                                                                                                                            | no                                                                                                                       | no                                                                                                                                                                                             |
| <p>4. Discusses barriers to implementation in disadvantaged populations, and identifies strategies to overcome these barriers</p>                                                                                                      | yes                                                                                                                                                              | no                                                                                                                                                          | no                                                                                                                                | no                                                                                                                       | no                                                                                                                                            | no                                                                                                                       | no                                                                                                                                                                                             |
| <p>5. Plans for monitoring disadvantaged groups according to PROGRESS-plus elements</p>                                                                                                                                                | no                                                                                                                                                               | no                                                                                                                                                          | no                                                                                                                                | no                                                                                                                       | no                                                                                                                                            | no                                                                                                                       | no                                                                                                                                                                                             |
| <p><b>GRADE Equity Guideline: Equity Extension of the Guideline Development (Akl et al., 2017)</b></p>                                                                                                                                 |                                                                                                                                                                  |                                                                                                                                                             |                                                                                                                                   |                                                                                                                          |                                                                                                                                               |                                                                                                                          |                                                                                                                                                                                                |
| <p>1. Setting priorities</p>                                                                                                                                                                                                           |                                                                                                                                                                  |                                                                                                                                                             |                                                                                                                                   |                                                                                                                          |                                                                                                                                               |                                                                                                                          |                                                                                                                                                                                                |
| <p>a. Dedicates part of or entire guideline to the care of disadvantaged populations</p>                                                                                                                                               | no                                                                                                                                                               | no                                                                                                                                                          | no                                                                                                                                | no                                                                                                                       | no                                                                                                                                            | no                                                                                                                       | no                                                                                                                                                                                             |
| <p>2. Guideline group membership</p>                                                                                                                                                                                                   |                                                                                                                                                                  |                                                                                                                                                             |                                                                                                                                   |                                                                                                                          |                                                                                                                                               |                                                                                                                          |                                                                                                                                                                                                |
| <p>a. Includes representatives of the disadvantaged populations in the different guideline groups, particularly the voting panel</p>                                                                                                   | no                                                                                                                                                               | no                                                                                                                                                          | no                                                                                                                                | no                                                                                                                       | no                                                                                                                                            | no                                                                                                                       | not reported                                                                                                                                                                                   |
| <p><b>Response Options:</b> Yes, No, Not Reported, or N/A (Not Applicable)</p>                                                                                                                                                         |                                                                                                                                                                  |                                                                                                                                                             |                                                                                                                                   |                                                                                                                          |                                                                                                                                               |                                                                                                                          |                                                                                                                                                                                                |

| Evaluation Tools and Items                                                                                                                                                                                            | Da Dalt et al. 2018. Italian guidelines on the assessment and management of pediatric head injury in the emergency department | De Matteo et al. 2020. Concussion management for children has changed: New pediatric protocols using the latest evidence | French Language Resuscitation Society. (2000). Management of crainal injuries early-phase bass | Geeraerts et al. (2018). Management of severe traumatic brain injury (first 24 hours) | Harmon et al. (2018). American medical society for sports medicine poistion statement: Concussion in sport | INESSS and ONF. (2016). CPG for the rehabilitation of adults w/moderate to severe TBI | Kennedy et al. (2008). Intervention for executive functions after traumatic brain injury - A systematic review, meta-analysis, and clinical recommendations |
|-----------------------------------------------------------------------------------------------------------------------------------------------------------------------------------------------------------------------|-------------------------------------------------------------------------------------------------------------------------------|--------------------------------------------------------------------------------------------------------------------------|------------------------------------------------------------------------------------------------|---------------------------------------------------------------------------------------|------------------------------------------------------------------------------------------------------------|---------------------------------------------------------------------------------------|-------------------------------------------------------------------------------------------------------------------------------------------------------------|
| b. Ensures the method for recruitment of group members considers representatives of all relevant disadvantaged populations                                                                                            | no                                                                                                                            | not reported                                                                                                             | not reported                                                                                   | not reported                                                                          | no                                                                                                         | not reported                                                                          | not reported                                                                                                                                                |
| c. Recruits a methodologist who is familiar with and mindful of equity issues                                                                                                                                         | no                                                                                                                            | no                                                                                                                       | no                                                                                             | no                                                                                    | no                                                                                                         | no                                                                                    | not reported                                                                                                                                                |
| d. Ensures the chair of the voting panel is familiar with equity issues                                                                                                                                               | not reported                                                                                                                  | not reported                                                                                                             | not reported                                                                                   | not reported                                                                          | not reported                                                                                               | no                                                                                    | not reported                                                                                                                                                |
| 3. Identifying the target audience(s)                                                                                                                                                                                 |                                                                                                                               |                                                                                                                          |                                                                                                |                                                                                       |                                                                                                            |                                                                                       |                                                                                                                                                             |
| a. Specifies relevant disadvantaged populations when identifying the target audience(s)                                                                                                                               | no                                                                                                                            | no                                                                                                                       | no                                                                                             | no                                                                                    | no                                                                                                         | no                                                                                    | no                                                                                                                                                          |
| b. Involves representatives of the disadvantaged populations when identifying the target audience(s)                                                                                                                  | no                                                                                                                            | no                                                                                                                       | no                                                                                             | no                                                                                    | no                                                                                                         | no                                                                                    | no                                                                                                                                                          |
| 4. Generating the guideline questions                                                                                                                                                                                 |                                                                                                                               |                                                                                                                          |                                                                                                |                                                                                       |                                                                                                            |                                                                                       |                                                                                                                                                             |
| a. Considers equity when specifying elements of the PICO questions                                                                                                                                                    | not reported                                                                                                                  | not reported                                                                                                             | no                                                                                             | no                                                                                    | no no                                                                                                      | not reported                                                                          | no no                                                                                                                                                       |
| b. Considers "good-practice statements" that could help address equity issues                                                                                                                                         | no                                                                                                                            | no                                                                                                                       | no                                                                                             | no                                                                                    |                                                                                                            | no                                                                                    |                                                                                                                                                             |
| 5. Considers the importance of outcomes and interventions                                                                                                                                                             |                                                                                                                               |                                                                                                                          |                                                                                                |                                                                                       | no                                                                                                         |                                                                                       | no                                                                                                                                                          |
| a. Involves representatives of disadvantaged populations in rating the importance of interventions and outcomes                                                                                                       | no                                                                                                                            | no                                                                                                                       | no                                                                                             | no                                                                                    |                                                                                                            | no                                                                                    |                                                                                                                                                             |
| b. Searches selected databases for outcomes rated as important by disadvantaged populations                                                                                                                           | no                                                                                                                            | no                                                                                                                       | no                                                                                             | no                                                                                    | no                                                                                                         | no                                                                                    | no                                                                                                                                                          |
| c. Considers separate recommendations for disadvantaged populations if their values and preferences are thought to differ substantively to the point of affecting the strength and/or direction of the recommendation | no                                                                                                                            | no                                                                                                                       | no                                                                                             | no                                                                                    | no                                                                                                         | no                                                                                    | no                                                                                                                                                          |
| <b>Response Options:</b> Yes, No, Not Reported, or N/A (Not Applicable)                                                                                                                                               |                                                                                                                               |                                                                                                                          |                                                                                                |                                                                                       |                                                                                                            |                                                                                       |                                                                                                                                                             |





| <p align="center"><b>Evaluation Tools and Items</b></p>                                                                 | <p>Da Dalt et al. 2018. Italian guidelines on the assessment and management of pediatric head injury in the emergency department</p> | <p>De Matteo et al. 2020. Concussion management for children has changed: New pediatric protocols using the latest evidence</p> | <p>French Language Resuscitation Society. (2000). Management of crainal injuries early-phase bass</p> | <p>Geeraerts et al. (2018). Management of severe traumatic brain injury (first 24 hours)</p> | <p>Harmon et al. (2018). American medical society for sports medicine poistion statement: Concussion in sport</p> | <p>INESSS and ONF. (2016). CPG for the rehabilitation of adults w/moderate to severe TBI</p> | <p>Kennedy et al. (2008). Intervention for executive functions after traumatic brain injury - A systematic review, meta-analysis, and clinical recommendations</p> |
|-------------------------------------------------------------------------------------------------------------------------|--------------------------------------------------------------------------------------------------------------------------------------|---------------------------------------------------------------------------------------------------------------------------------|-------------------------------------------------------------------------------------------------------|----------------------------------------------------------------------------------------------|-------------------------------------------------------------------------------------------------------------------|----------------------------------------------------------------------------------------------|--------------------------------------------------------------------------------------------------------------------------------------------------------------------|
| <p>9. Evaluation and use<br/>a. Produces tools to facilitate implementation and use among disadvantaged populations</p> | no                                                                                                                                   | no                                                                                                                              | no                                                                                                    | no                                                                                           | no                                                                                                                | no                                                                                           | no                                                                                                                                                                 |
| <p>b. Monitors and audits implementation and use among disadvantaged populations</p>                                    | no                                                                                                                                   | no                                                                                                                              | no                                                                                                    | no                                                                                           | no                                                                                                                | no                                                                                           | no                                                                                                                                                                 |
| <p><b>Response Options:</b> Yes, No, Not Reported, or N/A (Not Applicable)</p>                                          |                                                                                                                                      |                                                                                                                                 |                                                                                                       |                                                                                              |                                                                                                                   |                                                                                              |                                                                                                                                                                    |

| Evaluation Tools and Items                                                                                                                                                                                                      | Kochanek et al. (2019). Guidelines for the management of pediatric severe traumatic brain injury, third edition: Update of the brain trauma foundation guidelines | Liao et al. (2009). Clinical practice guidelines in severe traumatic brain injury in Taiwan | Luauté (2016). Behavioral and affective disorders after brain injury: French guidelines | Lumba-Brown et al. (2018). Centers for Disease Control and Prevention Guideline on the Diagnosis and Management of Mild Traumatic Brain Injury Among Children | VA/Dod clinical practice guideline for management of concussion/mild traumatic brain injury (2016) | Marshall et al. (2015). Updated clinical practice guidelines for concussion/mild traumatic brain injury and persistent symptoms | Motor Accidents Authority (2008). Guidelines for mild traumatic brain injury following a closed head injury. |
|---------------------------------------------------------------------------------------------------------------------------------------------------------------------------------------------------------------------------------|-------------------------------------------------------------------------------------------------------------------------------------------------------------------|---------------------------------------------------------------------------------------------|-----------------------------------------------------------------------------------------|---------------------------------------------------------------------------------------------------------------------------------------------------------------|----------------------------------------------------------------------------------------------------|---------------------------------------------------------------------------------------------------------------------------------|--------------------------------------------------------------------------------------------------------------|
| <b>Assessing Equity in Clinical Practice Guidelines (Dans et al., 2007)</b>                                                                                                                                                     |                                                                                                                                                                   |                                                                                             |                                                                                         |                                                                                                                                                               |                                                                                                    |                                                                                                                                 |                                                                                                              |
| 1. Discusses the burden of disease in disadvantaged Populations                                                                                                                                                                 | no                                                                                                                                                                | no                                                                                          | no                                                                                      | yes                                                                                                                                                           | yes                                                                                                | no                                                                                                                              | yes                                                                                                          |
| 2. Discusses differences between disadvantaged and privileged populations, in terms of the biology of the disease, adherence, and baseline risks                                                                                | no                                                                                                                                                                | no                                                                                          | no                                                                                      | no                                                                                                                                                            | no                                                                                                 | no                                                                                                                              | yes                                                                                                          |
| 3. Values [of the intervention/outcome] assessed in guideline development panels through consultations with disadvantaged populations, involvement of their caregivers, reference to relevant search, or transparent reflection | no                                                                                                                                                                | no                                                                                          | no                                                                                      | no                                                                                                                                                            | no                                                                                                 | no                                                                                                                              | yes                                                                                                          |
| 4. Discusses barriers to implementation in disadvantaged populations, and identifies strategies to overcome these barriers                                                                                                      | no                                                                                                                                                                | no                                                                                          | no                                                                                      | no                                                                                                                                                            | no                                                                                                 | no                                                                                                                              | yes                                                                                                          |
| 5. Plans for monitoring disadvantaged groups according to PROGRESS-plus elements                                                                                                                                                | no                                                                                                                                                                | no                                                                                          | no                                                                                      | no                                                                                                                                                            | no                                                                                                 | no                                                                                                                              | no                                                                                                           |
| <b>GRADE Equity Guideline: Equity Extension of the Guideline Development (Akl et al., 2017)</b>                                                                                                                                 |                                                                                                                                                                   |                                                                                             |                                                                                         |                                                                                                                                                               |                                                                                                    |                                                                                                                                 |                                                                                                              |
| 1. Setting priorities                                                                                                                                                                                                           |                                                                                                                                                                   |                                                                                             |                                                                                         |                                                                                                                                                               |                                                                                                    |                                                                                                                                 |                                                                                                              |
| a. Dedicates part of or entire guideline to the care of disadvantaged populations                                                                                                                                               | no                                                                                                                                                                | no                                                                                          | no                                                                                      | no                                                                                                                                                            | no                                                                                                 | no                                                                                                                              | yes                                                                                                          |
| 2. Guideline group membership                                                                                                                                                                                                   |                                                                                                                                                                   |                                                                                             |                                                                                         |                                                                                                                                                               |                                                                                                    |                                                                                                                                 |                                                                                                              |
| a. Includes representatives of the disadvantaged populations in the different guideline groups, particularly the voting panel                                                                                                   | no                                                                                                                                                                | no                                                                                          | yes                                                                                     | no                                                                                                                                                            | no                                                                                                 | no                                                                                                                              | no                                                                                                           |
| <b>Response Options:</b> Yes, No, Not Reported, or N/A (Not Applicable)                                                                                                                                                         |                                                                                                                                                                   |                                                                                             |                                                                                         |                                                                                                                                                               |                                                                                                    |                                                                                                                                 |                                                                                                              |

| Evaluation Tools and Items                                                                                                                                                                                            | Kochanek et al. (2019). Guidelines for the management of pediatric severe traumatic brain injury, third edition: Update of the brain trauma foundation guidelines | Liao et al. (2009). Clinical practice guidelines in severe traumatic brain injury in Taiwan | Luauté (2016). Behavioral and affective disorders after brain injury: French guidelines | Lumba-Brown et al. (2018). Centers for Disease Control and Prevention Guideline on the Diagnosis and Management of Mild Traumatic Brain Injury Among Children | VA/Dod clinical practice guideline for management of concussion/mild traumatic brain injury (2016) | Marshall et al. (2015). Updated clinical practice guidelines for concussion/mild traumatic brain injury and persistent symptoms | Motor Accidents Authority (2008). Guidelines for mild traumatic brain injury following a closed head injury. |
|-----------------------------------------------------------------------------------------------------------------------------------------------------------------------------------------------------------------------|-------------------------------------------------------------------------------------------------------------------------------------------------------------------|---------------------------------------------------------------------------------------------|-----------------------------------------------------------------------------------------|---------------------------------------------------------------------------------------------------------------------------------------------------------------|----------------------------------------------------------------------------------------------------|---------------------------------------------------------------------------------------------------------------------------------|--------------------------------------------------------------------------------------------------------------|
| b. Ensures the method for recruitment of group members considers representatives of all relevant disadvantaged populations                                                                                            | not reported                                                                                                                                                      | no                                                                                          | not reported                                                                            | no                                                                                                                                                            | no                                                                                                 | no                                                                                                                              | not reported                                                                                                 |
| c. Recruits a methodologist who is familiar with and mindful of equity issues                                                                                                                                         | not reported                                                                                                                                                      | no                                                                                          | no                                                                                      | no                                                                                                                                                            | no                                                                                                 | no                                                                                                                              | not reported                                                                                                 |
| d. Ensures the chair of the voting panel is familiar with equity issues                                                                                                                                               | not reported                                                                                                                                                      | not reported                                                                                | not reported                                                                            | not reported                                                                                                                                                  | no                                                                                                 | not reported                                                                                                                    | not reported                                                                                                 |
| 3. Identifying the target audience(s)                                                                                                                                                                                 |                                                                                                                                                                   |                                                                                             |                                                                                         |                                                                                                                                                               |                                                                                                    |                                                                                                                                 |                                                                                                              |
| a. Specifies relevant disadvantaged populations when identifying the target audience(s)                                                                                                                               | no                                                                                                                                                                | no                                                                                          | no                                                                                      | no                                                                                                                                                            | no                                                                                                 | no                                                                                                                              | no                                                                                                           |
| b. Involves representatives of the disadvantaged populations when identifying the target audience(s)                                                                                                                  | no                                                                                                                                                                | no                                                                                          | no                                                                                      | no                                                                                                                                                            | no                                                                                                 | no                                                                                                                              | no                                                                                                           |
| 4. Generating the guideline questions                                                                                                                                                                                 |                                                                                                                                                                   |                                                                                             |                                                                                         |                                                                                                                                                               |                                                                                                    |                                                                                                                                 |                                                                                                              |
| a. Considers equity when specifying elements of the PICO questions                                                                                                                                                    | no                                                                                                                                                                | not reported                                                                                | no                                                                                      | not reported                                                                                                                                                  | not reported                                                                                       | not reported                                                                                                                    | not reported                                                                                                 |
| b. Considers "good-practice statements" that could help address equity issues                                                                                                                                         | no                                                                                                                                                                | no                                                                                          | no                                                                                      | no                                                                                                                                                            | no                                                                                                 | no                                                                                                                              | no                                                                                                           |
| 5. Considers the importance of outcomes and interventions                                                                                                                                                             |                                                                                                                                                                   |                                                                                             |                                                                                         |                                                                                                                                                               |                                                                                                    |                                                                                                                                 |                                                                                                              |
| a. Involves representatives of disadvantaged populations in rating the importance of interventions and outcomes                                                                                                       | no                                                                                                                                                                | no                                                                                          | yes                                                                                     | no                                                                                                                                                            | no                                                                                                 | no                                                                                                                              | no                                                                                                           |
| b. Searches selected databases for outcomes rated as important by disadvantaged populations                                                                                                                           | no                                                                                                                                                                | no                                                                                          | no                                                                                      | no                                                                                                                                                            | no                                                                                                 | no                                                                                                                              | no                                                                                                           |
| c. Considers separate recommendations for disadvantaged populations if their values and preferences are thought to differ substantively to the point of affecting the strength and/or direction of the recommendation | no                                                                                                                                                                | no                                                                                          | no                                                                                      | no                                                                                                                                                            | no                                                                                                 | no                                                                                                                              | yes                                                                                                          |
| <b>Response Options:</b> Yes, No, Not Reported, or N/A (Not Applicable)                                                                                                                                               |                                                                                                                                                                   |                                                                                             |                                                                                         |                                                                                                                                                               |                                                                                                    |                                                                                                                                 |                                                                                                              |



| <p style="text-align: center;"><b>Evaluation Tools and Items</b></p>                                                    | <p style="text-align: center;">Kochanek et al. (2019). Guidelines for the management of pediatric severe traumatic brain injury, third edition: Update of the brain trauma foundation guidelines</p> | <p style="text-align: center;">Liao et al. (2009). Clinical practice guidelines in severe traumatic brain injury in Taiwan</p> | <p style="text-align: center;">Luauté (2016). Behavioral and affective disorders after brain injury: French guidelines</p> | <p style="text-align: center;">Lumba-Brown et al. (2018). Centers for Disease Control and Prevention Guideline on the Diagnosis and Management of Mild Traumatic Brain Injury Among Children</p> | <p style="text-align: center;">VA/Dod clinical practice guideline for management of concussion/mild traumatic brain injury (2016)</p> | <p style="text-align: center;">Marshall et al. (2015). Updated clinical practice guidelines for concussion/mild traumatic brain injury and persistent symptoms</p> | <p style="text-align: center;">Motor Accidents Authority (2008). Guidelines for mild traumatic brain injury following a closed head injury.</p> |
|-------------------------------------------------------------------------------------------------------------------------|------------------------------------------------------------------------------------------------------------------------------------------------------------------------------------------------------|--------------------------------------------------------------------------------------------------------------------------------|----------------------------------------------------------------------------------------------------------------------------|--------------------------------------------------------------------------------------------------------------------------------------------------------------------------------------------------|---------------------------------------------------------------------------------------------------------------------------------------|--------------------------------------------------------------------------------------------------------------------------------------------------------------------|-------------------------------------------------------------------------------------------------------------------------------------------------|
| <p>9. Evaluation and use<br/>a. Produces tools to facilitate implementation and use among disadvantaged populations</p> | <p style="text-align: center;">no</p>                                                                                                                                                                | <p style="text-align: center;">no</p>                                                                                          | <p style="text-align: center;">no</p>                                                                                      | <p style="text-align: center;">no</p>                                                                                                                                                            | <p style="text-align: center;">no</p>                                                                                                 | <p style="text-align: center;">no</p>                                                                                                                              | <p style="text-align: center;">Yes</p>                                                                                                          |
| <p>b. Monitors and audits implementation and use among disadvantaged populations</p>                                    | <p style="text-align: center;">no</p>                                                                                                                                                                | <p style="text-align: center;">no</p>                                                                                          | <p style="text-align: center;">no</p>                                                                                      | <p style="text-align: center;">no</p>                                                                                                                                                            | <p style="text-align: center;">no</p>                                                                                                 | <p style="text-align: center;">no</p>                                                                                                                              | <p style="text-align: center;">no</p>                                                                                                           |
| <p><b>Response Options:</b> Yes, No, Not Reported, or N/A (Not Applicable)</p>                                          |                                                                                                                                                                                                      |                                                                                                                                |                                                                                                                            |                                                                                                                                                                                                  |                                                                                                                                       |                                                                                                                                                                    |                                                                                                                                                 |

| Evaluation Tools and Items                                                                                                                                                                                                      | Morgan et al. (2017). CPG for the management of communication and swallowing disorders following paediatric TBI. | New Zealand Guidelines Group (2006). Traumatic brain injury: Diagnosis, acute management and rehabilitation | National Institute for Health and Clinical Excellence. 2014. NICE. Head Injury: Assessment and early management clinical guideline | New South Wales Ministry of Health. 2011. Adult trauma clinical practice guidelines - initial management of closed head injury in adults | Ontario Neurotrauma Foundation. 2018. Guideline for concussion/mild traumatic brain injury & prolonged symptoms. | Ontario Neurotrauma Foundation (2021 update). Living guideline for diagnosing and managing pediatric concussion | Pediatric Mild Traumatic Brain Injury Guideline Workgroup. (2016). Systematic review and clinical recommendations for healthcare providers on the diagnosis and management |
|---------------------------------------------------------------------------------------------------------------------------------------------------------------------------------------------------------------------------------|------------------------------------------------------------------------------------------------------------------|-------------------------------------------------------------------------------------------------------------|------------------------------------------------------------------------------------------------------------------------------------|------------------------------------------------------------------------------------------------------------------------------------------|------------------------------------------------------------------------------------------------------------------|-----------------------------------------------------------------------------------------------------------------|----------------------------------------------------------------------------------------------------------------------------------------------------------------------------|
| <b>Assessing Equity in Clinical Practice Guidelines (Dans et al., 2007)</b>                                                                                                                                                     |                                                                                                                  |                                                                                                             |                                                                                                                                    |                                                                                                                                          |                                                                                                                  |                                                                                                                 |                                                                                                                                                                            |
| 1. Discusses the burden of disease in disadvantaged Populations                                                                                                                                                                 | no                                                                                                               | yes                                                                                                         | no                                                                                                                                 | no                                                                                                                                       | no                                                                                                               | no                                                                                                              | no                                                                                                                                                                         |
| 2. Discusses differences between disadvantaged and privileged populations, in terms of the biology of the disease, adherence, and baseline risks                                                                                | no                                                                                                               | yes                                                                                                         | no                                                                                                                                 | no                                                                                                                                       | no                                                                                                               | no                                                                                                              | no                                                                                                                                                                         |
| 3. Values [of the intervention/outcome] assessed in guideline development panels through consultations with disadvantaged populations, involvement of their caregivers, reference to relevant search, or transparent reflection | no                                                                                                               | yes                                                                                                         | no                                                                                                                                 | no                                                                                                                                       | no                                                                                                               | no                                                                                                              | no                                                                                                                                                                         |
| 4. Discusses barriers to implementation in disadvantaged populations, and identifies strategies to overcome these barriers                                                                                                      | no                                                                                                               | yes                                                                                                         | no                                                                                                                                 | no                                                                                                                                       | no                                                                                                               | yes                                                                                                             | no                                                                                                                                                                         |
| 5. Plans for monitoring disadvantaged groups according to PROGRESS-plus elements                                                                                                                                                | no                                                                                                               | no                                                                                                          | no                                                                                                                                 | no                                                                                                                                       | no                                                                                                               | no                                                                                                              | no                                                                                                                                                                         |
| <b>GRADE Equity Guideline: Equity Extension of the Guideline Development (Akl et al., 2017)</b>                                                                                                                                 |                                                                                                                  |                                                                                                             |                                                                                                                                    |                                                                                                                                          |                                                                                                                  |                                                                                                                 |                                                                                                                                                                            |
| 1. Setting priorities                                                                                                                                                                                                           |                                                                                                                  |                                                                                                             |                                                                                                                                    |                                                                                                                                          |                                                                                                                  |                                                                                                                 |                                                                                                                                                                            |
| a. Dedicates part of or entire guideline to the care of disadvantaged populations                                                                                                                                               | yes                                                                                                              | yes                                                                                                         | no                                                                                                                                 | no                                                                                                                                       | no                                                                                                               | no                                                                                                              | no                                                                                                                                                                         |
| 2. Guideline group membership                                                                                                                                                                                                   |                                                                                                                  |                                                                                                             |                                                                                                                                    |                                                                                                                                          |                                                                                                                  |                                                                                                                 |                                                                                                                                                                            |
| a. Includes representatives of the disadvantaged populations in the different guideline groups, particularly the voting panel                                                                                                   | no                                                                                                               | no                                                                                                          | no                                                                                                                                 | no                                                                                                                                       | no                                                                                                               | no                                                                                                              | no                                                                                                                                                                         |
| <b>Response Options:</b> Yes, No, Not Reported, or N/A (Not Applicable)                                                                                                                                                         |                                                                                                                  |                                                                                                             |                                                                                                                                    |                                                                                                                                          |                                                                                                                  |                                                                                                                 |                                                                                                                                                                            |

| Evaluation Tools and Items                                                                                                                                                                                            | Morgan et al. (2017). CPG for the management of communication and swallowing disorders following paediatric TBI. | New Zealand Guidelines Group (2006). Traumatic brain injury: Diagnosis, acute management and rehabilitation | National Institute for Health and Clinical Excellence. 2014. NICE. Head Injury: Assessment and early management clinical guideline | New South Wales Ministry of Health. 2011. Adult trauma clinical practice guidelines - initial management of closed head injury in adults | Ontario Neurotrauma Foundation. 2018. Guideline for concussion/mild traumatic brain injury & prolonged symptoms. | Ontario Neurotrauma Foundation (2021 update). Living guideline for diagnosing and managing pediatric concussion | Pediatric Mild Traumatic Brain Injury Guideline Workgroup. (2016). Systematic review and clinical recommendations for healthcare providers on the diagnosis and management |
|-----------------------------------------------------------------------------------------------------------------------------------------------------------------------------------------------------------------------|------------------------------------------------------------------------------------------------------------------|-------------------------------------------------------------------------------------------------------------|------------------------------------------------------------------------------------------------------------------------------------|------------------------------------------------------------------------------------------------------------------------------------------|------------------------------------------------------------------------------------------------------------------|-----------------------------------------------------------------------------------------------------------------|----------------------------------------------------------------------------------------------------------------------------------------------------------------------------|
| b. Ensures the method for recruitment of group members considers representatives of all relevant disadvantaged populations                                                                                            | no                                                                                                               | not reported                                                                                                | not reported                                                                                                                       | not reported                                                                                                                             | no                                                                                                               | not reported                                                                                                    | no                                                                                                                                                                         |
| c. Recruits a methodologist who is familiar with and mindful of equity issues                                                                                                                                         | not reported                                                                                                     | no                                                                                                          | no                                                                                                                                 | no                                                                                                                                       | not reported                                                                                                     | not reported                                                                                                    | not reported                                                                                                                                                               |
| d. Ensures the chair of the voting panel is familiar with equity issues                                                                                                                                               | not reported                                                                                                     | no                                                                                                          | not reported                                                                                                                       | not reported                                                                                                                             | not reported                                                                                                     | not reported                                                                                                    | not reported                                                                                                                                                               |
| 3. Identifying the target audience(s)                                                                                                                                                                                 |                                                                                                                  |                                                                                                             |                                                                                                                                    |                                                                                                                                          |                                                                                                                  |                                                                                                                 |                                                                                                                                                                            |
| a. Specifies relevant disadvantaged populations when identifying the target audience(s)                                                                                                                               | no                                                                                                               | yes                                                                                                         | no                                                                                                                                 | no                                                                                                                                       | no                                                                                                               | no                                                                                                              | no                                                                                                                                                                         |
| b. Involves representatives of the disadvantaged populations when identifying the target audience(s)                                                                                                                  | no                                                                                                               | not reported                                                                                                | no                                                                                                                                 | no                                                                                                                                       | no                                                                                                               | no                                                                                                              | no                                                                                                                                                                         |
| 4. Generating the guideline questions                                                                                                                                                                                 |                                                                                                                  |                                                                                                             |                                                                                                                                    |                                                                                                                                          |                                                                                                                  |                                                                                                                 |                                                                                                                                                                            |
| a. Considers equity when specifying elements of the PICO questions                                                                                                                                                    | no                                                                                                               | not reported                                                                                                | no                                                                                                                                 | no                                                                                                                                       | no                                                                                                               | no                                                                                                              | no                                                                                                                                                                         |
| b. Considers "good-practice statements" that could help address equity issues                                                                                                                                         | no                                                                                                               | yes                                                                                                         | no                                                                                                                                 | no                                                                                                                                       | no                                                                                                               | no                                                                                                              | no                                                                                                                                                                         |
| 5. Considers the importance of outcomes and interventions                                                                                                                                                             |                                                                                                                  |                                                                                                             |                                                                                                                                    |                                                                                                                                          |                                                                                                                  |                                                                                                                 |                                                                                                                                                                            |
| a. Involves representatives of disadvantaged populations in rating the importance of interventions and outcomes                                                                                                       | no                                                                                                               | no                                                                                                          | no                                                                                                                                 | no                                                                                                                                       | no                                                                                                               | no                                                                                                              | no                                                                                                                                                                         |
| b. Searches selected databases for outcomes rated as important by disadvantaged populations                                                                                                                           | no                                                                                                               | no                                                                                                          | no                                                                                                                                 | no                                                                                                                                       | no                                                                                                               | no                                                                                                              | no                                                                                                                                                                         |
| c. Considers separate recommendations for disadvantaged populations if their values and preferences are thought to differ substantively to the point of affecting the strength and/or direction of the recommendation | yes                                                                                                              | yes                                                                                                         | yes                                                                                                                                | no                                                                                                                                       | no                                                                                                               | no                                                                                                              | no                                                                                                                                                                         |
| <b>Response Options:</b> Yes, No, Not Reported, or N/A (Not Applicable)                                                                                                                                               |                                                                                                                  |                                                                                                             |                                                                                                                                    |                                                                                                                                          |                                                                                                                  |                                                                                                                 |                                                                                                                                                                            |



| Evaluation Tools and Items                                                                                                                                                                                                                                                                                                                                                                                                                                                                                                                                                                                                                                                                                                                                                                                                                                                                                                                                                                                                                                                                                                                                                                                                                                                                                                                                                                       | Morgan et al. (2017). CPG for the management of communication and swallowing disorders following paediatric TBI.  | New Zealand Guidelines Group (2006). Traumatic brain injury: Diagnosis, acute management and rehabilitation          | National Institute for Health and Clinical Excellence. 2014. NICE. Head Injury: Assessment and early management clinical guideline | New South Wales Ministry of Health. 2011. Adult trauma clinical practice guidelines - initial management of closed head injury in adults | Ontario Neurotrauma Foundation. 2018. Guideline for concussion/mild traumatic brain injury & prolonged symptoms. | Ontario Neurotrauma Foundation (2021 update). Living guideline for diagnosing and managing pediatric concussion | Pediatric Mild Traumatic Brain Injury Guideline Workgroup. (2016). Systematic review and clinical recommendations for healthcare providers on the diagnosis and management |
|--------------------------------------------------------------------------------------------------------------------------------------------------------------------------------------------------------------------------------------------------------------------------------------------------------------------------------------------------------------------------------------------------------------------------------------------------------------------------------------------------------------------------------------------------------------------------------------------------------------------------------------------------------------------------------------------------------------------------------------------------------------------------------------------------------------------------------------------------------------------------------------------------------------------------------------------------------------------------------------------------------------------------------------------------------------------------------------------------------------------------------------------------------------------------------------------------------------------------------------------------------------------------------------------------------------------------------------------------------------------------------------------------|-------------------------------------------------------------------------------------------------------------------|----------------------------------------------------------------------------------------------------------------------|------------------------------------------------------------------------------------------------------------------------------------|------------------------------------------------------------------------------------------------------------------------------------------|------------------------------------------------------------------------------------------------------------------|-----------------------------------------------------------------------------------------------------------------|----------------------------------------------------------------------------------------------------------------------------------------------------------------------------|
| <p>6. Deciding what evidence to include and searching for evidence</p> <p>a. Seeks evidence specific to disadvantaged populations, for example, baseline risks specific to those groups</p> <p>b. Considers including evidence derived from fields other than health (e.g., social science) that address disadvantaged populations</p> <p>c. Searches literature published in the language relevant to the disadvantaged population</p> <p>7. Summarizing the evidence and considering additional information</p> <p>a. Considers the PROGRESS-plus elements when synthesizing the evidence</p> <p>b. Follows the PRISMA-equity statement when reporting the systematic reviews</p> <p>c. Considers information on resource use, cost, effect on equity, feasibility, and acceptability from the perspective of disadvantaged populations</p> <p>8. Wording of recommendations</p> <p>a. Specific in defining the population to maximize the understanding that it applies to a disadvantaged population (when applicable)</p> <p>b. Includes the necessary remarks following the recommendation to ensure its appropriate implementation in disadvantaged populations</p> <p>c. Ensures that the language is used carefully so that the recommendation does not stigmatize already disadvantaged populations</p> <p><b>Response Options:</b> Yes, No, Not Reported, or N/A (Not Applicable)</p> | <p>yes</p> <p>no</p> <p>no</p> <p>no</p> <p>no</p> <p>no</p> <p>no</p> <p>no</p> <p>yes</p> <p>yes</p> <p>yes</p> | <p>yes</p> <p>no</p> <p>not reported</p> <p>yes</p> <p>no</p> <p>yes</p> <p>yes</p> <p>yes</p> <p>yes</p> <p>yes</p> | <p>no</p> <p>no</p> <p>n/a</p> <p>no</p> <p>no</p> <p>yes</p> <p>n/a</p> <p>n/a</p> <p>n/a</p>                                     | <p>no</p> <p>no</p> <p>no</p> <p>no</p> <p>no</p> <p>no</p> <p>n/a</p> <p>n/a</p> <p>n/a</p>                                             | <p>no</p> <p>no</p> <p>n/a</p> <p>yes</p> <p>no</p> <p>no</p> <p>n/a</p> <p>n/a</p> <p>n/a</p>                   | <p>no</p> <p>no</p> <p>not reported</p> <p>no</p> <p>no</p> <p>no</p> <p>n/a</p> <p>n/a</p> <p>n/a</p>          | <p>no</p> <p>no</p> <p>n/a</p> <p>yes</p> <p>no</p> <p>no</p> <p>n/a</p> <p>n/a</p> <p>n/a</p>                                                                             |

| <p style="text-align: center;"><b>Evaluation Tools and Items</b></p>                                                    | <p>Morgan et al. (2017). CPG for the management of communication and swallowing disorders following paediatric TBI.</p> | <p>New Zealand Guidelines Group (2006). Traumatic brain injury: Diagnosis, acute management and rehabilitation</p> | <p>National Institute for Health and Clinical Excellence. 2014. NICE. Head Injury: Assessment and early management clinical guideline</p> | <p>New South Wales Ministry of Health. 2011. Adult trauma clinical practice guidelines - initial management of closed head injury in adults</p> | <p>Ontario Neurotrauma Foundation. 2018. Guideline for concussion/mild traumatic brain injury &amp; prolonged symptoms.</p> | <p>Ontario Neurotrauma Foundation (2021 update). Living guideline for diagnosing and managing pediatric concussion</p> | <p>Pediatric Mild Traumatic Brain Injury Guideline Workgroup. (2016). Systematic review and clinical recommendations for healthcare providers on the diagnosis and management</p> |
|-------------------------------------------------------------------------------------------------------------------------|-------------------------------------------------------------------------------------------------------------------------|--------------------------------------------------------------------------------------------------------------------|-------------------------------------------------------------------------------------------------------------------------------------------|-------------------------------------------------------------------------------------------------------------------------------------------------|-----------------------------------------------------------------------------------------------------------------------------|------------------------------------------------------------------------------------------------------------------------|-----------------------------------------------------------------------------------------------------------------------------------------------------------------------------------|
| <p>9. Evaluation and use<br/>a. Produces tools to facilitate implementation and use among disadvantaged populations</p> | <p style="text-align: center;">no</p>                                                                                   | <p style="text-align: center;">no</p>                                                                              | <p style="text-align: center;">yes</p>                                                                                                    | <p style="text-align: center;">yes</p>                                                                                                          | <p style="text-align: center;">no</p>                                                                                       | <p style="text-align: center;">yes</p>                                                                                 | <p style="text-align: center;">no</p>                                                                                                                                             |
| <p>b. Monitors and audits implementation and use among disadvantaged populations</p>                                    | <p style="text-align: center;">no</p>                                                                                   | <p style="text-align: center;">no</p>                                                                              | <p style="text-align: center;">no</p>                                                                                                     | <p style="text-align: center;">no</p>                                                                                                           | <p style="text-align: center;">no</p>                                                                                       | <p style="text-align: center;">no</p>                                                                                  | <p style="text-align: center;">no</p>                                                                                                                                             |
| <p><b>Response Options:</b> Yes, No, Not Reported, or N/A (Not Applicable)</p>                                          |                                                                                                                         |                                                                                                                    |                                                                                                                                           |                                                                                                                                                 |                                                                                                                             |                                                                                                                        |                                                                                                                                                                                   |

| Evaluation Tools and Items                                                                                                                                                                                                      | Quatman-Yates (2020). Physical therapy evaluation and treatment after concussion/mild traumatic brain injury | Ryan et al. (2020). ACR appropriateness criteria head trauma - child | Shih et al. (2021). ACR appropriateness criteria head trauma: 2021 update | Scottish Intercollegiate Guidelines Network (2009). Early management of patients with a head injury. A national clinical guideline | Silverberg et al. 2014. Is rest after concussion "the best medicine" - Recommendations for activity resumption following concussion in athletes, civilians and military service members | Stergio-Kita et al. (2012). Inter-professional clinical practice guideline for vocational evaluation following traumatic brain injury: a systematic and evidence-based approach | Tenney et al. (2021). Practice guideline: Use of quantitative EEG for the diagnosis of mild traumatic brain injury: Report of the guideline committee of the american clinical neurophysiology society | Uden et al. (2013). Scandinavian guidelines for initial management of minimal, mild, and moderate head injuries in adults: An evidence and consensus-based update |
|---------------------------------------------------------------------------------------------------------------------------------------------------------------------------------------------------------------------------------|--------------------------------------------------------------------------------------------------------------|----------------------------------------------------------------------|---------------------------------------------------------------------------|------------------------------------------------------------------------------------------------------------------------------------|-----------------------------------------------------------------------------------------------------------------------------------------------------------------------------------------|---------------------------------------------------------------------------------------------------------------------------------------------------------------------------------|--------------------------------------------------------------------------------------------------------------------------------------------------------------------------------------------------------|-------------------------------------------------------------------------------------------------------------------------------------------------------------------|
| <b>Assessing Equity in Clinical Practice Guidelines (Dans et al., 2007)</b>                                                                                                                                                     |                                                                                                              |                                                                      |                                                                           |                                                                                                                                    |                                                                                                                                                                                         |                                                                                                                                                                                 |                                                                                                                                                                                                        |                                                                                                                                                                   |
| 1. Discusses the burden of disease in disadvantaged Populations                                                                                                                                                                 | no                                                                                                           | no                                                                   | no                                                                        | no                                                                                                                                 | no                                                                                                                                                                                      | yes                                                                                                                                                                             | no                                                                                                                                                                                                     | no                                                                                                                                                                |
| 2. Discusses differences between disadvantaged and privileged populations, in terms of the biology of the disease, adherence, and baseline risks                                                                                | no                                                                                                           | no                                                                   | no                                                                        | no                                                                                                                                 | no                                                                                                                                                                                      | no                                                                                                                                                                              | no                                                                                                                                                                                                     | no                                                                                                                                                                |
| 3. Values [of the intervention/outcome] assessed in guideline development panels through consultations with disadvantaged populations, involvement of their caregivers, reference to relevant search, or transparent reflection | no                                                                                                           | no                                                                   | no                                                                        | no                                                                                                                                 | no                                                                                                                                                                                      | no                                                                                                                                                                              | no                                                                                                                                                                                                     | no                                                                                                                                                                |
| 4. Discusses barriers to implementation in disadvantaged populations, and identifies strategies to overcome these barriers                                                                                                      | no                                                                                                           | no                                                                   | no                                                                        | yes                                                                                                                                | no                                                                                                                                                                                      | no                                                                                                                                                                              | no                                                                                                                                                                                                     | no                                                                                                                                                                |
| 5. Plans for monitoring disadvantaged groups according to PROGRESS-plus elements                                                                                                                                                | no                                                                                                           | no                                                                   | no                                                                        | no                                                                                                                                 | no                                                                                                                                                                                      | no                                                                                                                                                                              | no                                                                                                                                                                                                     | no                                                                                                                                                                |
| <b>GRADE Equity Guideline: Equity Extension of the Guideline Development (Akl et al., 2017)</b>                                                                                                                                 |                                                                                                              |                                                                      |                                                                           |                                                                                                                                    |                                                                                                                                                                                         |                                                                                                                                                                                 |                                                                                                                                                                                                        |                                                                                                                                                                   |
| 1. Setting priorities                                                                                                                                                                                                           |                                                                                                              |                                                                      |                                                                           |                                                                                                                                    |                                                                                                                                                                                         |                                                                                                                                                                                 |                                                                                                                                                                                                        |                                                                                                                                                                   |
| a. Dedicates part of or entire guideline to the care of disadvantaged populations                                                                                                                                               | no                                                                                                           | no                                                                   | no                                                                        | no                                                                                                                                 | no                                                                                                                                                                                      | no                                                                                                                                                                              | no                                                                                                                                                                                                     | no                                                                                                                                                                |
| 2. Guideline group membership                                                                                                                                                                                                   |                                                                                                              |                                                                      |                                                                           |                                                                                                                                    |                                                                                                                                                                                         |                                                                                                                                                                                 |                                                                                                                                                                                                        |                                                                                                                                                                   |
| a. Includes representatives of the disadvantaged populations in the different guideline groups, particularly the voting panel                                                                                                   | no                                                                                                           | no                                                                   | no                                                                        | no                                                                                                                                 | no                                                                                                                                                                                      | no                                                                                                                                                                              | no                                                                                                                                                                                                     | no                                                                                                                                                                |
| <b>Response Options:</b> Yes, No, Not Reported, or N/A (Not Applicable)                                                                                                                                                         |                                                                                                              |                                                                      |                                                                           |                                                                                                                                    |                                                                                                                                                                                         |                                                                                                                                                                                 |                                                                                                                                                                                                        |                                                                                                                                                                   |

| Evaluation Tools and Items                                                                                                                                                                                            | Quatman-Yates (2020). Physical therapy evaluation and treatment after concussion/mild traumatic brain injury | Ryan et al. (2020). ACR appropriateness criteria head trauma - child | Shih et al. (2021). ACR appropriateness criteria head trauma: 2021 update | Scottish Intercollegiate Guidelines Network (2009). Early management of patients with a head injury. A national clinical guideline | Silverberg et al. 2014. Is rest after concussion "the best medicine" - Recommendations for activity resumption following concussion in athletes, civilians and military service members | Stergio-Kita et al. (2012). Inter-professional clinical practice guideline for vocational evaluation following traumatic brain injury: a systematic and evidence-based approach | Tenney et al. (2021). Practice guideline: Use of quantitative EEG for the diagnosis of mild traumatic brain injury: Report of the guideline committee of the American clinical neurophysiology society | Uden et al. (2013). Scandinavian guidelines for initial management of minimal, mild, and moderate head injuries in adults: An evidence and consensus-based update |
|-----------------------------------------------------------------------------------------------------------------------------------------------------------------------------------------------------------------------|--------------------------------------------------------------------------------------------------------------|----------------------------------------------------------------------|---------------------------------------------------------------------------|------------------------------------------------------------------------------------------------------------------------------------|-----------------------------------------------------------------------------------------------------------------------------------------------------------------------------------------|---------------------------------------------------------------------------------------------------------------------------------------------------------------------------------|--------------------------------------------------------------------------------------------------------------------------------------------------------------------------------------------------------|-------------------------------------------------------------------------------------------------------------------------------------------------------------------|
| b. Ensures the method for recruitment of group members considers representatives of all relevant disadvantaged populations                                                                                            | no                                                                                                           | not reported                                                         | not reported                                                              | not reported                                                                                                                       | not reported                                                                                                                                                                            | no                                                                                                                                                                              | no                                                                                                                                                                                                     | no                                                                                                                                                                |
| c. Recruits a methodologist who is familiar with and mindful of equity issues                                                                                                                                         | no                                                                                                           | not reported                                                         | not reported                                                              | no                                                                                                                                 | not reported                                                                                                                                                                            | no                                                                                                                                                                              | no                                                                                                                                                                                                     | no                                                                                                                                                                |
| d. Ensures the chair of the voting panel is familiar with equity issues                                                                                                                                               | not reported                                                                                                 | not reported                                                         | not reported                                                              | not reported                                                                                                                       | not reported                                                                                                                                                                            | not reported                                                                                                                                                                    | not reported                                                                                                                                                                                           | not reported                                                                                                                                                      |
| 3. Identifying the target audience(s)                                                                                                                                                                                 |                                                                                                              |                                                                      |                                                                           |                                                                                                                                    |                                                                                                                                                                                         |                                                                                                                                                                                 |                                                                                                                                                                                                        |                                                                                                                                                                   |
| a. Specifies relevant disadvantaged populations when identifying the target audience(s)                                                                                                                               | no                                                                                                           | no                                                                   | no                                                                        | no                                                                                                                                 | no                                                                                                                                                                                      | no                                                                                                                                                                              | no                                                                                                                                                                                                     | no                                                                                                                                                                |
| b. Involves representatives of the disadvantaged populations when identifying the target audience(s)                                                                                                                  | no                                                                                                           | no                                                                   | no                                                                        | no                                                                                                                                 | no                                                                                                                                                                                      | no                                                                                                                                                                              | no                                                                                                                                                                                                     | no                                                                                                                                                                |
| 4. Generating the guideline questions                                                                                                                                                                                 |                                                                                                              |                                                                      |                                                                           |                                                                                                                                    |                                                                                                                                                                                         |                                                                                                                                                                                 |                                                                                                                                                                                                        |                                                                                                                                                                   |
| a. Considers equity when specifying elements of the PICO questions                                                                                                                                                    | not reported                                                                                                 | not reported                                                         | not reported                                                              | not reported                                                                                                                       | no                                                                                                                                                                                      | no                                                                                                                                                                              | no                                                                                                                                                                                                     | no                                                                                                                                                                |
| b. Considers "good-practice statements" that could help address equity issues                                                                                                                                         | no                                                                                                           | no                                                                   | no                                                                        | no                                                                                                                                 | no                                                                                                                                                                                      | no                                                                                                                                                                              | no                                                                                                                                                                                                     | no                                                                                                                                                                |
| 5. Considers the importance of outcomes and interventions                                                                                                                                                             |                                                                                                              |                                                                      |                                                                           |                                                                                                                                    |                                                                                                                                                                                         |                                                                                                                                                                                 |                                                                                                                                                                                                        |                                                                                                                                                                   |
| a. Involves representatives of disadvantaged populations in rating the importance of interventions and outcomes                                                                                                       | no                                                                                                           | no                                                                   | no                                                                        | no                                                                                                                                 | no                                                                                                                                                                                      | no                                                                                                                                                                              | no                                                                                                                                                                                                     | no                                                                                                                                                                |
| b. Searches selected databases for outcomes rated as important by disadvantaged populations                                                                                                                           | no                                                                                                           | no                                                                   | no                                                                        | no                                                                                                                                 | no                                                                                                                                                                                      | no                                                                                                                                                                              | no                                                                                                                                                                                                     | no                                                                                                                                                                |
| c. Considers separate recommendations for disadvantaged populations if their values and preferences are thought to differ substantively to the point of affecting the strength and/or direction of the recommendation | no                                                                                                           | no                                                                   | no                                                                        | no                                                                                                                                 | no                                                                                                                                                                                      | yes                                                                                                                                                                             | no                                                                                                                                                                                                     | no                                                                                                                                                                |
| <b>Response Options:</b> Yes, No, Not Reported, or N/A (Not Applicable)                                                                                                                                               |                                                                                                              |                                                                      |                                                                           |                                                                                                                                    |                                                                                                                                                                                         |                                                                                                                                                                                 |                                                                                                                                                                                                        |                                                                                                                                                                   |





| Evaluation Tools and Items                                                                                                                                                                                                      | Vos et al. (2012). EFNS guidelines, Mild traumatic brain injury | Warden et al. (2006). Guidelines for the pharmacologic treatment of neurobehavioural sequelae of traumatic brain injury | Wheeler et al. (2016). Occupational therapy practice guidelines for adults with traumatic brain injury | Wintermark et al. 2015. Imaging Evidence and Recommendations for Traumatic Brain Injury: Advanced Neuro- and Neurovascular Imaging Techniques | Wintermark et al. 2015. Imaging Evidence and Recommendations for Traumatic Brain Injury: Conventional Neuroimaging Techniques | Workplace Safety and Insurance Board (WSIB) . 2012. Mild Traumatic Brain Injury Program of Care | National Institute for Health and Clinical Excellence. (2014). Head Injury, Triage, assessment, investigation and early management of head injury in infants, children and adults | INESSS (FRENCH) 2021 Assessment and Risk Management of Severe Neurological Complications Following Mild Traumatic Brain Injury |
|---------------------------------------------------------------------------------------------------------------------------------------------------------------------------------------------------------------------------------|-----------------------------------------------------------------|-------------------------------------------------------------------------------------------------------------------------|--------------------------------------------------------------------------------------------------------|-----------------------------------------------------------------------------------------------------------------------------------------------|-------------------------------------------------------------------------------------------------------------------------------|-------------------------------------------------------------------------------------------------|-----------------------------------------------------------------------------------------------------------------------------------------------------------------------------------|--------------------------------------------------------------------------------------------------------------------------------|
| <b>Assessing Equity in Clinical Practice Guidelines (Dans et al., 2007)</b>                                                                                                                                                     |                                                                 |                                                                                                                         |                                                                                                        |                                                                                                                                               |                                                                                                                               |                                                                                                 |                                                                                                                                                                                   |                                                                                                                                |
| 1. Discusses the burden of disease in disadvantaged Populations                                                                                                                                                                 | no                                                              | no                                                                                                                      | no                                                                                                     | no                                                                                                                                            | no                                                                                                                            | no                                                                                              | no                                                                                                                                                                                | no                                                                                                                             |
| 2. Discusses differences between disadvantaged and privileged populations, in terms of the biology of the disease, adherence, and baseline risks                                                                                | no                                                              | no                                                                                                                      | no                                                                                                     | no                                                                                                                                            | no                                                                                                                            | no                                                                                              | no                                                                                                                                                                                | no                                                                                                                             |
| 3. Values [of the intervention/outcome] assessed in guideline development panels through consultations with disadvantaged populations, involvement of their caregivers, reference to relevant search, or transparent reflection | no                                                              | no                                                                                                                      | no                                                                                                     | no                                                                                                                                            | no                                                                                                                            | no                                                                                              | no                                                                                                                                                                                | no                                                                                                                             |
| 4. Discusses barriers to implementation in disadvantaged populations, and identifies strategies to overcome these barriers                                                                                                      | no                                                              | no                                                                                                                      | no                                                                                                     | no                                                                                                                                            | no                                                                                                                            | no                                                                                              | no                                                                                                                                                                                | no                                                                                                                             |
| 5. Plans for monitoring disadvantaged groups according to PROGRESS-plus elements                                                                                                                                                | no                                                              | no                                                                                                                      | no                                                                                                     | no                                                                                                                                            | no                                                                                                                            | no                                                                                              | no                                                                                                                                                                                | no                                                                                                                             |
| <b>GRADE Equity Guideline: Equity Extension of the Guideline Development (Akl et al., 2017)</b>                                                                                                                                 |                                                                 |                                                                                                                         |                                                                                                        |                                                                                                                                               |                                                                                                                               |                                                                                                 |                                                                                                                                                                                   |                                                                                                                                |
| 1. Setting priorities                                                                                                                                                                                                           |                                                                 |                                                                                                                         |                                                                                                        |                                                                                                                                               |                                                                                                                               |                                                                                                 |                                                                                                                                                                                   |                                                                                                                                |
| a. Dedicates part of or entire guideline to the care of disadvantaged populations                                                                                                                                               | no                                                              | no                                                                                                                      | no                                                                                                     | no                                                                                                                                            | no                                                                                                                            | no                                                                                              | no                                                                                                                                                                                | no                                                                                                                             |
| 2. Guideline group membership                                                                                                                                                                                                   |                                                                 |                                                                                                                         |                                                                                                        |                                                                                                                                               |                                                                                                                               |                                                                                                 |                                                                                                                                                                                   |                                                                                                                                |
| a. Includes representatives of the disadvantaged populations in the different guideline groups, particularly the voting panel                                                                                                   | no                                                              | no                                                                                                                      | no                                                                                                     | no                                                                                                                                            | no                                                                                                                            | no                                                                                              | no                                                                                                                                                                                | no                                                                                                                             |
| <b>Response Options:</b> Yes, No, Not Reported, or N/A (Not Applicable)                                                                                                                                                         |                                                                 |                                                                                                                         |                                                                                                        |                                                                                                                                               |                                                                                                                               |                                                                                                 |                                                                                                                                                                                   |                                                                                                                                |

| Evaluation Tools and Items                                                                                                                                                                                            | Vos et al. (2012). EFNS guidelines, Mild traumatic brain injury | Warden et al. (2006). Guidelines for the pharmacologic treatment of neurobehavioural sequelae of traumatic brain injury | Wheeler et al. (2016). Occupational therapy practice guidelines for adults with traumatic brain injury | Wintermark et al. 2015. Imaging Evidence and Recommendations for Traumatic Brain Injury: Advanced Neuro- and Neurovascular Imaging Techniques | Wintermark et al. 2015. Imaging Evidence and Recommendations for Traumatic Brain Injury: Conventional Neuroimaging Techniques | Workplace Safety and Insurance Board (WSIB) . 2012. Mild Traumatic Brain Injury Program of Care | National Institute for Health and Clinical Excellence. (2014). Head Injury, Triage, assessment, investigation and early management of head injury in infants, children and adults | INESSS (FRENCH) 2021 Assessment and Risk Management of Severe Neurological Complications Following Mild Traumatic Brain Injury |
|-----------------------------------------------------------------------------------------------------------------------------------------------------------------------------------------------------------------------|-----------------------------------------------------------------|-------------------------------------------------------------------------------------------------------------------------|--------------------------------------------------------------------------------------------------------|-----------------------------------------------------------------------------------------------------------------------------------------------|-------------------------------------------------------------------------------------------------------------------------------|-------------------------------------------------------------------------------------------------|-----------------------------------------------------------------------------------------------------------------------------------------------------------------------------------|--------------------------------------------------------------------------------------------------------------------------------|
| b. Ensures the method for recruitment of group members considers representatives of all relevant disadvantaged populations                                                                                            | no                                                              | not reported                                                                                                            | not reported                                                                                           | not reported                                                                                                                                  | not reported                                                                                                                  | not reported                                                                                    | not reported                                                                                                                                                                      | no                                                                                                                             |
| c. Recruits a methodologist who is familiar with and mindful of equity issues                                                                                                                                         | no                                                              | not reported                                                                                                            | no                                                                                                     | not reported                                                                                                                                  | not reported                                                                                                                  | no                                                                                              | not reported                                                                                                                                                                      | no                                                                                                                             |
| d. Ensures the chair of the voting panel is familiar with equity issues                                                                                                                                               | not reported                                                    | not reported                                                                                                            | not reported                                                                                           | not reported                                                                                                                                  | not reported                                                                                                                  | not reported                                                                                    | no                                                                                                                                                                                | no                                                                                                                             |
| 3. Identifying the target audience(s)                                                                                                                                                                                 |                                                                 |                                                                                                                         |                                                                                                        |                                                                                                                                               |                                                                                                                               |                                                                                                 |                                                                                                                                                                                   |                                                                                                                                |
| a. Specifies relevant disadvantaged populations when identifying the target audience(s)                                                                                                                               | no                                                              | no                                                                                                                      | no                                                                                                     | no                                                                                                                                            | no                                                                                                                            | no                                                                                              | no                                                                                                                                                                                | no                                                                                                                             |
| b. Involves representatives of the disadvantaged populations when identifying the target audience(s)                                                                                                                  | no                                                              | no                                                                                                                      | no                                                                                                     | no                                                                                                                                            | no                                                                                                                            | no                                                                                              | no                                                                                                                                                                                | no                                                                                                                             |
| 4. Generating the guideline questions                                                                                                                                                                                 |                                                                 |                                                                                                                         |                                                                                                        |                                                                                                                                               |                                                                                                                               |                                                                                                 |                                                                                                                                                                                   |                                                                                                                                |
| a. Considers equity when specifying elements of the PICO questions                                                                                                                                                    | no                                                              | no                                                                                                                      | no                                                                                                     | not reported                                                                                                                                  | no                                                                                                                            | no                                                                                              | no                                                                                                                                                                                | no                                                                                                                             |
| b. Considers "good-practice statements" that could help address equity issues                                                                                                                                         | no                                                              | no                                                                                                                      | no                                                                                                     | no                                                                                                                                            | no                                                                                                                            | no                                                                                              | no                                                                                                                                                                                | no                                                                                                                             |
| 5. Considers the importance of outcomes and interventions                                                                                                                                                             |                                                                 |                                                                                                                         |                                                                                                        |                                                                                                                                               |                                                                                                                               |                                                                                                 |                                                                                                                                                                                   |                                                                                                                                |
| a. Involves representatives of disadvantaged populations in rating the importance of interventions and outcomes                                                                                                       | no                                                              | no                                                                                                                      | no                                                                                                     | no                                                                                                                                            | no                                                                                                                            | no                                                                                              | no                                                                                                                                                                                | no                                                                                                                             |
| b. Searches selected databases for outcomes rated as important by disadvantaged populations                                                                                                                           | no                                                              | no                                                                                                                      | no                                                                                                     | no                                                                                                                                            | no                                                                                                                            | no                                                                                              | no                                                                                                                                                                                | no                                                                                                                             |
| c. Considers separate recommendations for disadvantaged populations if their values and preferences are thought to differ substantively to the point of affecting the strength and/or direction of the recommendation | no                                                              | no                                                                                                                      | no                                                                                                     | no                                                                                                                                            | no                                                                                                                            | no                                                                                              | no                                                                                                                                                                                | no                                                                                                                             |
| <b>Response Options:</b> Yes, No, Not Reported, or N/A (Not Applicable)                                                                                                                                               |                                                                 |                                                                                                                         |                                                                                                        |                                                                                                                                               |                                                                                                                               |                                                                                                 |                                                                                                                                                                                   |                                                                                                                                |



| <p align="center"><b>Evaluation Tools and Items</b></p>                                                                                                                                                                                                                                                                                                                                                                                                                                                                                                                                                                                                                                                                                                                                                                                                                                                                                                                                                                                                                                                                                                                                                                                                                                                                                                                                          | <p align="center">Vos et al. (2012). EFNS guidelines, Mild traumatic brain injury</p>                                                                                                                                                                           | <p align="center">Warden et al. (2006). Guidelines for the pharmacologic treatment of neurobehavioural sequelae of traumatic brain injury</p>                                                                                        | <p align="center">Wheeler et al. (2016). Occupational therapy practice guidelines for adults with traumatic brain injury</p>                                                                                                         | <p align="center">Wintermark et al. 2015. Imaging Evidence and Recommendations for Traumatic Brain Injury: Advanced Neuro- and Neurovascular Imaging Techniques</p>                                                                  | <p align="center">Wintermark et al. 2015. Imaging Evidence and Recommendations for Traumatic Brain Injury: Conventional Neuroimaging Techniques</p>                                                                                  | <p align="center">Workplace Safety and Insurance Board (WSIB) . 2012. Mild Traumatic Brain Injury Program of Care</p>                                                                                                                | <p align="center">National Institute for Health and Clinical Excellence. (2014). Head Injury, Triage, assessment, investigation and early management of head injury in infants, children and adults</p>                                                        | <p align="center">INESSS (FRENCH) 2021 Assessment and Risk Management of Severe Neurological Complications Following Mild Traumatic Brain Injury</p>                                                                                 |
|--------------------------------------------------------------------------------------------------------------------------------------------------------------------------------------------------------------------------------------------------------------------------------------------------------------------------------------------------------------------------------------------------------------------------------------------------------------------------------------------------------------------------------------------------------------------------------------------------------------------------------------------------------------------------------------------------------------------------------------------------------------------------------------------------------------------------------------------------------------------------------------------------------------------------------------------------------------------------------------------------------------------------------------------------------------------------------------------------------------------------------------------------------------------------------------------------------------------------------------------------------------------------------------------------------------------------------------------------------------------------------------------------|-----------------------------------------------------------------------------------------------------------------------------------------------------------------------------------------------------------------------------------------------------------------|--------------------------------------------------------------------------------------------------------------------------------------------------------------------------------------------------------------------------------------|--------------------------------------------------------------------------------------------------------------------------------------------------------------------------------------------------------------------------------------|--------------------------------------------------------------------------------------------------------------------------------------------------------------------------------------------------------------------------------------|--------------------------------------------------------------------------------------------------------------------------------------------------------------------------------------------------------------------------------------|--------------------------------------------------------------------------------------------------------------------------------------------------------------------------------------------------------------------------------------|----------------------------------------------------------------------------------------------------------------------------------------------------------------------------------------------------------------------------------------------------------------|--------------------------------------------------------------------------------------------------------------------------------------------------------------------------------------------------------------------------------------|
| <p>6. Deciding what evidence to include and searching for evidence</p> <p>a. Seeks evidence specific to disadvantaged populations, for example, baseline risks specific to those groups</p> <p>b. Considers including evidence derived from fields other than health (e.g., social science) that address disadvantaged populations</p> <p>c. Searches literature published in the language relevant to the disadvantaged population</p> <p>7. Summarizing the evidence and considering additional information</p> <p>a. Considers the PROGRESS-plus elements when synthesizing the evidence</p> <p>b. Follows the PRISMA-equity statement when reporting the systematic reviews</p> <p>c. Considers information on resource use, cost, effect on equity, feasibility, and acceptability from the perspective of disadvantaged populations</p> <p>8. Wording of recommendations</p> <p>a. Specific in defining the population to maximize the understanding that it applies to a disadvantaged population (when applicable)</p> <p>b. Includes the necessary remarks following the recommendation to ensure its appropriate implementation in disadvantaged populations</p> <p>c. Ensures that the language is used carefully so that the recommendation does not stigmatize already disadvantaged populations</p> <p><b>Response Options:</b> Yes, No, Not Reported, or N/A (Not Applicable)</p> | <p align="center">no</p> <p align="center">no</p> <p align="center">n/a</p> <p align="center">yes</p> <p align="center">no</p> <p align="center">no</p> <p align="center">n/a</p> <p align="center">n/a</p> <p align="center">n/a</p> <p align="center">n/a</p> | <p align="center">no</p> <p align="center">no</p> <p align="center">n/a</p> <p align="center">no</p> <p align="center">no</p> <p align="center">no</p> <p align="center">n/a</p> <p align="center">n/a</p> <p align="center">n/a</p> | <p align="center">no</p> <p align="center">no</p> <p align="center">n/a</p> <p align="center">no</p> <p align="center">no</p> <p align="center">no</p> <p align="center">n/a</p> <p align="center">n/a</p> <p align="center">n/a</p> | <p align="center">no</p> <p align="center">no</p> <p align="center">n/a</p> <p align="center">no</p> <p align="center">no</p> <p align="center">no</p> <p align="center">n/a</p> <p align="center">n/a</p> <p align="center">n/a</p> | <p align="center">no</p> <p align="center">no</p> <p align="center">n/a</p> <p align="center">no</p> <p align="center">no</p> <p align="center">no</p> <p align="center">n/a</p> <p align="center">n/a</p> <p align="center">n/a</p> | <p align="center">no</p> <p align="center">no</p> <p align="center">n/a</p> <p align="center">no</p> <p align="center">no</p> <p align="center">no</p> <p align="center">n/a</p> <p align="center">n/a</p> <p align="center">n/a</p> | <p align="center">no</p> <p align="center">no</p> <p align="center">n/a</p> <p align="center">yes</p> <p align="center">no</p> <p align="center">no</p> <p align="center">no</p> <p align="center">n/a</p> <p align="center">n/a</p> <p align="center">n/a</p> | <p align="center">no</p> <p align="center">no</p> <p align="center">n/a</p> <p align="center">no</p> <p align="center">no</p> <p align="center">no</p> <p align="center">n/a</p> <p align="center">n/a</p> <p align="center">n/a</p> |



| Evaluation Tools and Items                                                                                                                                                                                                      | The Management and Rehabilitation of Post-Acute mTBI Work Group. (2021). VA/DoD CPG for the management and rehabilitation of post-acute mTBI | Giza et al. (2013). Evidence-based guideline update: Evaluation and management of concussion in sports | Trevena et al. 2004. Clinical practice guidelines for the care of people living with traumatic brain injury in the community | American Academy of Neurology (2003). Practice parameter: Antiepileptic drug prophylaxis in severe traumatic brain injury | Evans et al. (2022). Acute mild traumatic brain injury (concussion) in adults | Vavilala et al. (2021). Severe traumatic brain injury (TBI) in children: Initial evaluation and management | Lim et al. (2021). Sleep-wake disorders in patients with traumatic brain injury | Schutzman (2021). Minor head trauma in infants and children: Management |
|---------------------------------------------------------------------------------------------------------------------------------------------------------------------------------------------------------------------------------|----------------------------------------------------------------------------------------------------------------------------------------------|--------------------------------------------------------------------------------------------------------|------------------------------------------------------------------------------------------------------------------------------|---------------------------------------------------------------------------------------------------------------------------|-------------------------------------------------------------------------------|------------------------------------------------------------------------------------------------------------|---------------------------------------------------------------------------------|-------------------------------------------------------------------------|
| <b>Assessing Equity in Clinical Practice Guidelines (Dans et al., 2007)</b>                                                                                                                                                     |                                                                                                                                              |                                                                                                        |                                                                                                                              |                                                                                                                           |                                                                               |                                                                                                            |                                                                                 |                                                                         |
| 1. Discusses the burden of disease in disadvantaged Populations                                                                                                                                                                 | no                                                                                                                                           | no                                                                                                     | no                                                                                                                           | no                                                                                                                        | no                                                                            | no                                                                                                         | no                                                                              | no                                                                      |
| 2. Discusses differences between disadvantaged and privileged populations, in terms of the biology of the disease, adherence, and baseline risks                                                                                | no                                                                                                                                           | no                                                                                                     | no                                                                                                                           | no                                                                                                                        | no                                                                            | no                                                                                                         | no                                                                              | no                                                                      |
| 3. Values [of the intervention/outcome] assessed in guideline development panels through consultations with disadvantaged populations, involvement of their caregivers, reference to relevant search, or transparent reflection | no                                                                                                                                           | no                                                                                                     | no                                                                                                                           | no                                                                                                                        | no                                                                            | no                                                                                                         | no                                                                              | no                                                                      |
| 4. Discusses barriers to implementation in disadvantaged populations, and identifies strategies to overcome these barriers                                                                                                      | no                                                                                                                                           | no                                                                                                     | no                                                                                                                           | no                                                                                                                        | no                                                                            | no                                                                                                         | no                                                                              | no                                                                      |
| 5. Plans for monitoring disadvantaged groups according to PROGRESS-plus elements                                                                                                                                                | no                                                                                                                                           | no                                                                                                     | no                                                                                                                           | no                                                                                                                        | no                                                                            | no                                                                                                         | no                                                                              | no                                                                      |
| <b>GRADE Equity Guideline: Equity Extension of the Guideline Development (Akl et al., 2017)</b>                                                                                                                                 |                                                                                                                                              |                                                                                                        |                                                                                                                              |                                                                                                                           |                                                                               |                                                                                                            |                                                                                 |                                                                         |
| 1. Setting priorities                                                                                                                                                                                                           |                                                                                                                                              |                                                                                                        |                                                                                                                              |                                                                                                                           |                                                                               |                                                                                                            |                                                                                 |                                                                         |
| a. Dedicates part of or entire guideline to the care of disadvantaged populations                                                                                                                                               | no                                                                                                                                           | no                                                                                                     | no                                                                                                                           | no                                                                                                                        | no                                                                            | no                                                                                                         | no                                                                              | no                                                                      |
| 2. Guideline group membership<br>a. Includes representatives of the disadvantaged populations in the different guideline groups, particularly the voting panel                                                                  | no                                                                                                                                           | no                                                                                                     | no                                                                                                                           | no                                                                                                                        | not reported                                                                  | not reported                                                                                               | not reported                                                                    | not reported                                                            |
| <b>Response Options:</b> Yes, No, Not Reported, or N/A (Not Applicable)                                                                                                                                                         |                                                                                                                                              |                                                                                                        |                                                                                                                              |                                                                                                                           |                                                                               |                                                                                                            |                                                                                 |                                                                         |

| Evaluation Tools and Items                                                                                                                                                                                            | The Management and Rehabilitation of Post-Acute mTBI Work Group. (2021). VA/DoD CPG for the management and rehabilitation of post-acute mTBI | Giza et al. (2013). Evidence-based guideline update: Evaluation and management of concussion in sports | Trevena et al. 2004. Clinical practice guidelines for the care of people living with traumatic brain injury in the community | American Academy of Neurology (2003). Practice parameter: Antiepileptic drug prophylaxis in severe traumatic brain injury | Evans et al. (2022). Acute mild traumatic brain injury (concussion) in adults | Vavilala et al. (2021). Severe traumatic brain injury (TBI) in children: Initial evaluation and management | Lim et al. (2021). Sleep-wake disorders in patients with traumatic brain injury | Schutzman (2021). Minor head trauma in infants and children: Management |
|-----------------------------------------------------------------------------------------------------------------------------------------------------------------------------------------------------------------------|----------------------------------------------------------------------------------------------------------------------------------------------|--------------------------------------------------------------------------------------------------------|------------------------------------------------------------------------------------------------------------------------------|---------------------------------------------------------------------------------------------------------------------------|-------------------------------------------------------------------------------|------------------------------------------------------------------------------------------------------------|---------------------------------------------------------------------------------|-------------------------------------------------------------------------|
| b. Ensures the method for recruitment of group members considers representatives of all relevant disadvantaged populations                                                                                            | no                                                                                                                                           | no                                                                                                     | not reported                                                                                                                 | not reported                                                                                                              | not reported                                                                  | not reported                                                                                               | not reported                                                                    | not reported                                                            |
| c. Recruits a methodologist who is familiar with and mindful of equity issues                                                                                                                                         | no                                                                                                                                           | no                                                                                                     | not reported                                                                                                                 | not reported                                                                                                              | not reported                                                                  | not reported                                                                                               | not reported                                                                    | not reported                                                            |
| d. Ensures the chair of the voting panel is familiar with equity issues                                                                                                                                               | not reported                                                                                                                                 | not reported                                                                                           | not reported                                                                                                                 | not reported                                                                                                              | not reported                                                                  | not reported                                                                                               | not reported                                                                    | not reported                                                            |
| 3. Identifying the target audience(s)                                                                                                                                                                                 |                                                                                                                                              |                                                                                                        |                                                                                                                              |                                                                                                                           |                                                                               |                                                                                                            |                                                                                 |                                                                         |
| a. Specifies relevant disadvantaged populations when identifying the target audience(s)                                                                                                                               | no                                                                                                                                           | no                                                                                                     | no                                                                                                                           | no                                                                                                                        | no                                                                            | no                                                                                                         | no                                                                              | no                                                                      |
| b. Involves representatives of the disadvantaged populations when identifying the target audience(s)                                                                                                                  | no                                                                                                                                           | no                                                                                                     | no                                                                                                                           | no                                                                                                                        | no                                                                            | no                                                                                                         | no                                                                              | no                                                                      |
| 4. Generating the guideline questions                                                                                                                                                                                 |                                                                                                                                              |                                                                                                        |                                                                                                                              |                                                                                                                           |                                                                               |                                                                                                            |                                                                                 |                                                                         |
| a. Considers equity when specifying elements of the PICO questions                                                                                                                                                    | no                                                                                                                                           | no                                                                                                     | no                                                                                                                           | not reported                                                                                                              | not reported                                                                  | not reported                                                                                               | not reported                                                                    | not reported                                                            |
| b. Considers "good-practice statements" that could help address equity issues                                                                                                                                         | no                                                                                                                                           | no                                                                                                     | no                                                                                                                           | no                                                                                                                        | no                                                                            | no                                                                                                         | no                                                                              | no                                                                      |
| 5. Considers the importance of outcomes and interventions                                                                                                                                                             |                                                                                                                                              |                                                                                                        |                                                                                                                              |                                                                                                                           |                                                                               |                                                                                                            |                                                                                 |                                                                         |
| a. Involves representatives of disadvantaged populations in rating the importance of interventions and outcomes                                                                                                       | no                                                                                                                                           | no                                                                                                     | no                                                                                                                           | no                                                                                                                        | no                                                                            | no                                                                                                         | no                                                                              | no                                                                      |
| b. Searches selected databases for outcomes rated as important by disadvantaged populations                                                                                                                           | no                                                                                                                                           | no                                                                                                     | no                                                                                                                           | no                                                                                                                        | no                                                                            | no                                                                                                         | no                                                                              | no                                                                      |
| c. Considers separate recommendations for disadvantaged populations if their values and preferences are thought to differ substantively to the point of affecting the strength and/or direction of the recommendation | no                                                                                                                                           | no                                                                                                     | no                                                                                                                           | no                                                                                                                        | no                                                                            | no                                                                                                         | no                                                                              | no                                                                      |
| <b>Response Options:</b> Yes, No, Not Reported, or N/A (Not Applicable)                                                                                                                                               |                                                                                                                                              |                                                                                                        |                                                                                                                              |                                                                                                                           |                                                                               |                                                                                                            |                                                                                 |                                                                         |



| <p style="text-align: center;"><b>Evaluation Tools and Items</b></p>                                                       | <p style="text-align: center;">The Management and Rehabilitation of Post-Acute mTBI Work Group. (2021). VA/DoD CPG for the management and rehabilitation of post-acute mTBI</p> | <p style="text-align: center;">Giza et al. (2013). Evidence-based guideline update: Evaluation and management of concussion in sports</p> | <p style="text-align: center;">Trevena et al. 2004. Clinical practice guidelines for the care of people living with traumatic brain injury in the community</p> | <p style="text-align: center;">American Academy of Neurology (2003). Practice parameter: Antiepileptic drug prophylaxis in severe traumatic brain injury</p> | <p style="text-align: center;">Evans et al. (2022). Acute mild traumatic brain injury (concussion) in adults</p> | <p style="text-align: center;">Vavilala et al. (2021). Severe traumatic brain injury (TBI) in children: Initial evaluation and management</p> | <p style="text-align: center;">Lim et al. (2021). Sleep-wake disorders in patients with traumatic brain injury</p> | <p style="text-align: center;">Schutzman (2021). Minor head trauma in infants and children: Management</p> |
|----------------------------------------------------------------------------------------------------------------------------|---------------------------------------------------------------------------------------------------------------------------------------------------------------------------------|-------------------------------------------------------------------------------------------------------------------------------------------|-----------------------------------------------------------------------------------------------------------------------------------------------------------------|--------------------------------------------------------------------------------------------------------------------------------------------------------------|------------------------------------------------------------------------------------------------------------------|-----------------------------------------------------------------------------------------------------------------------------------------------|--------------------------------------------------------------------------------------------------------------------|------------------------------------------------------------------------------------------------------------|
| <p>9. Evaluation and use</p> <p>a. Produces tools to facilitate implementation and use among disadvantaged populations</p> | no                                                                                                                                                                              | no                                                                                                                                        | yes                                                                                                                                                             | no                                                                                                                                                           | no                                                                                                               | no                                                                                                                                            | no                                                                                                                 | no                                                                                                         |
| <p>b. Monitors and audits implementation and use among disadvantaged populations</p>                                       | no                                                                                                                                                                              | no                                                                                                                                        | no                                                                                                                                                              | no                                                                                                                                                           | no                                                                                                               | no                                                                                                                                            | no                                                                                                                 | no                                                                                                         |
| <p><b>Response Options:</b> Yes, No, Not Reported, or N/A (Not Applicable)</p>                                             |                                                                                                                                                                                 |                                                                                                                                           |                                                                                                                                                                 |                                                                                                                                                              |                                                                                                                  |                                                                                                                                               |                                                                                                                    |                                                                                                            |

|                                                                                                                                                                                                                                        |                                                                                 |                                                 |                                                                                                                                                                               |                                                                                                                                                                |                                                                                                                                   |                                                                                                                                          |                                                                                                                                              |
|----------------------------------------------------------------------------------------------------------------------------------------------------------------------------------------------------------------------------------------|---------------------------------------------------------------------------------|-------------------------------------------------|-------------------------------------------------------------------------------------------------------------------------------------------------------------------------------|----------------------------------------------------------------------------------------------------------------------------------------------------------------|-----------------------------------------------------------------------------------------------------------------------------------|------------------------------------------------------------------------------------------------------------------------------------------|----------------------------------------------------------------------------------------------------------------------------------------------|
| <p align="center"><b>Evaluation Tools and Items</b></p>                                                                                                                                                                                | <p>Meehan et al. (2022). Concussion in children and adolescents: Management</p> | <p>Schytz. (2021). Post-traumatic headache.</p> | <p>Luaute et al. (2016). Care management of the agitation or aggressiveness crisis in patients with TBI. Systematic review of the literature and practice recommendations</p> | <p>Tan et al. (2017). The screening and management of pituitary dysfunction following traumatic brain injury in adults: British Neurotrauma Group guidance</p> | <p>Rytter et al. (2021). National clinical guideline for non-pharmacological treatment of long term symptoms after concussion</p> | <p>Pottie et al. (2020). Clinical guideline for homeless and vulnerably housed people, and people with lived homelessness experience</p> | <p>National Institute for Health and Clinical Excellence. (2022). Integrated health and social care for people experiencing homelessness</p> |
| <p><b>Assessing Equity in Clinical Practice Guidelines (Dans et al., 2007)</b></p>                                                                                                                                                     |                                                                                 |                                                 |                                                                                                                                                                               |                                                                                                                                                                |                                                                                                                                   |                                                                                                                                          |                                                                                                                                              |
| <p>1. Discusses the burden of disease in disadvantaged Populations</p>                                                                                                                                                                 | <p align="center">no</p>                                                        | <p align="center">no</p>                        | <p align="center">no</p>                                                                                                                                                      | <p align="center">no</p>                                                                                                                                       | <p align="center">no</p>                                                                                                          | <p align="center">yes</p>                                                                                                                | <p align="center">yes</p>                                                                                                                    |
| <p>2. Discusses differences between disadvantaged and privileged populations, in terms of the biology of the disease, adherence, and baseline risks</p>                                                                                | <p align="center">no</p>                                                        | <p align="center">no</p>                        | <p align="center">no</p>                                                                                                                                                      | <p align="center">no</p>                                                                                                                                       | <p align="center">no</p>                                                                                                          | <p align="center">no</p>                                                                                                                 | <p align="center">yes</p>                                                                                                                    |
| <p>3. Values [of the intervention/outcome] assessed in guideline development panels through consultations with disadvantaged populations, involvement of their caregivers, reference to relevant search, or transparent reflection</p> | <p align="center">no</p>                                                        | <p align="center">no</p>                        | <p align="center">no</p>                                                                                                                                                      | <p align="center">no</p>                                                                                                                                       | <p align="center">no</p>                                                                                                          | <p align="center">yes</p>                                                                                                                | <p align="center">yes</p>                                                                                                                    |
| <p>4. Discusses barriers to implementation in disadvantaged populations, and identifies strategies to overcome these barriers</p>                                                                                                      | <p align="center">no</p>                                                        | <p align="center">no</p>                        | <p align="center">no</p>                                                                                                                                                      | <p align="center">no</p>                                                                                                                                       | <p align="center">no</p>                                                                                                          | <p align="center">yes</p>                                                                                                                | <p align="center">yes</p>                                                                                                                    |
| <p>5. Plans for monitoring disadvantaged groups according to PROGRESS-plus elements</p>                                                                                                                                                | <p align="center">no</p>                                                        | <p align="center">no</p>                        | <p align="center">no</p>                                                                                                                                                      | <p align="center">no</p>                                                                                                                                       | <p align="center">no</p>                                                                                                          | <p align="center">no</p>                                                                                                                 | <p align="center">yes</p>                                                                                                                    |
| <p><b>GRADE Equity Guideline: Equity Extension of the Guideline Development (Akl et al., 2017)</b></p>                                                                                                                                 |                                                                                 |                                                 |                                                                                                                                                                               |                                                                                                                                                                |                                                                                                                                   |                                                                                                                                          |                                                                                                                                              |
| <p>1. Setting priorities<br/>a. Dedicates part of or entire guideline to the care of disadvantaged populations</p>                                                                                                                     | <p align="center">no</p>                                                        | <p align="center">no</p>                        | <p align="center">no</p>                                                                                                                                                      | <p align="center">no</p>                                                                                                                                       | <p align="center">no</p>                                                                                                          | <p align="center">yes</p>                                                                                                                | <p align="center">yes</p>                                                                                                                    |
| <p>2. Guideline group membership<br/>a. Includes representatives of the disadvantaged populations in the different guideline groups, particularly the voting panel</p>                                                                 | <p align="center">not reported</p>                                              | <p align="center">not reported</p>              | <p align="center">yes</p>                                                                                                                                                     | <p align="center">no</p>                                                                                                                                       | <p align="center">no</p>                                                                                                          | <p align="center">yes</p>                                                                                                                | <p align="center">yes</p>                                                                                                                    |
| <p><b>Response Options:</b> Yes, No, Not Reported, or N/A (Not Applicable)</p>                                                                                                                                                         |                                                                                 |                                                 |                                                                                                                                                                               |                                                                                                                                                                |                                                                                                                                   |                                                                                                                                          |                                                                                                                                              |

| Evaluation Tools and Items                                                                                                                                                                                            | Meehan et al. (2022). Concussion in children and adolescents: Management | Schytz. (2021). Post-traumatic headache. | Luaute et al. (2016). Care management of the agitation or aggression crisis in patients with TBI. Systematic review of the literature and practice recommendations | Tan et al. (2017). The screening and management of pituitary dysfunction following traumatic brain injury in adults: British Neurotrauma Group guidance | Rytter et al. (2021). National clinical guideline for non-pharmacological treatment of long term symptoms after concussion | Pottie et al. (2020). Clinical guideline for homeless and vulnerably housed people, and people with lived homelessness experience | National Institute for Health and Clinical Excellence. (2022). Integrated health and social care for people experiencing homelessness |
|-----------------------------------------------------------------------------------------------------------------------------------------------------------------------------------------------------------------------|--------------------------------------------------------------------------|------------------------------------------|--------------------------------------------------------------------------------------------------------------------------------------------------------------------|---------------------------------------------------------------------------------------------------------------------------------------------------------|----------------------------------------------------------------------------------------------------------------------------|-----------------------------------------------------------------------------------------------------------------------------------|---------------------------------------------------------------------------------------------------------------------------------------|
| b. Ensures the method for recruitment of group members considers representatives of all relevant disadvantaged populations                                                                                            | not reported                                                             | not reported                             | not reported                                                                                                                                                       | not reported                                                                                                                                            | not reported                                                                                                               | not reported                                                                                                                      | not reported                                                                                                                          |
| c. Recruits a methodologist who is familiar with and mindful of equity issues                                                                                                                                         | not reported                                                             | not reported                             | no                                                                                                                                                                 | not reported                                                                                                                                            | not reported                                                                                                               | not reported                                                                                                                      | not reported                                                                                                                          |
| d. Ensures the chair of the voting panel is familiar with equity issues                                                                                                                                               | not reported                                                             | not reported                             | not reported                                                                                                                                                       | not reported                                                                                                                                            | not reported                                                                                                               | not reported                                                                                                                      | yes                                                                                                                                   |
| 3. Identifying the target audience(s)                                                                                                                                                                                 |                                                                          |                                          |                                                                                                                                                                    |                                                                                                                                                         |                                                                                                                            |                                                                                                                                   |                                                                                                                                       |
| a. Specifies relevant disadvantaged populations when identifying the target audience(s)                                                                                                                               | no                                                                       | no                                       | no                                                                                                                                                                 | no                                                                                                                                                      | no                                                                                                                         | no                                                                                                                                | yes                                                                                                                                   |
| b. Involves representatives of the disadvantaged populations when identifying the target audience(s)                                                                                                                  | no                                                                       | no                                       | no                                                                                                                                                                 | no                                                                                                                                                      | not reported                                                                                                               | no                                                                                                                                | yes                                                                                                                                   |
| 4. Generating the guideline questions                                                                                                                                                                                 |                                                                          |                                          |                                                                                                                                                                    |                                                                                                                                                         |                                                                                                                            |                                                                                                                                   |                                                                                                                                       |
| a. Considers equity when specifying elements of the PICO questions                                                                                                                                                    | no                                                                       | not reported                             | not reported                                                                                                                                                       | not reported                                                                                                                                            | no                                                                                                                         | yes                                                                                                                               | yes                                                                                                                                   |
| b. Considers "good-practice statements" that could help address equity issues                                                                                                                                         | no                                                                       | no                                       | no                                                                                                                                                                 | no                                                                                                                                                      | no                                                                                                                         | yes                                                                                                                               | no                                                                                                                                    |
| 5. Considers the importance of outcomes and interventions                                                                                                                                                             |                                                                          |                                          |                                                                                                                                                                    |                                                                                                                                                         |                                                                                                                            |                                                                                                                                   |                                                                                                                                       |
| a. Involves representatives of disadvantaged populations in rating the importance of interventions and outcomes                                                                                                       | no                                                                       | no                                       | no                                                                                                                                                                 | no                                                                                                                                                      | no                                                                                                                         | yes                                                                                                                               | yes                                                                                                                                   |
| b. Searches selected databases for outcomes rated as important by disadvantaged populations                                                                                                                           | no                                                                       | no                                       | no                                                                                                                                                                 | no                                                                                                                                                      | no                                                                                                                         | yes                                                                                                                               | yes                                                                                                                                   |
| c. Considers separate recommendations for disadvantaged populations if their values and preferences are thought to differ substantively to the point of affecting the strength and/or direction of the recommendation | no                                                                       | no                                       | no                                                                                                                                                                 | no                                                                                                                                                      | no                                                                                                                         | yes                                                                                                                               | n/a                                                                                                                                   |
| <b>Response Options:</b> Yes, No, Not Reported, or N/A (Not Applicable)                                                                                                                                               |                                                                          |                                          |                                                                                                                                                                    |                                                                                                                                                         |                                                                                                                            |                                                                                                                                   |                                                                                                                                       |



| <p style="text-align: center;"><b>Evaluation Tools and Items</b></p>                                                                                                                                                                                                                                                                                                                                                                                                                                                                                                                                                                                                                                                                                                                                                                                                                                                                                                                                                                                                                                                                                                                                                                                                                                                                                                                             | <p style="text-align: center;">Meehan et al. (2022). Concussion in children and adolescents: Management</p>                                                                                                                                                                                                                                                                                                                                        | <p style="text-align: center;">Schytz. (2021). Post-traumatic headache.</p>                                                                                                                                                                                                                                                                                                                                | <p style="text-align: center;">Luaute et al. (2016). Care management of the agitation or aggressiveness crisis in patients with TBI. Systematic review of the literature and practice recommendations</p>                                                                                                                                                 | <p style="text-align: center;">Tan et al. (2017). The screening and management of pituitary dysfunction following traumatic brain injury in adults: British Neurotrauma Group guidance</p>                                                                                                                                                                | <p style="text-align: center;">Rytter et al. (2021). National clinical guideline for non-pharmacological treatment of long term symptoms after concussion</p>                                                                                                                                                                                                      | <p style="text-align: center;">Pottie et al. (2020). Clinical guideline for homeless and vulnerably housed people, and people with lived homelessness experience</p>                                                                                                                                                                                                    | <p style="text-align: center;">National Institute for Health and Clinical Excellence. (2022). Integrated health and social care for people experiencing homelessness</p>                                                                                                                                              |
|--------------------------------------------------------------------------------------------------------------------------------------------------------------------------------------------------------------------------------------------------------------------------------------------------------------------------------------------------------------------------------------------------------------------------------------------------------------------------------------------------------------------------------------------------------------------------------------------------------------------------------------------------------------------------------------------------------------------------------------------------------------------------------------------------------------------------------------------------------------------------------------------------------------------------------------------------------------------------------------------------------------------------------------------------------------------------------------------------------------------------------------------------------------------------------------------------------------------------------------------------------------------------------------------------------------------------------------------------------------------------------------------------|----------------------------------------------------------------------------------------------------------------------------------------------------------------------------------------------------------------------------------------------------------------------------------------------------------------------------------------------------------------------------------------------------------------------------------------------------|------------------------------------------------------------------------------------------------------------------------------------------------------------------------------------------------------------------------------------------------------------------------------------------------------------------------------------------------------------------------------------------------------------|-----------------------------------------------------------------------------------------------------------------------------------------------------------------------------------------------------------------------------------------------------------------------------------------------------------------------------------------------------------|-----------------------------------------------------------------------------------------------------------------------------------------------------------------------------------------------------------------------------------------------------------------------------------------------------------------------------------------------------------|--------------------------------------------------------------------------------------------------------------------------------------------------------------------------------------------------------------------------------------------------------------------------------------------------------------------------------------------------------------------|-------------------------------------------------------------------------------------------------------------------------------------------------------------------------------------------------------------------------------------------------------------------------------------------------------------------------------------------------------------------------|-----------------------------------------------------------------------------------------------------------------------------------------------------------------------------------------------------------------------------------------------------------------------------------------------------------------------|
| <p>6. Deciding what evidence to include and searching for evidence</p> <p>a. Seeks evidence specific to disadvantaged populations, for example, baseline risks specific to those groups</p> <p>b. Considers including evidence derived from fields other than health (e.g., social science) that address disadvantaged populations</p> <p>c. Searches literature published in the language relevant to the disadvantaged population</p> <p>7. Summarizing the evidence and considering additional information</p> <p>a. Considers the PROGRESS-plus elements when synthesizing the evidence</p> <p>b. Follows the PRISMA-equity statement when reporting the systematic reviews</p> <p>c. Considers information on resource use, cost, effect on equity, feasibility, and acceptability from the perspective of disadvantaged populations</p> <p>8. Wording of recommendations</p> <p>a. Specific in defining the population to maximize the understanding that it applies to a disadvantaged population (when applicable)</p> <p>b. Includes the necessary remarks following the recommendation to ensure its appropriate implementation in disadvantaged populations</p> <p>c. Ensures that the language is used carefully so that the recommendation does not stigmatize already disadvantaged populations</p> <p><b>Response Options:</b> Yes, No, Not Reported, or N/A (Not Applicable)</p> | <p style="text-align: center;">no</p> <p style="text-align: center;">no</p> <p style="text-align: center;">n/a</p> <p style="text-align: center;">yes</p> <p style="text-align: center;">not reported</p> <p style="text-align: center;">no</p> <p style="text-align: center;">n/a</p> | <p style="text-align: center;">no</p> <p style="text-align: center;">no</p> <p style="text-align: center;">n/a</p> <p style="text-align: center;">yes</p> <p style="text-align: center;">not reported</p> <p style="text-align: center;">no</p> <p style="text-align: center;">no</p> <p style="text-align: center;">n/a</p> <p style="text-align: center;">n/a</p> <p style="text-align: center;">n/a</p> | <p style="text-align: center;">no</p> <p style="text-align: center;">no</p> <p style="text-align: center;">n/a</p> <p style="text-align: center;">no</p> <p style="text-align: center;">no</p> <p style="text-align: center;">no</p> <p style="text-align: center;">n/a</p> <p style="text-align: center;">n/a</p> <p style="text-align: center;">n/a</p> | <p style="text-align: center;">no</p> <p style="text-align: center;">no</p> <p style="text-align: center;">n/a</p> <p style="text-align: center;">no</p> <p style="text-align: center;">no</p> <p style="text-align: center;">no</p> <p style="text-align: center;">n/a</p> <p style="text-align: center;">n/a</p> <p style="text-align: center;">n/a</p> | <p style="text-align: center;">no</p> <p style="text-align: center;">no</p> <p style="text-align: center;">no</p> <p style="text-align: center;">no</p> <p style="text-align: center;">not reported</p> <p style="text-align: center;">no</p> <p style="text-align: center;">n/a</p> <p style="text-align: center;">n/a</p> <p style="text-align: center;">n/a</p> | <p style="text-align: center;">yes</p> <p style="text-align: center;">yes</p> <p style="text-align: center;">yes</p> <p style="text-align: center;">yes</p> <p style="text-align: center;">not reported</p> <p style="text-align: center;">yes</p> <p style="text-align: center;">yes</p> <p style="text-align: center;">yes</p> <p style="text-align: center;">yes</p> | <p style="text-align: center;">yes</p> <p style="text-align: center;">yes</p> <p style="text-align: center;">no</p> <p style="text-align: center;">yes</p> <p style="text-align: center;">no</p> <p style="text-align: center;">yes</p> <p style="text-align: center;">yes</p> <p style="text-align: center;">yes</p> |

|                                                                                                                                                                                                                                                                                            |                                                                                 |                                                   |                                                                                                                                                                               |                                                                                                                                                                |                                                                                                                                   |                                                                                                                                          |                                                                                                                                              |
|--------------------------------------------------------------------------------------------------------------------------------------------------------------------------------------------------------------------------------------------------------------------------------------------|---------------------------------------------------------------------------------|---------------------------------------------------|-------------------------------------------------------------------------------------------------------------------------------------------------------------------------------|----------------------------------------------------------------------------------------------------------------------------------------------------------------|-----------------------------------------------------------------------------------------------------------------------------------|------------------------------------------------------------------------------------------------------------------------------------------|----------------------------------------------------------------------------------------------------------------------------------------------|
| <p align="center"><b>Evaluation Tools and Items</b></p>                                                                                                                                                                                                                                    | <p>Meehan et al. (2022). Concussion in children and adolescents: Management</p> | <p>Schytz. (2021). Post-traumatic headache.</p>   | <p>Luaute et al. (2016). Care management of the agitation or aggressiveness crisis in patients with TBI. Systematic review of the literature and practice recommendations</p> | <p>Tan et al. (2017). The screening and management of pituitary dysfunction following traumatic brain injury in adults: British Neurotrauma Group guidance</p> | <p>Rytter et al. (2021). National clinical guideline for non-pharmacological treatment of long term symptoms after concussion</p> | <p>Pottie et al. (2020). Clinical guideline for homeless and vulnerably housed people, and people with lived homelessness experience</p> | <p>National Institute for Health and Clinical Excellence. (2022). Integrated health and social care for people experiencing homelessness</p> |
| <p>9. Evaluation and use<br/> a. Produces tools to facilitate implementation and use among disadvantaged populations<br/> b. Monitors and audits implementation and use among disadvantaged populations</p> <p><b>Response Options:</b> Yes, No, Not Reported, or N/A (Not Applicable)</p> | <p align="center">no</p> <p align="center">no</p>                               | <p align="center">no</p> <p align="center">no</p> | <p align="center">no</p> <p align="center">no</p>                                                                                                                             | <p align="center">no</p> <p align="center">no</p>                                                                                                              | <p align="center">no</p> <p align="center">no</p>                                                                                 | <p align="center">yes</p> <p align="center">no</p>                                                                                       | <p align="center">yes</p> <p align="center">no</p>                                                                                           |

## Supplementary File 5. Chart Summarizing Quality Appraisal Findings

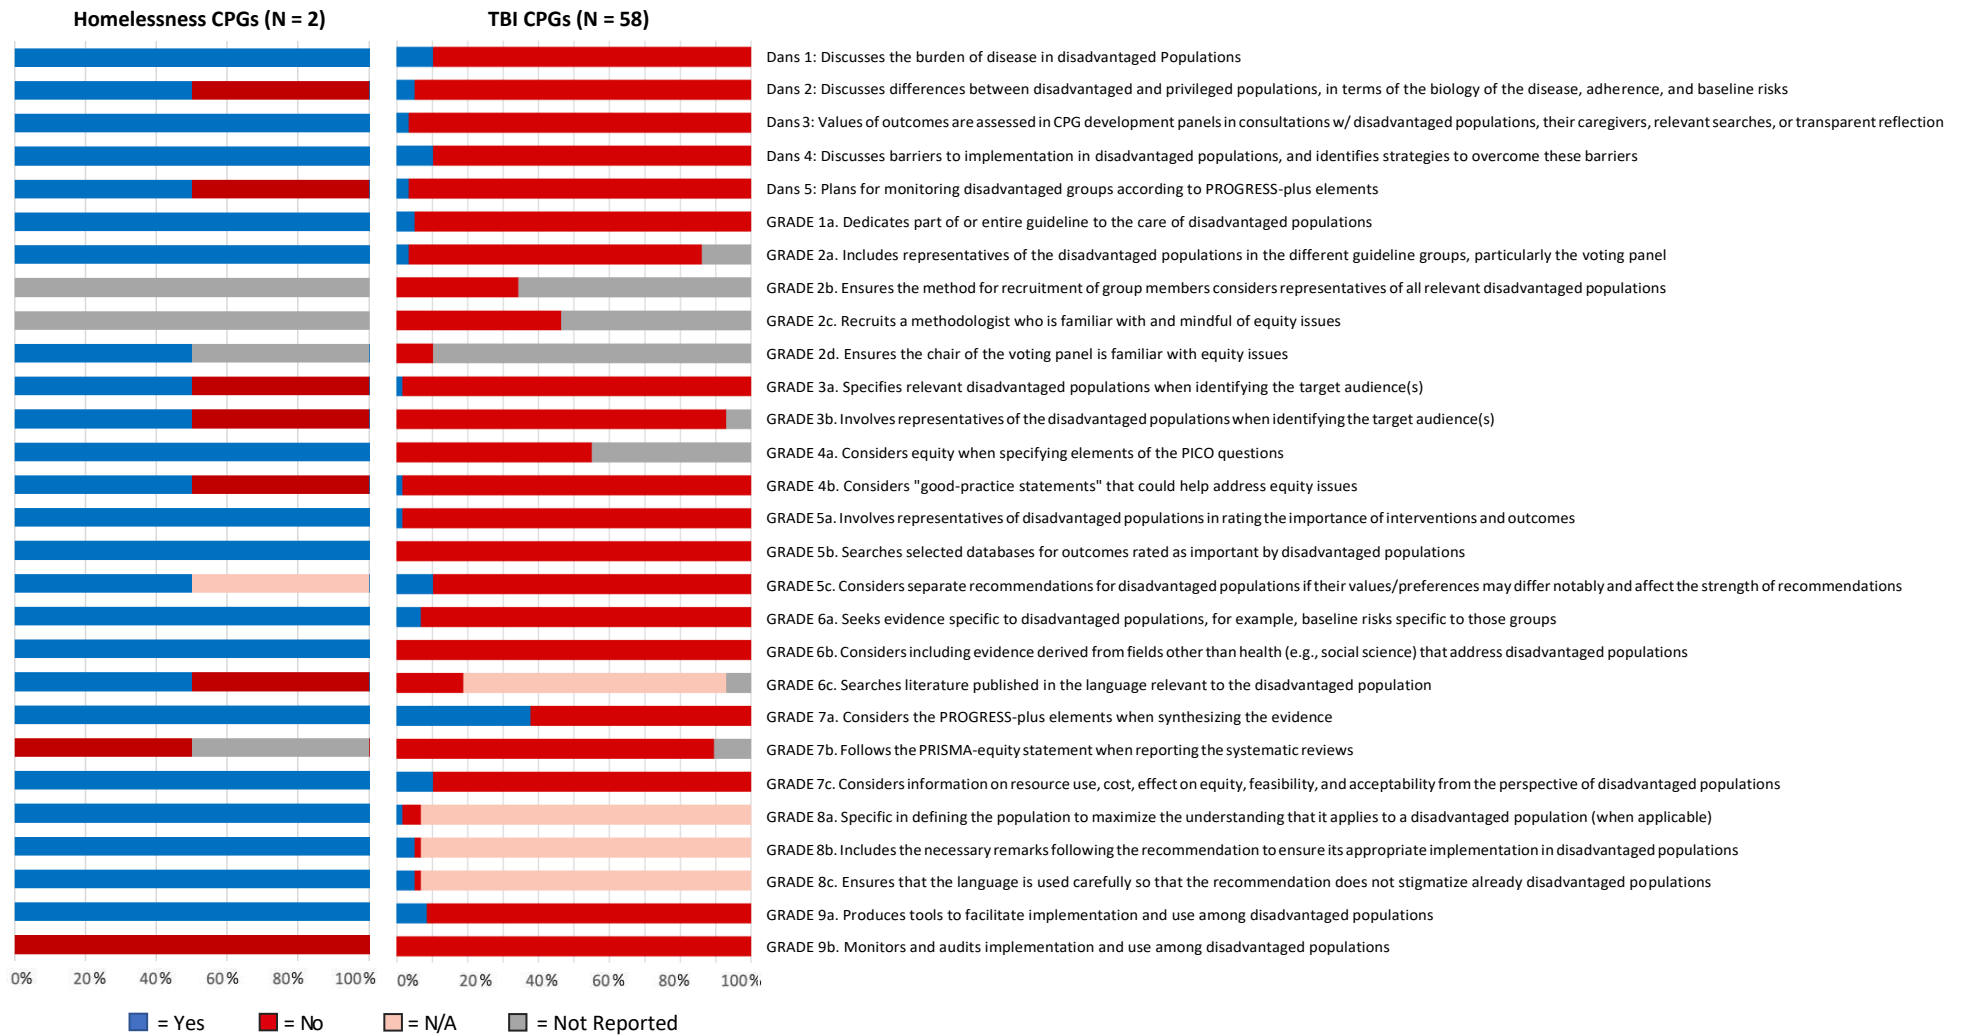

Supplement: mmc1.pdf [file mmc1.pdf]
