# Supplementary material for: Equity considerations in clinical practice guidelines for traumatic brain injury and homelessness: a systematic review
Source: PubMed Central journal article supplement — eClinicalMedicine. 2023 Aug 24;63:102152. doi: 10.1016/j.eclinm.2023.102152 (PMC10474365; doi:10.1016/j.eclinm.2023.102152), 2023-08-24
Supplement: mmc3.pdf [file mmc3.pdf]

**Supplementary Table 1. PICAR Statement of Study Eligibility Criteria**

|                                                                     | <b>Clinical Practice Guidelines for Traumatic Brain Injury</b>                                                                                                                                                                                                                                                                                                                                                                                                                                                                         | <b>Clinical Practice Guidelines for Homelessness</b>                                                                                                                                     |
|---------------------------------------------------------------------|----------------------------------------------------------------------------------------------------------------------------------------------------------------------------------------------------------------------------------------------------------------------------------------------------------------------------------------------------------------------------------------------------------------------------------------------------------------------------------------------------------------------------------------|------------------------------------------------------------------------------------------------------------------------------------------------------------------------------------------|
| <b>INCLUSION CRITERIA</b>                                           |                                                                                                                                                                                                                                                                                                                                                                                                                                                                                                                                        |                                                                                                                                                                                          |
| <b>P: Population, clinical indicator(s), and conditions(s)</b>      | - TBI of any cause and injury severity                                                                                                                                                                                                                                                                                                                                                                                                                                                                                                 | - Individuals experiencing homelessness<br>- Individuals with lived experience of homelessness<br>- Individuals at risk of homelessness                                                  |
| <b>I: Intervention(s)</b>                                           | Any intervention                                                                                                                                                                                                                                                                                                                                                                                                                                                                                                                       |                                                                                                                                                                                          |
| <b>C: Comparator(s), Comparison(s), and (Key) Content</b>           | Any comparator or comparison, no 'key' CPG content is of interest (i.e., all content will be considered)                                                                                                                                                                                                                                                                                                                                                                                                                               |                                                                                                                                                                                          |
| <b>A: Attributes of CPG</b>                                         | <ul style="list-style-type: none"> <li>- CPGs are explicitly evidence-based (i.e., CPG must show evidence a literature search was performed)</li> <li>- Only the latest version of the CPG will be considered</li> <li>- The complete CPG must be available</li> </ul> <p>No restrictions based on other attributes such as language, year of publication, country of publication, age (e.g., paediatrics, adults), population (e.g., veterans, athletes), setting (e.g., rehabilitation, acute care, shelters), intended end-user</p> |                                                                                                                                                                                          |
| <b>R: Recommendation Characteristics and "Other" Considerations</b> | <ul style="list-style-type: none"> <li>- At least one evidence-based recommendation must be included</li> <li>- CPG must use a system to rate the level of evidence behind the recommendation and the appraisal tool must be specified</li> </ul>                                                                                                                                                                                                                                                                                      |                                                                                                                                                                                          |
| <b>EXCLUSION CRITERIA</b>                                           |                                                                                                                                                                                                                                                                                                                                                                                                                                                                                                                                        |                                                                                                                                                                                          |
| <b>P: Population, clinical indicator(s), and conditions(s)</b>      | - CPGs focused on the broader brain-injured population (e.g., acquired brain injury) or individuals with cognitive impairment without specific recommendation(s) for TBI                                                                                                                                                                                                                                                                                                                                                               | - CPGs not explicitly stated as being for homelessness, individuals experiencing homelessness, individuals with lived experience of homelessness, or individuals at risk of homelessness |
| <b>I: Intervention(s)</b>                                           | N/A                                                                                                                                                                                                                                                                                                                                                                                                                                                                                                                                    |                                                                                                                                                                                          |
| <b>C: Comparator(s), Comparison(s), and (Key) Content</b>           | N/A                                                                                                                                                                                                                                                                                                                                                                                                                                                                                                                                    |                                                                                                                                                                                          |
| <b>A: Attributes of CPG</b>                                         | <ul style="list-style-type: none"> <li>- Summaries of guidelines, editorials</li> <li>- Adaptations of existing guidelines for audiences other than intended end-user (e.g., guidelines for practitioners adapted for patients), translation of guideline</li> </ul>                                                                                                                                                                                                                                                                   |                                                                                                                                                                                          |
| <b>R: Recommendation Characteristics and "Other" Considerations</b> | - Recommendations are not rated and are not based on evidence from the literature                                                                                                                                                                                                                                                                                                                                                                                                                                                      |                                                                                                                                                                                          |

CPG: Clinical practice guideline; N/A: Not applicable; TBI: Traumatic brain injury

**Supplementary Table 2. Keywords and definitions for traumatic brain injury and homelessness.**

| <b>Traumatic Brain Injury</b>                                                                                                                                                                                                                                                                                                                                                                                                                                                                                                                                                                                                                                                                                                                                                                                                                                                                                                                                                                                                                                                                                                                                                                                                                                                                                                                                                                                                                                                                                                                              |
|------------------------------------------------------------------------------------------------------------------------------------------------------------------------------------------------------------------------------------------------------------------------------------------------------------------------------------------------------------------------------------------------------------------------------------------------------------------------------------------------------------------------------------------------------------------------------------------------------------------------------------------------------------------------------------------------------------------------------------------------------------------------------------------------------------------------------------------------------------------------------------------------------------------------------------------------------------------------------------------------------------------------------------------------------------------------------------------------------------------------------------------------------------------------------------------------------------------------------------------------------------------------------------------------------------------------------------------------------------------------------------------------------------------------------------------------------------------------------------------------------------------------------------------------------------|
| <p><u>Keywords:</u><br/>brain injury or concussion or brain trauma or head injury or head trauma</p>                                                                                                                                                                                                                                                                                                                                                                                                                                                                                                                                                                                                                                                                                                                                                                                                                                                                                                                                                                                                                                                                                                                                                                                                                                                                                                                                                                                                                                                       |
| <p><u>Definition</u><sup>1</sup>:<br/>An alteration in brain function, or other evidence of brain pathology, caused by an external force</p>                                                                                                                                                                                                                                                                                                                                                                                                                                                                                                                                                                                                                                                                                                                                                                                                                                                                                                                                                                                                                                                                                                                                                                                                                                                                                                                                                                                                               |
| <b>Homelessness</b>                                                                                                                                                                                                                                                                                                                                                                                                                                                                                                                                                                                                                                                                                                                                                                                                                                                                                                                                                                                                                                                                                                                                                                                                                                                                                                                                                                                                                                                                                                                                        |
| <p><u>Keywords:</u><br/>homelessness or roofless or marginally housed or precariously housed or unstably housed or provisionally accommodated or houseless or shelters</p>                                                                                                                                                                                                                                                                                                                                                                                                                                                                                                                                                                                                                                                                                                                                                                                                                                                                                                                                                                                                                                                                                                                                                                                                                                                                                                                                                                                 |
| <p><u>Definitions of typology of homelessness that encompasses the following physical living situations</u><sup>2</sup>:</p>                                                                                                                                                                                                                                                                                                                                                                                                                                                                                                                                                                                                                                                                                                                                                                                                                                                                                                                                                                                                                                                                                                                                                                                                                                                                                                                                                                                                                               |
| <ul style="list-style-type: none"><li>a) Unsheltered: Individuals who lack housing and are not accessing shelters<ul style="list-style-type: none"><li>- Public or private spaces without consent or contract</li><li>- Places not intended for permanent human habitation</li></ul></li><li>b) Emergency sheltered: Individuals who cannot secure permanent housing and are accessing shelters or other system supports<ul style="list-style-type: none"><li>- Emergency overnight shelters for people who are homeless</li><li>- Shelters for individuals/families impacted by family violence</li><li>- Emergency shelter for people fleeing a natural disaster or destruction of accommodations due to fires, floods, etc.</li></ul></li><li>c) Provisionally accommodated: Individuals without permanent shelter and are accessing accommodations that offer no prospect of permanence<ul style="list-style-type: none"><li>- Interim housing</li><li>- Living temporarily with others</li><li>- Accessing short-term, temporary rental without security of tenure</li><li>- Living in institutional care and lack housing arrangements</li><li>- Accommodation/reception centres for recently arrived immigrants and refugees</li></ul></li><li>d) At risk of homelessness: Individuals or families whose current housing situations are dangerously lacking security or stability<ul style="list-style-type: none"><li>- People at imminent risk of homelessness</li><li>- Individuals and families who are precariously housed</li></ul></li></ul> |

**Supplementary Table 3. Synthesis of text-positive and text-negative CPGs.**

| <b>CPGs for TBI</b>          |                                                                                                                                                                                                                                                                                                                                                                                                                                                                                                                                                                                                                                 |
|------------------------------|---------------------------------------------------------------------------------------------------------------------------------------------------------------------------------------------------------------------------------------------------------------------------------------------------------------------------------------------------------------------------------------------------------------------------------------------------------------------------------------------------------------------------------------------------------------------------------------------------------------------------------|
| Text-Positive CPGs           | <p>Category 1: Guideline specifically recommends evidence-based diagnostic, management, or treatment approaches for individuals experiencing homelessness or with lived experience of homelessness</p> <p>Category 2: Guideline acknowledges or makes reference to data (e.g., epidemiologic, risk factors, outcome) regarding individuals experiencing homelessness or with lived experience of homelessness only, without recommendation</p> <p>Category 3: Guideline mentions individuals experiencing homelessness or with lived experience of homelessness without context related to the literature or recommendation</p> |
| Text-Negative CPGs           | <p>Category 1: Reference lists contain articles that include keywords for homelessness but the text of the guideline does not contain any keywords for or content consistent with the definition of homelessness</p> <p>Category 2: No article in the reference list includes keywords for homelessness</p>                                                                                                                                                                                                                                                                                                                     |
| <b>CPGs for Homelessness</b> |                                                                                                                                                                                                                                                                                                                                                                                                                                                                                                                                                                                                                                 |
| Text-Positive CPGs           | <p>Category 1: Guideline specifically recommends evidence-based diagnostic, management, or treatment approaches for individuals with TBI</p> <p>Category 2: Guideline acknowledges or makes reference to data (e.g., epidemiologic, risk factors, outcome) regarding individuals with TBI only, without recommendation</p> <p>Category 3: Guideline mentions individuals with TBI without context related to the literature or recommendation</p>                                                                                                                                                                               |
| Text-Negative CPGs           | <p>Category 1: Reference lists contain articles that include keywords for TBI but the text of the guideline does not contain any keywords for or content consistent with the definition of TBI</p> <p>Category 2: No article in the reference list includes keywords for TBI</p>                                                                                                                                                                                                                                                                                                                                                |

CPGs: Clinical practice guidelines; TBI: Traumatic brain injury

**Supplementary Table 4. Tabulation addressing the three research objectives.**

| <b>Objective</b>                                                             | <b>Definition and Tabulation Formula</b>                                                                                                                                                                 |
|------------------------------------------------------------------------------|----------------------------------------------------------------------------------------------------------------------------------------------------------------------------------------------------------|
| 1. Extent to which evidence about homelessness is integrated in CPGs for TBI | Proportion of text-positive guidelines for TBI = Number of guidelines for TBI that was text-positive divided by the total number of guidelines for TBI included in the review                            |
| 2. Extent to which evidence about TBI is integrated in CPGs for homelessness | Proportion of text-positive guidelines for homelessness = Number of guidelines for homelessness that was text-positive divided by the total number of guidelines for homelessness included in the review |
| 3. Equity considerations in CPGs for TBI and homelessness                    | Proportion of CPGs that considered equity = Number of guidelines that considered equity divided by the total number of guidelines included in the review                                                 |

**Supplementary Table 5. Characteristics of the CPGs**

| Characteristics of all CPGs (N=60)                                                                         | N (%)     |
|------------------------------------------------------------------------------------------------------------|-----------|
| <b>Year of Publication</b>                                                                                 |           |
| 2000-2004 <sup>3-5</sup>                                                                                   | 3 (5.0)   |
| 2005-2009 <sup>6-12</sup>                                                                                  | 7 (11.7)  |
| 2010-2014 <sup>13-23</sup>                                                                                 | 11 (18.3) |
| 2015-2019 <sup>24-44</sup>                                                                                 | 21 (35.0) |
| 2020-2023 <sup>45-69</sup>                                                                                 | 18 (30.0) |
| <b>Country</b>                                                                                             |           |
| Australia <sup>5, 9, 17, 36</sup>                                                                          | 4 (6.7)   |
| Canada <sup>18, 19, 23, 35, 37, 38, 45, 49, 50, 60</sup>                                                   | 10 (16.7) |
| France <sup>4, 28, 32, 33</sup>                                                                            | 4 (6.7)   |
| Italy <sup>27</sup>                                                                                        | 1 (1.7)   |
| New Zealand <sup>10</sup>                                                                                  | 1 (1.7)   |
| Scotland <sup>11</sup>                                                                                     | 1 (1.7)   |
| Taiwan <sup>8</sup>                                                                                        | 1 (1.7)   |
| United Kingdom <sup>15, 16, 40, 59</sup>                                                                   | 4 (6.7)   |
| United States <sup>3, 6, 7, 12-14, 22, 26, 29-31, 34, 39, 41-44, 46-48, 51-58, 61</sup>                    | 28 (46.7) |
| International partnerships                                                                                 | 6 (10.0)  |
| Canada and United States <sup>24</sup>                                                                     | 1 (1.7)   |
| Canada, United States, and Australia <sup>63-69</sup>                                                      | 1 (1.7)   |
| Scandinavian Countries <sup>20, 25, 62</sup>                                                               | 3 (5.0)   |
| Netherlands, Italy, Austria, Russia, Slovenia, Slovak Republic, Hungary, and Germany <sup>21</sup>         | 1 (1.7)   |
| <b>TBI CPGs (N=58)</b>                                                                                     |           |
| <b>Injury Severity</b>                                                                                     |           |
| Mild/concussion <sup>9, 13, 14, 18, 21-23, 29, 34, 35, 38, 39, 41, 45, 46, 48-51, 53, 56, 57, 61, 62</sup> | 24 (41.4) |
| Severe <sup>3, 4, 8, 24, 26, 28, 30, 31, 58</sup>                                                          | 8 (13.8)  |
| Mild or moderate <sup>20, 25</sup>                                                                         | 2 (3.4)   |
| Moderate or severe <sup>36, 37, 63-69</sup>                                                                | 3 (5.2)   |
| All severity <sup>10, 15, 17, 19, 42, 52, 55</sup>                                                         | 7 (12.1)  |
| Not specified <sup>5-7, 11, 12, 16, 27, 32, 33, 40, 43, 44, 47, 54</sup>                                   | 14 (24.1) |
| <b>Focus of the Guidelines<sup>a</sup></b>                                                                 |           |
| Assessment/evaluation <sup>13-16, 19, 26, 27, 30, 35-38, 46, 47, 49, 51, 58, 61</sup>                      | 17 (29.3) |
| Management <sup>3-17, 20-25, 27-29, 31, 33-37, 39-41, 44-46, 48-50, 52, 53, 55, 57, 58, 61, 62</sup>       | 45 (77.6) |
| Treatment <sup>26, 30, 34, 38, 44, 47, 54</sup>                                                            | 6 (10.3)  |
| Diagnosis or screening <sup>5, 9, 10, 15, 29, 34, 39, 40, 42, 43, 50, 52, 55, 56</sup>                     | 14 (24.1) |
| Rehabilitation <sup>10, 36, 44, 51, 57, 63-69</sup>                                                        | 6 (10.3)  |
| Prevention <sup>13, 32</sup>                                                                               | 2 (3.4)   |
| Return to activity <sup>13, 18, 34, 45</sup>                                                               | 5 (8.6)   |
| Return to school <sup>34, 45</sup>                                                                         | 2 (3.4)   |
| Return to sport <sup>13</sup>                                                                              | 1 (1.7)   |
| General activity resumption <sup>18, 45</sup>                                                              | 2 (3.4)   |
| <b>Age of Target population</b>                                                                            |           |
| Infants, children, youth, adolescents                                                                      | 12 (20.7) |
| Age not specified <sup>45, 48, 53, 58</sup>                                                                | 4 (6.9)   |
| <16 years <sup>27, 52</sup>                                                                                | 2 (3.4)   |
| <18 years <sup>25, 31, 34, 36, 39</sup>                                                                    | 5 (8.6)   |
| 5-18 years <sup>50</sup>                                                                                   | 1 (1.7)   |
| Adults                                                                                                     | 21 (36.2) |
| Age not specified <sup>3, 5, 26, 30, 32, 33, 37, 40, 46, 57, 61</sup>                                      | 10 (17.2) |
| ≥16 years <sup>9, 17, 24, 55</sup>                                                                         | 4 (6.9)   |
| ≥18 years <sup>20, 35, 38, 41, 62-69</sup>                                                                 | 6 (10.3)  |
| 18-65 years <sup>19</sup>                                                                                  | 1 (1.7)   |
| Children and adults                                                                                        | 11 (19.0) |
| Age not specified <sup>4, 6-8, 11, 13, 16, 21, 28, 49</sup>                                                | 10 (17.2) |
| ≥8 years of age <sup>51</sup>                                                                              | 1 (1.7)   |
| All ages <sup>10, 15</sup>                                                                                 | 2 (3.4)   |
| Not specified <sup>12, 14, 18, 22, 23, 29, 42-44, 47, 54, 56</sup>                                         | 12 (20.7) |
| <b>Target Population<sup>a,b</sup></b>                                                                     |           |
| Not specified                                                                                              | 44 (75.9) |
| Sports/athletes <sup>13, 14, 29</sup>                                                                      | 3 (5.2)   |
| Military <sup>41, 57</sup>                                                                                 | 2 (3.4)   |
| Injured workers <sup>23</sup>                                                                              | 1 (1.7)   |
| At-risk for speech, language, and/or swallowing disorders <sup>36</sup>                                    | 1 (1.7)   |
| TBI from road traffic accident <sup>5</sup>                                                                | 1 (1.7)   |
| Other <sup>9, 17, 49, 51, 52, 55</sup>                                                                     | 6 (10.3)  |
| <b>Target Audience<sup>a,c</sup></b>                                                                       |           |
| Healthcare professionals <sup>3-8, 10-16, 18, 19, 21, 23, 24, 26, 28-50, 52-58, 62-69</sup>                | 51 (87.9) |

|                                                                                                                                                                                                                                                                                                                                                                                                                                                                                                                                                                                                                                                                                                                                                                                                                                                                                                                                                                                                                                                                                                                                                                                                                                                                                                                                                                                                                                                                                                                                                                                                                                                                                                                                                                                                                                                                                                                                                                                                                                                                                                                                                                                                                                    |                                                                                                              |
|------------------------------------------------------------------------------------------------------------------------------------------------------------------------------------------------------------------------------------------------------------------------------------------------------------------------------------------------------------------------------------------------------------------------------------------------------------------------------------------------------------------------------------------------------------------------------------------------------------------------------------------------------------------------------------------------------------------------------------------------------------------------------------------------------------------------------------------------------------------------------------------------------------------------------------------------------------------------------------------------------------------------------------------------------------------------------------------------------------------------------------------------------------------------------------------------------------------------------------------------------------------------------------------------------------------------------------------------------------------------------------------------------------------------------------------------------------------------------------------------------------------------------------------------------------------------------------------------------------------------------------------------------------------------------------------------------------------------------------------------------------------------------------------------------------------------------------------------------------------------------------------------------------------------------------------------------------------------------------------------------------------------------------------------------------------------------------------------------------------------------------------------------------------------------------------------------------------------------------|--------------------------------------------------------------------------------------------------------------|
| <p>Clinicians/physicians<sup>9, 17, 20, 25, 27</sup><br/> Allied health professionals<sup>35, 36, 38, 44, 57, 62</sup><br/> Nurses<sup>22, 35, 38, 41, 44</sup><br/> Physiotherapist<sup>51</sup><br/> Emergency medical service provider<sup>6, 61</sup><br/> Athletic trainer/sports organizations<sup>13</sup><br/> Families/caregivers/persons with TBI<sup>5, 10, 11, 14-16, 19, 32, 45, 62-69</sup><br/> Employers<sup>19</sup></p>                                                                                                                                                                                                                                                                                                                                                                                                                                                                                                                                                                                                                                                                                                                                                                                                                                                                                                                                                                                                                                                                                                                                                                                                                                                                                                                                                                                                                                                                                                                                                                                                                                                                                                                                                                                          | <p>5 (8-6)<br/> 6 (10-3)<br/> 5 (8.6)<br/> 1 (1-7)<br/> 2 (3-4)<br/> 1 (1-7)<br/> 10 (17-2)<br/> 1 (1-7)</p> |
| <p><b>Text-positive TBI CPGs<sup>41, 57, 61</sup> – Keywords and Quotes</b></p> <p>Housing – “In assessment of patients with persistent symptoms, focus should be given to other factors including psychiatric, psychosocial support, and compensation/litigation issues and a comprehensive psychosocial evaluation should be obtained, to include: a. Support systems (e.g., family, vocational) b. Mental health history for pre-morbid conditions which may impact current care c. Co-occurring conditions (e.g., chronic pain, mood disorders, stress disorder, personality disorder) d. Substance use disorder (e.g., alcohol, prescription misuse, illicit drugs, caffeine) e. Secondary gain issues (e.g., compensation, litigation) f. Unemployment or/change in job status g. Other issues (e.g., financial/housing/legal)”<sup>41</sup></p> <p>“Case managers may: [...] Address psychosocial issues (financial, family, <b>housing</b>, or school/work)”<sup>57</sup></p> <p>Homelessness – “Racial and ethnic minorities, people who experience <b>homelessness</b>, people who are in correctional and detention facilities, and survivors of intimate partner violence are groups disproportionately affected by TBI”<sup>61</sup></p>                                                                                                                                                                                                                                                                                                                                                                                                                                                                                                                                                                                                                                                                                                                                                                                                                                                                                                                                                                              | <p>3 (5-3)</p>                                                                                               |
| <b>CPGs for Homelessness (N=2)</b>                                                                                                                                                                                                                                                                                                                                                                                                                                                                                                                                                                                                                                                                                                                                                                                                                                                                                                                                                                                                                                                                                                                                                                                                                                                                                                                                                                                                                                                                                                                                                                                                                                                                                                                                                                                                                                                                                                                                                                                                                                                                                                                                                                                                 |                                                                                                              |
| <p><b>Focus of the Guidelines</b></p> <p>Social and health management<sup>60</sup><br/> Integrated health and social care services<sup>59</sup></p>                                                                                                                                                                                                                                                                                                                                                                                                                                                                                                                                                                                                                                                                                                                                                                                                                                                                                                                                                                                                                                                                                                                                                                                                                                                                                                                                                                                                                                                                                                                                                                                                                                                                                                                                                                                                                                                                                                                                                                                                                                                                                | <p>1 (50-0)<br/> 1 (50-0)</p>                                                                                |
| <p><b>Age of Target Population</b></p> <p>≥16 years<sup>59</sup><br/> Not specified<sup>60</sup></p>                                                                                                                                                                                                                                                                                                                                                                                                                                                                                                                                                                                                                                                                                                                                                                                                                                                                                                                                                                                                                                                                                                                                                                                                                                                                                                                                                                                                                                                                                                                                                                                                                                                                                                                                                                                                                                                                                                                                                                                                                                                                                                                               | <p>1 (50-0)<br/> 1 (50-0)</p>                                                                                |
| <p><b>Target Population<sup>a</sup></b></p> <p>Individuals experiencing homelessness<sup>59, 60</sup><br/> Vulnerably housed individuals<sup>60</sup></p>                                                                                                                                                                                                                                                                                                                                                                                                                                                                                                                                                                                                                                                                                                                                                                                                                                                                                                                                                                                                                                                                                                                                                                                                                                                                                                                                                                                                                                                                                                                                                                                                                                                                                                                                                                                                                                                                                                                                                                                                                                                                          | <p>2 (100-0)<br/> 1 (50-0)</p>                                                                               |
| <p><b>Target Audience<sup>a,c</sup></b></p> <p>Healthcare professionals<sup>59, 60</sup><br/> Policy-makers<sup>60</sup><br/> Researchers<sup>60</sup><br/> Local authorities<sup>59</sup><br/> Individuals experiencing homelessness/families<sup>59</sup><br/> Advocate<sup>59</sup><br/> Individuals providing services to those who experience homelessness<sup>59</sup></p>                                                                                                                                                                                                                                                                                                                                                                                                                                                                                                                                                                                                                                                                                                                                                                                                                                                                                                                                                                                                                                                                                                                                                                                                                                                                                                                                                                                                                                                                                                                                                                                                                                                                                                                                                                                                                                                   | <p>2 (100-0)<br/> 1 (50-0)<br/> 1 (50-0)<br/> 1 (50-0)<br/> 1 (50-0)<br/> 1 (50-0)<br/> 1 (50-0)</p>         |
| <p><b>Text-positive homelessness CPGs<sup>59, 60</sup> – Keywords and Quotes</b></p> <p>Brain injury – “We specifically asked participants, while answering the Delphi survey, to keep in mind 3 priority-setting criteria when considering the unique challenges of implementing health care for homeless or vulnerably housed people: value added (i.e., the opportunity for a unique and relevant contribution), reduction of unfair and preventable health inequities, and decrease in burden of illness (i.e., the number of people who may have a disease or condition). [...] The priority marginalised populations identified included Indigenous people; women and families; youth; people with acquired <b>brain injury</b>, or intellectual or physical disabilities; and refugees and other migrants.”<sup>60</sup></p> <p>“Experience of psychological trauma and adverse childhood events are common in people experiencing homelessness, and the prevalence of people who are neuroatypical or have a <b>brain injury</b> is higher than in the general population.”<sup>59</sup></p> <p>“Good qualitative evidence also suggested that low literacy levels among some people experiencing homelessness can add to difficulties in accessing care. The committee agreed that this could include some migrants and people with learning disabilities or acquired <b>brain injury</b>. They therefore emphasised the need to tailor communication and information provision to people's needs and preferences, taking into account a wide range of possible speech, language and communication difficulties.”<sup>59</sup></p> <p>The committee's experience of health and social care services designed to support housing was positive, and tenancy sustainment was commonly achieved through this wraparound approach. The committee agreed, based on their knowledge and experience, that the level of support depends on the person's needs, with some people needing specialist onsite support. These could be people with high levels of need or severe and multiple disadvantage who are vulnerable to abuse and exploitation, young people who have no experience of independent living, people who have</p> | <p>2 (100-0)</p>                                                                                             |

|                                                                                                                                                                                          |  |
|------------------------------------------------------------------------------------------------------------------------------------------------------------------------------------------|--|
| experienced domestic abuse, or people with particular care needs who need support in everyday life because of premature aging, acquired <b>brain injury</b> or disability. <sup>59</sup> |  |
|------------------------------------------------------------------------------------------------------------------------------------------------------------------------------------------|--|

CPG: Clinical practice guideline; TBI: Traumatic brain injury

<sup>a</sup> Each CPG may target more than one focus, population, or audience; thus, the total N and % will not equal to 100%.

<sup>b</sup> Other includes: CPGs specifically for individuals who (a) sustained a closed head injury; (b) has or may have sustained a concussion in the previous month; (c) experience movement-related impairments from TBI; (d) presented to the emergency department; or (e) are in the sub-acute, acute, or chronic phase of TBI.

<sup>c</sup> Where specified, healthcare professionals are further categorised in this table.

## References

1. Menon DK, Schwab K, Wright DW, Maas AI. Position statement: definition of traumatic brain injury. *Arch Phys Med Rehabil*. 2010;91(11):1637-40. doi:10.1016/j.apmr.2010.05.017
  2. Gaetz SB, C.; Friesen, A.; Harris, B.; Hill, C.; Kovacs-Burns, K.; Pauly, B.; Pearce, B.; Turner, A.; Marsolais, A. *Canadian Definition of Homelessness*. Toronto; 2012.
  3. Chang BS, Lowenstein DH. Practice parameter: Antiepileptic drug prophylaxis in severe traumatic brain injury. *Neurology*. 2003;60(1):10. doi:10.1212/01.WNL.0000031432.05543.14
  4. French Language Neuroanesthesia and Resuscitation Association SAff, French Society of Neurosurgery, French Society of Neuroradiology, French Language Resuscitation Society, French Society of Anesthesia and Resuscitation, French Pediatric Society, Francophone Society of Medical Emergencies,. *Management of cranial injuries early-phase*. 2000;81:643-8.
  5. Trevena L, Cameron, I., & Porwal, M. . *Clinical Practice Guidelines for the Care of People Living with Traumatic Brain Injury in the Community*. 2004.[cited August 18, 2022]
  6. Badjatia N, Carney N, Crocco TJ, Fallat ME, Hennes HM, Jagoda AS, et al. Guidelines for prehospital management of traumatic brain injury 2nd edition. *Prehospital emergency care*. 2008;12 Suppl 1:S1-52. doi:10.1080/10903120701732052
  7. Kennedy MR, Coelho C, Turkstra L, Ylvisaker M, Moore Sohlberg M, Yorkston K, et al. Intervention for executive functions after traumatic brain injury: a systematic review, meta-analysis and clinical recommendations. *Neuropsychological rehabilitation*. 2008;18(3):257-99. doi:10.1080/09602010701748644
  8. Liao KH, Chang CK, Chang HC, Chang KC, Chen CF, Chen TY, et al. Clinical practice guidelines in severe traumatic brain injury in Taiwan. *Surgical neurology*. 2009;72 Suppl 2:S66-73; discussion S-4. doi:10.1016/j.surneu.2009.07.004
  9. Motor Accidents Authority New South Wales. *Guidelines for mild traumatic brain injury following closed head injury*. 2008.[cited August 18, 2022]
  10. New Zealand Guidelines Group. *Traumatic brain injury: Diagnosis, acute management and rehabilitation*. The Terrace, Wellington, New Zealand; 2006.[cited August 18, 2022]
  11. Scottish Intercollegiate Guidelines Network. *Early management of patients with a head injury: A national clinical guideline*. Hillside Crescent, Edinburgh; 2009.[cited August 18, 2022]
  12. Warden DL, Gordon B, McAllister TW, Silver JM, Barth JT, Bruns J, et al. Guidelines for the pharmacologic treatment of neurobehavioral sequelae of traumatic brain injury. *Journal of neurotrauma*. 2006;23(10):1468-501. doi:10.1089/neu.2006.23.1468
  13. Broglio SP, Cantu RC, Gioia GA, Guskiewicz KM, Kutcher J, Palm M, et al. National Athletic Trainers' Association position statement: management of sport concussion. *Journal of athletic training*. 2014;49(2):245-65. doi:10.4085/1062-6050-49.1.07
  14. Giza CC, Kutcher JS, Ashwal S, Barth J, Getchius TSD, Gioia GA, et al. Summary of evidence-based guideline update: Evaluation and management of concussion in sports. *Neurology*. 2013;80(24):2250. doi:10.1212/WNL.0b013e31828d57dd
  15. National Clinical Guideline C. National Institute for Health and Clinical Excellence: *Guidance. Head Injury: Triage, Assessment, Investigation and Early Management of Head Injury in Children, Young People and Adults*. London: National Institute for Health and Care Excellence (UK)
- Copyright © National Clinical Guideline Centre, 2014.; 2014.
16. National Institute for Health and Care Excellence. *Head injury: assessment and early management*. 2014.[cited August 18, 2022]
  17. New South Wales Ministry of Health. *Initial management of closed head injury in adults*. 2011.[cited August 18, 2022]

18. Silverberg ND, Iverson GL. Is rest after concussion "the best medicine?": recommendations for activity resumption following concussion in athletes, civilians, and military service members. *J Head Trauma Rehabil.* 2013;28(4):250-9. doi:10.1097/HTR.0b013e31825ad658
19. Stergiou-Kita M, Dawson D, Rappolt S. Inter-professional clinical practice guideline for vocational evaluation following traumatic brain injury: a systematic and evidence-based approach. *Journal of occupational rehabilitation.* 2012;22(2):166-81. doi:10.1007/s10926-011-9332-2
20. Undén J, Ingebrigtsen T, Romner B, the Scandinavian Neurotrauma C. Scandinavian guidelines for initial management of minimal, mild and moderate head injuries in adults: an evidence and consensus-based update. *BMC medicine.* 2013;11(1):50. doi:10.1186/1741-7015-11-50
21. Vos PE, Battistin L, Birbamer G, Gerstenbrand F, Potapov A, Prevec T, et al. EFNS guideline on mild traumatic brain injury: report of an EFNS task force. *European journal of neurology.* 2002;9(3):207-19. doi:10.1046/j.1468-1331.2002.00407.x
22. West T, Bergman, K, Biggins, MS, French, B, Galletly, J, Hinkle, JL, & Morris, JM. . Care of the patient with mild traumatic brain injury. 2011.[cited August 18, 2022]
23. Workplace Safety and Insurance Board. MILD TRAUMATIC BRAIN INJURYPROGRAM OF CARE 2012.[cited August 18, 2022]
24. Alali AS, Mukherjee K, McCredie VA, Golan E, Shah PS, Bardes JM, et al. Beta-blockers and Traumatic Brain Injury: A Systematic Review, Meta-analysis, and Eastern Association for the Surgery of Trauma Guideline. *Annals of surgery.* 2017;266(6):952-61. doi:10.1097/sla.0000000000002286
25. Astrand R, Rosenlund C, Undén J. Scandinavian guidelines for initial management of minor and moderate head trauma in children. *BMC medicine.* 2016;14:33. doi:10.1186/s12916-016-0574-x
26. Carney N, Totten, AM, O'eilly, C, Ullman, JS, Hawryluk, GWJ, Bell, MJ, Bratton, SL, Chesnut, R, Harris, OA, Kissoon, N, Rubiano, AM, Shutter, L, Tasker, RC, Vavilala, MS, Wilberger, J, Wright, DW, Ghajar, J. . Guidelines for the Management of Severe Traumatic Brain Injury. Brain Trauma Foundation; 2016.[cited August 18, 2022]
27. Da Dalt L, Parri N, Amigoni A, Nocerino A, Selmin F, Manara R, et al. Italian guidelines on the assessment and management of pediatric head injury in the emergency department. *Italian journal of pediatrics.* 2018;44(1):7. doi:10.1186/s13052-017-0442-0
28. Geeraerts T, Velly L, Abdennour L, Asehnoune K, Audibert G, Bouzat P, et al. Management of severe traumatic brain injury (first 24hours). *Anaesthesia, critical care & pain medicine.* 2018;37(2):171-86. doi:10.1016/j.accpm.2017.12.001
29. Harmon KG, Clugston JR, Dec K, Hainline B, Herring S, Kane SF, et al. American Medical Society for Sports Medicine position statement on concussion in sport. *British Journal of Sports Medicine.* 2019;53(4):213. doi:10.1136/bjsports-2018-100338
30. Hawryluk GWJ, Rubiano AM, Totten AM, O'Reilly C, Ullman JS, Bratton SL, et al. Guidelines for the Management of Severe Traumatic Brain Injury: 2020 Update of the Decompressive Craniectomy Recommendations. *Neurosurgery.* 2020;87(3):427-34. doi:10.1093/neuros/nyaa278
31. Kochanek PM, Tasker RC, Carney N, Totten AM, Adelson PD, Selden NR, et al. Guidelines for the Management of Pediatric Severe Traumatic Brain Injury, Third Edition: Update of the Brain Trauma Foundation Guidelines, Executive Summary. *Neurosurgery.* 2019;84(6):1169-78. doi:10.1093/neuros/nyz051
32. Luauté J, Hamonet J, Pradat-Diehl P. Behavioral and affective disorders after brain injury: French guidelines for prevention and community supports. *Annals of physical and rehabilitation medicine.* 2016;59(1):68-73. doi:10.1016/j.rehab.2015.10.007
33. Luauté J, Plantier D, Wiart L, Tell L. Care management of the agitation or aggressiveness crisis in patients with TBI. Systematic review of the literature and practice recommendations. *Annals of physical and rehabilitation medicine.* 2016;59(1):58-67. doi:10.1016/j.rehab.2015.11.001



34. Lumba-Brown A, Yeates KO, Sarmiento K, Breiding MJ, Haegerich TM, Gioia GA, et al. Centers for Disease Control and Prevention Guideline on the Diagnosis and Management of Mild Traumatic Brain Injury Among Children. *JAMA pediatrics*. 2018;172(11):e182853. doi:10.1001/jamapediatrics.2018.2853
35. Marshall S, Bayley M, McCullagh S, Velikonja D, Berrigan L, Ouchterlony D, et al. Updated clinical practice guidelines for concussion/mild traumatic brain injury and persistent symptoms. *Brain injury*. 2015;29(6):688-700. doi:10.3109/02699052.2015.1004755
36. Morgan A MC, Anderson V, Waugh M-C, Cahill L, & the TBI Guideline Expert Working Committee. CLINICAL PRACTICE GUIDELINE FOR THE MANAGEMENT OF COMMUNICATION AND SWALLOWING DISORDERS FOLLOWING PAEDIATRIC TRAUMATIC BRAIN INJURY. 2017.[cited August 18, 2022]
37. National Institute of Excellence in Health and Social Services (INESSS) ONF. CLINICAL PRACTICE GUIDELINE FOR THE REHABILITATION OF ADULTS WITH MODERATE TO SEVERE TBI. 2016.[cited August 18, 2022]
38. Ontario Neurotrauma Foundation. Guideline for Concussion/Mild Traumatic Brain Injury & Prolonged Symptoms. 2018.[cited August 18, 2022]
39. Pediatric mTBI Guideline Workgroup. Systematic Review and Clinical Recommendations for Healthcare Providers on the Diagnosis and Management of Mild Traumatic Brain Injury Among Children 2016.[cited August 18, 2022]
40. Tan CL, Alavi SA, Baldeweg SE, Belli A, Carson A, Feeney C, et al. The screening and management of pituitary dysfunction following traumatic brain injury in adults: British Neurotrauma Group guidance. *Journal of neurology, neurosurgery, and psychiatry*. 2017;88(11):971-81. doi:10.1136/jnnp-2016-315500
41. The Management of Concussion-mild Traumatic Brain Injury Working Group. VA/DoD CLINICAL PRACTICE GUIDELINE FOR THE MANAGEMENT OF CONCUSSION-MILD TRAUMATIC BRAIN INJURY. Department of Veterans Affairs, n Department of Defense; 2016.[cited August 18, 2022]
42. Wintermark M, Sanelli PC, Anzai Y, Tsiouris AJ, Whitlow CT. Imaging evidence and recommendations for traumatic brain injury: advanced neuro- and neurovascular imaging techniques. *AJNR American journal of neuroradiology*. 2015;36(2):E1-e11. doi:10.3174/ajnr.A4181
43. Wintermark M, Sanelli PC, Anzai Y, Tsiouris AJ, Whitlow CT. Imaging evidence and recommendations for traumatic brain injury: conventional neuroimaging techniques. *Journal of the American College of Radiology : JACR*. 2015;12(2):e1-14. doi:10.1016/j.jacr.2014.10.014
44. Wheeler S. Occupational Therapy Practice Guidelines for Adults with Traumatic Brain Injury 2016 [Available from: <https://www.brainline.org/article/occupational-therapy-practice-guidelines-adults-traumatic-brain-injury>].[cited August 18]
45. DeMatteo C, Randall S, Falla K, Lin CY, Giglia L, Mazurek MF, et al. Concussion Management for Children Has Changed: New Pediatric Protocols Using the Latest Evidence. *Clinical pediatrics*. 2020;59(1):5-20. doi:10.1177/0009922819879457
46. Evans R, Whitlow, CT. Acute mild traumatic brain injury (concussion) in adults. 2022.[cited August 18, 2022]
47. Lim M, Baumann, CR. . Sleep-wake disorders in patients with traumatic brain injury. 2021.[cited August 18, 2022]
48. Meehan W, O'Brien, MJ. Concussion in children and adolescents: Management. 2022.[cited August 18, 2022]
49. National Institute of Excellence in Health and Social Services (INESSS). Assessment and management of the risk of serious neurological complications following mild traumatic brain injury. 2021.[cited August 18, 2022]
50. Ontario Neurotrauma Foundation. Living Guideline for Pediatric Concussion Care. 2021.[cited August 18, 2022]

51. Quatman-Yates CC, Hunter-Giordano A, Shimamura KK, Landel R, Alsalaheen BA, Hanke TA, et al. Physical Therapy Evaluation and Treatment After Concussion/Mild Traumatic Brain Injury. *The Journal of orthopaedic and sports physical therapy*. 2020;50(4):Cpg1-cpg73. doi:10.2519/jospt.2020.0301
52. Ryan ME, Pruthi S, Desai NK, Falcone RA, Jr., Glenn OA, Joseph MM, et al. ACR Appropriateness Criteria® Head Trauma-Child. *Journal of the American College of Radiology : JACR*. 2020;17(5s):S125-s37. doi:10.1016/j.jacr.2020.01.026
53. Schutzman S. Minor head trauma in infants and children: Management. 2021.[cited August 18, 2022]
54. Schytz H. Post-traumatic headache. 2021.
55. Shih RY, Burns J, Ajam AA, Broder JS, Chakraborty S, Kendi AT, et al. ACR Appropriateness Criteria® Head Trauma: 2021 Update. *Journal of the American College of Radiology : JACR*. 2021;18(5s):S13-s36. doi:10.1016/j.jacr.2021.01.006
56. Tenney JR, Gloss D, Arya R, Kaplan PW, Lesser R, Sexton V, et al. Practice Guideline: Use of Quantitative EEG for the Diagnosis of Mild Traumatic Brain Injury: Report of the Guideline Committee of the American Clinical Neurophysiology Society. *Journal of clinical neurophysiology : official publication of the American Electroencephalographic Society*. 2021;38(4):287-92. doi:10.1097/wnp.0000000000000853
57. The Management and Rehabilitation of Post-Acute Mild Traumatic Brain Injury Work Group. VA/DoD CLINICAL PRACTICE GUIDELINE FOR THE MANAGEMENT AND REHABILITATION OF POST-ACUTE MILD TRAUMATIC BRAIN INJURY. 2021.[cited August 18, 2022]
58. Vavilala M, Tasker, RC. . Severe traumatic brain injury (TBI) in children: Initial evaluation and management. 2021.[cited August 18, 2022]
59. National Institute for Health and Care Excellence. Integrated health and social care for people experiencing homelessness. 2022.
60. Pottie K, Kendall CE, Aubry T, Magwood O, Andermann A, Salvalaggio G, et al. Clinical guideline for homeless and vulnerably housed people, and people with lived homelessness experience. *Canadian Medical Association Journal*. 2020;192(10):E240. doi:10.1503/cmaj.190777
61. Physicians ACoE. Clinical Policy: Critical Issues in the Management of Adult Patients Presenting to the Emergency Department with Mild Traumatic Brain Injury. 2023.
62. Rytter HM GH, Henriksen HK, Aaen N, Hartvigsen J, Hoegh M, Nisted I, Næss-Schmidt ET, Pedersen LL, Schytz HW, Thastum MM, Zerlang B, Callesen HE. National clinical guideline for non-pharmacological treatment of long-term symptoms after concussion. 2021.
63. Bayley MT, Janzen S, Harnett A, Bragge P, Togher L, Kua A, et al. INCOG 2.0 Guidelines for Cognitive Rehabilitation Following Traumatic Brain Injury: What's Changed From 2014 to Now? *The Journal of Head Trauma Rehabilitation*. 2023;38(1).
64. Bayley MT, Janzen S, Harnett A, Teasell R, Patsakos E, Marshall S, et al. INCOG 2.0 Guidelines for Cognitive Rehabilitation Following Traumatic Brain Injury: Methods, Overview, and Principles. *The Journal of Head Trauma Rehabilitation*. 2023;38(1).
65. Jeffay E, Ponsford J, Harnett A, Janzen S, Patsakos E, Douglas J, et al. INCOG 2.0 Guidelines for Cognitive Rehabilitation Following Traumatic Brain Injury, Part III: Executive Functions. *The Journal of Head Trauma Rehabilitation*. 2023;38(1).
66. Ponsford J, Trevena-Peters J, Janzen S, Harnett A, Marshall S, Patsakos E, et al. INCOG 2.0 Guidelines for Cognitive Rehabilitation Following Traumatic Brain Injury, Part I: Posttraumatic Amnesia. *The Journal of Head Trauma Rehabilitation*. 2023;38(1).
67. Ponsford J, Velikonja D, Janzen S, Harnett A, McIntyre A, Wiseman-Hakes C, et al. INCOG 2.0 Guidelines for Cognitive Rehabilitation Following Traumatic Brain Injury, Part II: Attention and Information Processing Speed. *The Journal of Head Trauma Rehabilitation*. 2023;38(1).

68. Togher L, Douglas J, Turkstra LS, Welch-West P, Janzen S, Harnett A, et al. INCOG 2.0 Guidelines for Cognitive Rehabilitation Following Traumatic Brain Injury, Part IV: Cognitive-Communication and Social Cognition Disorders. *The Journal of Head Trauma Rehabilitation*. 2023;38(1).
69. Velikonja D, Ponsford J, Janzen S, Harnett A, Patsakos E, Kennedy M, et al. INCOG 2.0 Guidelines for Cognitive Rehabilitation Following Traumatic Brain Injury, Part V: Memory. *The Journal of Head Trauma Rehabilitation*. 2023;38(1).
